# Supplementary material
Source: PubMed Central journal article supplement (PMC8253488)
Supplement: cr0c00215_si_001.pdf [file cr0c00215_si_001.pdf]

# **Structural and Chemical Biology of the Interaction of Cyclooxygenase with Substrates and Non-Steroidal Anti-Inflammatory Drugs**

Carol A. Rouzer and Lawrence J. Marnett\*

A. B. Hancock Jr. Memorial Laboratory for Cancer Research, Departments of Biochemistry, Chemistry, and Pharmacology, Vanderbilt Institute of Chemical Biology, Center in Molecular Toxicology, Vanderbilt-Ingram Cancer Center, Vanderbilt University School of Medicine, Nashville, Tennessee 37232

## **Supporting Information Table of Contents**

|                                     |                 |
|-------------------------------------|-----------------|
| 1. Table S1                         | Pages S2-S18    |
| 2. Table S2                         | Pages S19-S34   |
| 3. Figures S1-S20 Wall-Eyed Format  | Pages S35-S63   |
| 4. Figures 1-22 Cross-Eyed Format   | Pages S64-S100  |
| 5. Figures S1-S20 Cross-Eyed Format | Pages S101-S132 |

**Table S1. Summary table of crystal structures.**

Data are listed in alphabetical order by ligand. Inhibitors are listed first followed by fatty acids. If more than one structure is available for a given ligand, data are provided for complexes containing COX-1 followed by COX-2. If more than one structure is available for a given enzyme-ligand complex, they are listed historically first for the wild-type enzyme followed by mutations of the enzyme created to study enzyme-ligand interactions. Sequence variations designate amino acids that differ from the NCBI reference sequence. These include intentionally and unintentionally engineered mutations and naturally occurring variants.

| PDB# | Ref | Res    | Isoform<br>Cofactor<br>Species<br>Sequence<br>variations        | Asym<br>Unit       | Ligand<br>Structure                                                                                                            |
|------|-----|--------|-----------------------------------------------------------------|--------------------|--------------------------------------------------------------------------------------------------------------------------------|
| 5F19 | 1   | 2.04 Å | COX-2<br>Acetyl-<br>Co <sup>3+</sup> -PPIX<br>Human<br>Δ586-612 | 1 dimer<br>I222    | Acetylated                                                                                                                     |
| 1EBV | 2   | 3.2 Å  | COX-1<br>Acetyl-<br>Fe <sup>3+</sup> -PPIX<br>Sheep             | 1 monomer<br>I222  | <i>O</i> -Acetylsalicylhydroxamic Acid<br>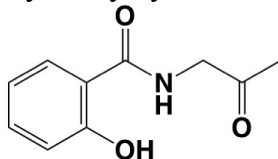 |
| 1HT8 | 3   | 2.69 Å | COX-1<br>Fe <sup>3+</sup> -PPIX<br>Sheep                        | 1 dimer<br>I222    | Alclofenac<br>                            |
| 5W58 | 4   | 2.27 Å | COX-2<br>Fe <sup>3+</sup> -PPIX<br>Mouse                        | 1 monomer<br>I4 22 | ARN-2508<br>                               |



|      |   |        |                                                     |                                              |                                                                                                                                                                   |
|------|---|--------|-----------------------------------------------------|----------------------------------------------|-------------------------------------------------------------------------------------------------------------------------------------------------------------------|
| 3KK6 | 5 | 2.75 Å | COX-1<br>Fe <sup>3+</sup> -PPIX<br>Sheep            | 1 dimer<br>P6 <sub>5</sub>                   | Celecoxib<br>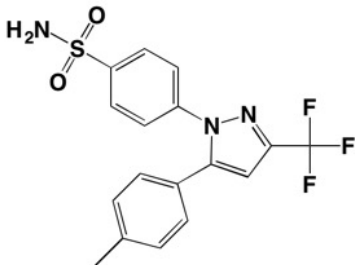                                                                  |
| 3LN1 | 6 | 2.4 Å  | COX-2<br>Fe <sup>3+</sup> -PPIX<br>Mouse            | 2 dimers<br>P2 <sub>1</sub> 2 <sub>1</sub> 2 | Celecoxib<br>                                                                  |
| 5JW1 | 7 | 2.82 Å | COX-2<br>Co <sup>3+</sup> -PPIX<br>Mouse<br>S121P   | 1 dimer<br>I222                              | Celecoxib<br>                                                                 |
| 4Z0L | 8 | 2.29 Å | COX-2<br>Fe <sup>3+</sup> -PPIX<br>Mouse            | 2 dimers<br>P2 <sub>1</sub> 2 <sub>1</sub> 2 | <i>nido</i> -Dicarbaborate derivative of<br>indomethacin methyl ester4Z0<br> |
| 3N8Y | 5 | 2.6 Å  | COX-1<br>Acetyl-<br>Fe <sup>3+</sup> -PPIX<br>Sheep | 1 dimer<br>P6 <sub>5</sub>                   | Diclofenac<br>                                                               |

|      |    |        |                                                      |                                              |                                                                                                               |
|------|----|--------|------------------------------------------------------|----------------------------------------------|---------------------------------------------------------------------------------------------------------------|
| 1PXX | 9  | 2.9 Å  | COX-2<br>Fe <sup>3+</sup> -PPIX<br>Mouse             | 2 dimers<br>P2 <sub>1</sub> 2 <sub>1</sub> 2 | <p>Diclofenac</p> 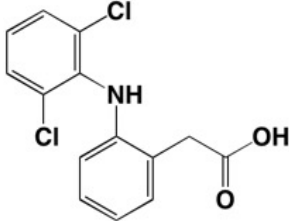         |
| 5IKV | 10 | 2.51 Å | COX-2<br>Co <sup>3+</sup> -PPIX<br>Human<br>Δ586-612 | 1 dimer<br>I222                              | <p>Flufenamic Acid</p>     |
| 1CQE | 11 | 3.1 Å  | COX-1<br>Fe <sup>3+</sup> -PPIX<br>Sheep             | 1 dimer<br>I222                              | <p>(S)-Flurbiprofen</p>    |
| 1EQH | 3  | 2.7 Å  | COX-1<br>Fe <sup>3+</sup> -PPIX<br>Sheep             | 1 dimer<br>I222                              | <p>(S)-Flurbiprofen</p>  |
| 2AYL | 12 | 2.0 Å  | COX-1<br>Mn <sup>3+</sup> -PPIX<br>Sheep             | 1 dimer<br>I222                              | <p>(S)-Flurbiprofen</p>  |
| 3N8Z | 5  | 2.9 Å  | COX-1<br>Fe <sup>3+</sup> -PPIX<br>Sheep             | 1 dimer<br>P6 <sub>5</sub>                   | <p>(S)-Flurbiprofen</p>  |

|      |    |        |                                                                     |                                              |                                                                                                                           |
|------|----|--------|---------------------------------------------------------------------|----------------------------------------------|---------------------------------------------------------------------------------------------------------------------------|
| 3N8W | 5  | 2.75 Å | COX-1<br>Fe <sup>3+</sup> -PPIX<br>Sheep<br>R120Q/WT<br>heterodimer | 1 dimer<br>P6 <sub>5</sub>                   | (S)-Flurbiprofen<br>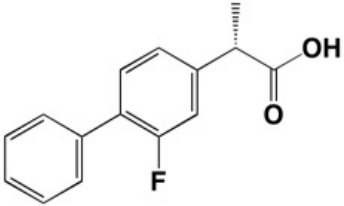                   |
| 3PGH | 13 | 2.5 Å  | COX-2<br>Fe <sup>3+</sup> -PPIX<br>Mouse<br>N310Q<br>R333K          | 2 dimers<br>P2 <sub>1</sub> 2 <sub>1</sub> 2 | (S)-Flurbiprofen<br>                   |
| 3RR3 | 14 | 2.84 Å | COX-2<br>Fe <sup>3+</sup> -PPIX<br>Mouse                            | 2 dimers<br>P2 <sub>1</sub> 2 <sub>1</sub> 2 | (R)-Flurbiprofen<br>                   |
| 5JVZ | 7  | 2.62 Å | COX-2<br>Co <sup>3+</sup> -PPIX<br>Mouse<br>S121P                   | 1 dimer<br>I222                              | (S)-Flurbiprofen<br>                 |
| 1HT5 | 3  | 2.75 Å | COX-1<br>Fe <sup>3+</sup> -PPIX<br>Sheep                            | 1 dimer<br>I222                              | (S)-Flurbiprofen Methylenelester<br> |
| 6V3R | 15 | 2.66 Å | COX-2<br>Fe <sup>3+</sup> -PPIX<br>Mouse                            | 2 dimers<br>C121                             | Harmaline Compound 3<br>             |

|      |    |        |                                                            |                                              |                                                                                                                                    |
|------|----|--------|------------------------------------------------------------|----------------------------------------------|------------------------------------------------------------------------------------------------------------------------------------|
| 1EQG | 3  | 2.61 Å | COX-1<br>Fe <sup>3+</sup> -PPIX<br>Sheep                   | 1 dimer<br>I222                              | (S)-Ibuprofen<br>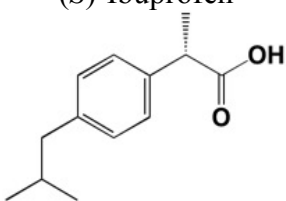                               |
| 4PH9 | 16 | 1.81 Å | COX-2<br>Fe <sup>3+</sup> -PPIX<br>Mouse                   | 1 dimer<br>I222                              | (S)-Ibuprofen<br>                               |
| 4RS0 | 17 | 2.81 Å | COX-2<br>Fe <sup>3+</sup> -PPIX<br>Mouse<br>H90W           | 1 monomer<br>I4 <sub>1</sub> 2 <sub>2</sub>  | (S)-Ibuprofen<br>                               |
| 4COX | 13 | 2.9 Å  | COX-2<br>Fe <sup>3+</sup> -PPIX<br>Mouse<br>N310Q<br>R333K | 2 dimers<br>P2 <sub>1</sub> 2 <sub>1</sub> 2 | Indomethacin<br>                              |
| 2OYE | 18 | 2.85 Å | COX-1<br>Fe <sup>3+</sup> -PPIX<br>Sheep                   | 1 monomer<br>P6 <sub>5</sub> 2 <sub>2</sub>  | Indomethacin-(R)-α-ethyl-<br>ethanolamide<br> |

|      |    |        |                                          |                                              |                                                                                                                              |
|------|----|--------|------------------------------------------|----------------------------------------------|------------------------------------------------------------------------------------------------------------------------------|
| 2OYU | 18 | 2.7 Å  | COX-1<br>Fe <sup>3+</sup> -PPIX<br>Sheep | 1 monomer<br>P6 <sub>5</sub> 22              | Indomethacin-(S)-α-ethyl-ethanolamide<br>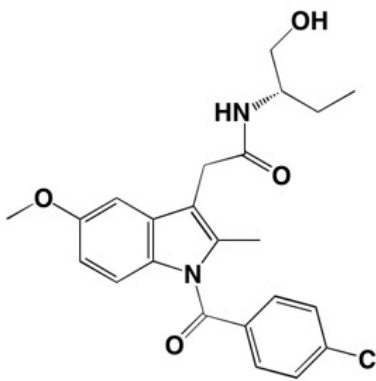 |
| 6BL4 | 19 | 2.22 Å | COX-2<br>Fe <sup>3+</sup> -PPIX<br>Mouse | 2 dimers<br>P2 <sub>1</sub> 2 <sub>1</sub> 2 | Indomethacin-dansyl conjugate 1<br>      |
| 6BL3 | 19 | 2.22 Å | COX-2<br>Fe <sup>3+</sup> -PPIX<br>Mouse | 2 dimers<br>P2 <sub>1</sub> 2 <sub>1</sub> 2 | Indomethacin-dansyl conjugate 2<br>      |

|      |    |        |                                          |                                              |                                                                                                                               |
|------|----|--------|------------------------------------------|----------------------------------------------|-------------------------------------------------------------------------------------------------------------------------------|
| 4OTJ | 20 | 2.11 Å | COX-2<br>Fe <sup>3+</sup> -PPIX<br>Mouse | 2 dimers<br>P2 <sub>1</sub> 2 <sub>1</sub> 2 | Indomethacin-podophyllotoxin conjugate<br>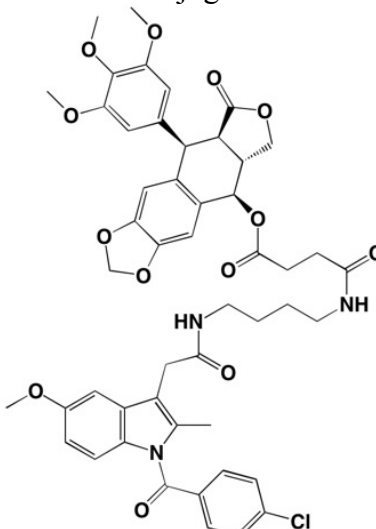 |
| 1PGF | 21 | 4.5 Å  | COX-1<br>Fe <sup>3+</sup> -PPIX<br>Sheep | 1 dimer<br>I222                              | Iodoindomethacin ( <i>E</i> )<br>         |
| 1PGG | 21 | 4.5 Å  | COX-1<br>Fe <sup>3+</sup> -PPIX<br>Sheep | 1 dimer<br>I222                              | Iodoindomethacin ( <i>Z</i> )<br>        |
| 1PGE | 21 | 3.5 Å  | COX-1<br>Fe <sup>3+</sup> -PPIX<br>Sheep | 1 dimer<br>I222                              | ( <i>S</i> )-Iodosuprofen<br>            |

|      |    |        |                                                      |                                             |                                                                                                                |
|------|----|--------|------------------------------------------------------|---------------------------------------------|----------------------------------------------------------------------------------------------------------------|
| 4M10 | 22 | 2.01 Å | COX-2<br>Fe <sup>3+</sup> -PPIX<br>Mouse             | 2 dimers<br>P22 <sub>1</sub> 2 <sub>1</sub> | <p>Isoxicam</p> 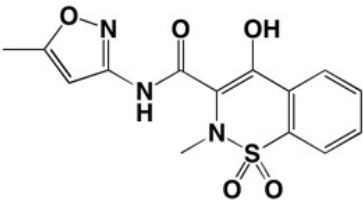            |
| 4OTY | 23 | 2.35 Å | COX-2<br>Apo<br>Mouse                                | 1 dimer<br>I222                             | <p>Lumiracoxib</p>          |
| 4RRZ | 17 | 2.57 Å | COX-2<br>Apo<br>Mouse<br>H90W                        | 2 dimers<br>C121                            | <p>Lumiracoxib</p>         |
| 4RRX | 17 | 2.78 Å | COX-2<br>Apo<br>Mouse<br>V89W                        | 1 dimer<br>I222                             | <p>Lumiracoxib</p>        |
| 5IKQ | 10 | 2.41 Å | COX-2<br>Co <sup>3+</sup> -PPIX<br>Human<br>Δ586-612 | 1 dimer<br>I222                             | <p>Meclofenamic Acid</p>  |
| 5IKR | 10 | 2.34 Å | COX-2<br>Co <sup>3+</sup> -PPIX<br>Human<br>Δ586-612 | 1 dimer<br>I222                             | <p>Mefenamic Acid</p>     |

|      |    |        |                                          |                                              |                                                                                                                           |
|------|----|--------|------------------------------------------|----------------------------------------------|---------------------------------------------------------------------------------------------------------------------------|
| 4O1Z | 22 | 2.4 Å  | COX-1<br>Fe <sup>3+</sup> -PPIX<br>Sheep | 1 dimer<br>P6 <sub>5</sub>                   | Meloxicam<br>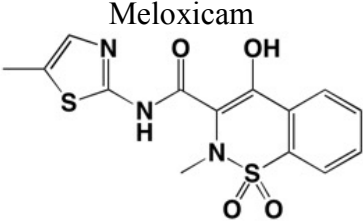                          |
| 4M11 | 22 | 2.45 Å | COX-2<br>Fe <sup>3+</sup> -PPIX<br>Mouse | 2 dimers<br>P2 <sub>2</sub> 1 <sub>2</sub> 1 | Meloxicam<br>                          |
| 1Q4G | 24 | 2.0 Å  | COX-1<br>Fe <sup>3+</sup> -PPIX<br>Sheep | 1 dimer<br>I222                              | (S)-α-Methyl-4-biphenylacetic Acid<br> |
| 4FM5 | 25 | 2.81 Å | COX-2<br>Fe <sup>3+</sup> -PPIX<br>Mouse | 2 dimers<br>P2 <sub>1</sub> 2 <sub>1</sub> 2 | des-Methyl-flurbiprofen<br>           |
| 3NTB | 26 | 2.27 Å | COX-2<br>Fe <sup>3+</sup> -PPIX<br>Mouse | 2 dimers<br>P2 <sub>1</sub> 2 <sub>1</sub> 2 | 6-Methylthio-(S)-naproxen<br>        |
| 5WBE | 27 | 2.75 Å | COX-1<br>Fe <sup>3+</sup> -PPIX<br>Sheep | 1 dimer<br>P6 <sub>5</sub>                   | Mofezolac<br>                        |



|      |    |        |                                                               |                            |                                                                                                     |
|------|----|--------|---------------------------------------------------------------|----------------------------|-----------------------------------------------------------------------------------------------------|
| 3NT1 | 26 | 1.73 Å | COX-2<br>Fe <sup>3+</sup> -PPIX<br>Mouse                      | 1 dimer<br>I222            | (S)-Naproxen<br>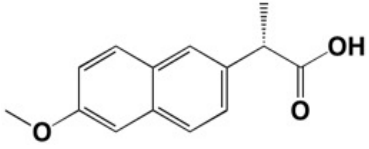 |
| 3Q7D | 14 | 2.4 Å  | COX-2<br>Fe <sup>3+</sup> -PPIX<br>Mouse                      | 1 dimer<br>I222            | (R)-Naproxen<br> |
| 3N8X | 5  | 2.75 Å | COX-1<br>Fe <sup>3+</sup> -PPIX<br>Sheep                      | 1 dimer<br>P6 <sub>5</sub> | Nimesulide<br>   |
| 3QMO | 28 | 3.0 Å  | COX-2<br>Co <sup>3+</sup> -PPIX<br>Mouse<br>N594A             | 1 dimer<br>I222            | NS-398<br>     |
| 5U6X | 27 | 2.93 Å | COX-1<br>Fe <sup>3+</sup> -PPIX<br>Sheep                      | 1 dimer<br>P6 <sub>5</sub> | P6<br>         |
| 5KIR | 29 | 2.7 Å  | COX-2<br>Co <sup>3+</sup> -PPIX<br>Human<br>Q350N<br>Δ586-612 | 1 dimer<br>I222            | Rofecoxib<br>  |

|      |    |        |                                                            |                 |                                                                                                         |
|------|----|--------|------------------------------------------------------------|-----------------|---------------------------------------------------------------------------------------------------------|
| NA   | 30 | 3.3 Å  | COX-2<br>Fe <sup>3+</sup> -PPIX<br>Human                   | 1 dimer<br>I222 | RS104897<br>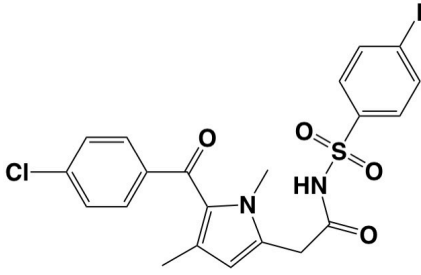          |
| NA   | 30 | 2.9 Å  | COX-2<br>Fe <sup>3+</sup> -PPIX<br>Human                   | 1 dimer<br>I222 | RS57067<br>           |
| 1PTH | 31 | 3.4 Å  | COX-1<br>Br-acetyl-<br>Fe <sup>3+</sup> -PPIX<br>Sheep     | 1 dimer<br>I222 | Salicylic Acid<br>  |
| 5F1A | 1  | 2.38 Å | COX-2<br>Co <sup>3+</sup> -PPIX<br>Human<br>Δ586-612       | 1 dimer<br>I222 | Salicylic Acid<br> |
| 6COX | 13 | 2.8 Å  | COX-2<br>Fe <sup>3+</sup> -PPIX<br>Mouse<br>N310Q<br>R333K | 1 dimer<br>I222 | SC-558<br>         |

|      |    |        |                                                            |                                              |                                                                                                            |
|------|----|--------|------------------------------------------------------------|----------------------------------------------|------------------------------------------------------------------------------------------------------------|
| 1CX2 | 13 | 3.0 Å  | COX-2<br>Fe <sup>3+</sup> -PPIX<br>Mouse<br>N310Q<br>R333K | 2 dimers<br>P2 <sub>1</sub> 2 <sub>1</sub> 2 | <p>SC-558</p> 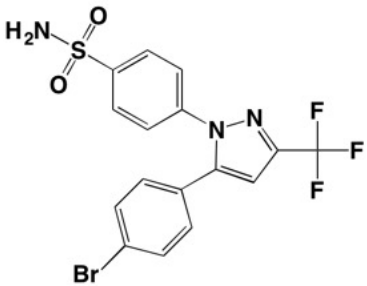          |
| 3MQE | 32 | 2.8 Å  | COX-2<br>Fe <sup>3+</sup> -PPIX<br>Mouse                   | 2 dimers<br>P2 <sub>1</sub> 2 <sub>1</sub> 2 | <p>(S)-SC-75416</p>     |
| 5IKT | 10 | 2.45 Å | COX-2<br>Co <sup>3+</sup> -PPIX<br>Human<br>Δ586-612       | 1 dimer<br>I222                              | <p>Tolfenamic Acid</p>  |
| 3NTG | 32 | 2.19 Å | COX-2<br>Fe <sup>3+</sup> -PPIX<br>Mouse                   | 2 dimers<br>P2 <sub>1</sub> 2 <sub>1</sub> 2 | <p>(R)-23d</p>         |
| 3LN0 | 6  | 2.2 Å  | COX-2<br>Fe <sup>3+</sup> -PPIX<br>Mouse                   | 2 dimers<br>P2 <sub>1</sub> 2 <sub>1</sub> 2 | <p>(S)-5c</p>         |
| 3N8V | 5  | 3.05 Å | COX-1<br>Fe <sup>3+</sup> -PPIX<br>Sheep                   | 1 dimer<br>P6 <sub>5</sub>                   | No ligand                                                                                                  |
| 5COX | 13 | 3.0 Å  | COX-2<br>Fe <sup>3+</sup> -PPIX<br>Mouse<br>N310Q<br>R333K | 2 dimers<br>P2 <sub>1</sub> 2 <sub>1</sub> 2 | No ligand                                                                                                  |

|      |    |        |                                                                            |                                              |                                                                                                           |
|------|----|--------|----------------------------------------------------------------------------|----------------------------------------------|-----------------------------------------------------------------------------------------------------------|
| 4RRW | 17 | 2.57 Å | COX-2<br>Apo<br>Mouse                                                      | 2 dimers<br>C121                             | No Ligand                                                                                                 |
| 4RRY | 17 | 2.43 Å | COX-2<br>Apo<br>Mouse<br>H90W                                              | 2 dimers<br>P2 <sub>1</sub> 2 <sub>1</sub> 2 | No Ligand                                                                                                 |
| 5FDQ | 1  | 1.9 Å  | COX-2<br>Co <sup>3+</sup> -PPIX<br>Mouse<br>S530T<br>N594A                 | 1 dimer<br>I222                              | No Ligand                                                                                                 |
| 5JVY | 7  | 2.36 Å | COX-2<br>Co <sup>3+</sup> -PPIX<br>Mouse<br>K82A<br>N86Q<br>I105V<br>S121P | 1 dimer<br>I222                              | No Ligand                                                                                                 |
| 1DIY | 33 | 3.0 Å  | COX-1<br>Co <sup>3+</sup> -PPIX<br>Sheep                                   | 1 monomer<br>P6 <sub>5</sub> 22              | Arachidonic Acid<br>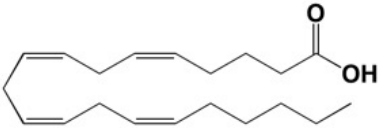 |
| 1U67 | 18 | 3.1 Å  | COX-1<br>Co <sup>3+</sup> -PPIX<br>Sheep<br>V349A<br>W387F                 | 1 monomer<br>P6 <sub>5</sub> 22              | Arachidonic Acid<br> |
| 1DDX | 34 | 3.0 Å  | COX-2<br>Apo<br>Mouse                                                      | 2 dimers<br>P2 <sub>1</sub> 2 <sub>1</sub> 2 | Arachidonic Acid<br> |
| 1CVU | 34 | 2.4 Å  | COX-2<br>Apo<br>Mouse<br>H207A<br>N310Q<br>R333K                           | 1 dimer<br>I222                              | Arachidonic Acid<br> |

|      |    |        |                                                            |                  |                                                                                                                  |
|------|----|--------|------------------------------------------------------------|------------------|------------------------------------------------------------------------------------------------------------------|
| 3HS5 | 35 | 2.1 Å  | COX-2<br>Co <sup>3+</sup> -PPIX<br>Mouse<br>N594A          | 1 dimer<br>I222  | Arachidonic Acid<br>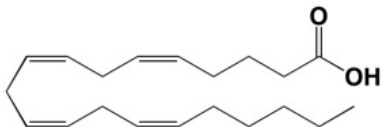          |
| 3KRK | 35 | 2.4 Å  | COX-2<br>Co <sup>3+</sup> -PPIX<br>Mouse<br>L531F<br>N594A | 1 dimer<br>I222  | Arachidonic Acid<br>          |
| 3OLT | 36 | 2.45 Å | COX-2<br>Co <sup>3+</sup> -PPIX<br>Mouse<br>R513H          | 1 dimer<br>I222  | Arachidonic Acid<br>          |
| 3TZI | 37 | 2.15 Å | COX-2<br>Co <sup>3+</sup> -PPIX<br>Mouse<br>G533V<br>N594A | 1 dimer<br>I222  | Arachidonic Acid<br>          |
| 6OFY | 38 | 2.2 Å  | COX-2<br>Co <sup>3+</sup> -PPIX<br>Mouse<br>V349I<br>N594A | 1 dimer<br>I222  | Arachidonic Acid<br>        |
| 3MDL | 36 | 2.2 Å  | COX-2<br>Co <sup>3+</sup> -PPIX<br>Mouse<br>N594A          | 1 dimer<br>I222  | 1-Arachidonoyl Glycerol<br>  |
| 3OLU | 36 | 2.35 Å | COX-2<br>Co <sup>3+</sup> -PPIX<br>Mouse<br>R513H          | 1 dimer<br>I222  | 1-Arachidonoyl Glycerol<br>  |
| 1FE2 | 39 | 3.0 Å  | COX-1<br>Co <sup>3+</sup> -PPIX<br>Sheep                   | 1 dimer<br>P6522 | Dihomo-γ-linolenic Acid<br> |

|      |    |        |                                                   |                    |                                                                                                                        |
|------|----|--------|---------------------------------------------------|--------------------|------------------------------------------------------------------------------------------------------------------------|
| 3HS7 | 35 | 2.65 Å | COX-2<br>Co <sup>3+</sup> -PPIX<br>Mouse<br>N594A | 1 dimer<br>I222    | Docosahexaenoic Acid<br>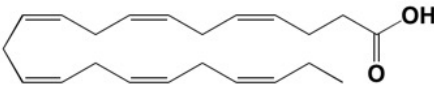             |
| 1IGX | 40 | 3.1 Å  | COX-1<br>Co <sup>3+</sup> -PPIX<br>Sheep          | 1 monomer<br>P6522 | Eicosapentaenoic Acid<br>           |
| 3HS6 | 35 | 2.4 Å  | COX-2<br>Co <sup>3+</sup> -PPIX<br>Mouse<br>N594A | 1 dimer<br>I222    | Eicosapentaenoic Acid<br>           |
| 1IGZ | 40 | 2.9 Å  | COX-1<br>Co <sup>3+</sup> -PPIX<br>Sheep          | 1 monomer<br>P6522 | Linoleic Acid<br>                    |
| 4E1G | 37 | 2.1 Å  | COX-2<br>Co <sup>3+</sup> -PPIX<br>Mouse<br>N594A | 1 dimer<br>I222    | $\alpha$ -Linolenic Acid<br>       |
| 4RUT | 41 | 2.16 Å | COX-2<br>Co <sup>3+</sup> -PPIX<br>Mouse          | 2 dimers<br>C121   | 13(S)-Methyl-arachidonic Acid<br> |
| 3QH0 | 42 | 2.1 Å  | COX-2<br>Co <sup>3+</sup> -PPIX<br>Mouse<br>N594A | 1 dimer<br>I222    | Palmitic Acid<br>                  |

1DDX 34 3.0 Å COX-2  
Apo 2 dimers  
Mouse P2<sub>1</sub>2<sub>1</sub>2

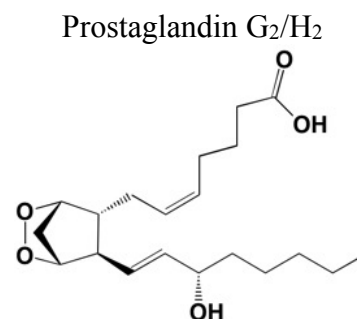

## References

- (1) Lucido, M. J.; Orlando, B. J.; Vecchio, A. J.; Malkowski, M. G. *Biochemistry* **2016**, *55*, 1226.
- (2) Loll, P. J.; Sharkey, C. T.; O'Connor, S. J.; Dooley, C. M.; O'Brien, E.; Devocelle, M.; Nolan, K. B.; Selinsky, B. S.; Fitzgerald, D. J. *Mol Pharmacol* **2001**, *60*, 1407.
- (3) Selinsky, B. S.; Gupta, K.; Sharkey, C. T.; Loll, P. J. *Biochemistry* **2001**, *40*, 5172.
- (4) Goodman, M. C.; Xu, S.; Rouzer, C. A.; Banerjee, S.; Ghebreselasie, K.; Migliore, M.; Piomelli, D.; Marnett, L. J. *J Biol Chem* **2018**.
- (5) Sidhu, R. S.; Lee, J. Y.; Yuan, C.; Smith, W. L. *Biochemistry* **2010**, *49*, 7069.
- (6) Wang, J. L.; Carter, J.; Kiefer, J. R.; Kurumbail, R. G.; Pawlitz, J. L.; Brown, D.; Hartmann, S. J.; Graneto, M. J.; Seibert, K.; Talley, J. J. *Bioorg Med Chem Lett* **2010**, *20*, 7155.
- (7) Dong, L.; Yuan, C.; Orlando, B. J.; Malkowski, M. G.; Smith, W. L. *J Biol Chem* **2016**, *291*, 25641.
- (8) Neumann, W.; Xu, S.; Sarosi, M. B.; Scholz, M. S.; Crews, B. C.; Ghebreselasie, K.; Banerjee, S.; Marnett, L. J.; Hey-Hawkins, E. *ChemMedChem* **2016**, *11*, 175.
- (9) Rowlinson, S. W.; Kiefer, J. R.; Prusakiewicz, J. J.; Pawlitz, J. L.; Kozak, K. R.; Kalgutkar, A. S.; Stallings, W. C.; Kurumbail, R. G.; Marnett, L. J. *J Biol Chem* **2003**, *278*, 45763.
- (10) Orlando, B. J.; Malkowski, M. G. *J Biol Chem* **2016**, *291*, 15069.
- (11) Picot, D.; Loll, P. J.; Garavito, R. M. *Nature* **1994**, *367*, 243.
- (12) Gupta, K.; Selinsky, B. S.; Loll, P. J. *Acta Crystallogr D Biol Crystallogr* **2006**, *62*, 151.
- (13) Kurumbail, R. G.; Stevens, A. M.; Gierse, J. K.; McDonald, J. J.; Stegeman, R. A.; Pak, J. Y.; Gildehaus, D.; Miyashiro, J. M.; Penning, T. D.; Seibert, K.; Isakson, P. C.; Stallings, W. C. *Nature* **1996**, *384*, 644.
- (14) Duggan, K. C.; Hermanson, D. J.; Musee, J.; Prusakiewicz, J. J.; Scheib, J. L.; Carter, B. D.; Banerjee, S.; Oates, J. A.; Marnett, L. J. *Nat Chem Biol* **2011**, *7*, 803.
- (15) Uddin, M. J.; Xu, S.; Crews, B. C.; Ghebreselasie, K.; Banerjee, S.; Marnett, L. J. *ACS Med Chem Lett* **2020**, *in press*.
- (16) Orlando, B. J.; Lucido, M. J.; Malkowski, M. G. *J Struct Biol* **2015**, *189*, 62.
- (17) Blobaum, A. L.; Xu, S.; Rowlinson, S. W.; Duggan, K. C.; Banerjee, S.; Kudalkar, S. N.; Birmingham, W. R.; Ghebreselasie, K.; Marnett, L. J. *J Biol Chem* **2015**, *290*, 12793.
- (18) Harman, C. A.; Rieke, C. J.; Garavito, R. M.; Smith, W. L. *J Biol Chem* **2004**, *279*, 42929.
- (19) Xu, S.; Uddin, M. J.; Banerjee, S.; Duggan, K.; Musee, J.; Kiefer, J. R.; Ghebreselasie, K.; Rouzer, C. A.; Marnett, L. J. *J Biol Chem* **2019**, *294*, 8690.
- (20) Uddin, M. J.; Crews, B. C.; Xu, S.; Ghebreselasie, K.; Daniel, C. K.; Kingsley, P. J.; Banerjee, S.; Marnett, L. J. *ACS Chem Biol* **2016**, *11*, 3052.

- (21) Loll, P. J.; Picot, D.; Ekabo, O.; Garavito, R. M. *Biochemistry* **1996**, *35*, 7330.
- (22) Xu, S.; Hermanson, D. J.; Banerjee, S.; Ghebreselasie, K.; Clayton, G. M.; Garavito, R. M.; Marnett, L. J. *J Biol Chem* **2014**, *289*, 6799.
- (23) Windsor, M. A.; Valk, P. L.; Xu, S.; Banerjee, S.; Marnett, L. J. *Bioorg Med Chem Lett* **2013**, *23*, 5860.
- (24) Gupta, K.; Selinsky, B. S.; Kaub, C. J.; Katz, A. K.; Loll, P. J. *J Mol Biol* **2004**, *335*, 503.
- (25) Windsor, M. A.; Hermanson, D. J.; Kingsley, P. J.; Xu, S.; Crews, B. C.; Ho, W.; Keenan, C. M.; Banerjee, S.; Sharkey, K. A.; Marnett, L. J. *ACS Med Chem Lett* **2012**, *3*, 759.
- (26) Duggan, K. C.; Walters, M. J.; Musee, J.; Harp, J. M.; Kiefer, J. R.; Oates, J. A.; Marnett, L. J. *J Biol Chem* **2010**, *285*, 34950.
- (27) Cingolani, G.; Panella, A.; Perrone, M. G.; Vitale, P.; Di Mauro, G.; Fortuna, C. G.; Armen, R. S.; Ferorelli, S.; Smith, W. L.; Scilimati, A. *Eur J Med Chem* **2017**, *138*, 661.
- (28) Vecchio, A. J.; Malkowski, M. G. *J Struct Biol* **2011**, *176*, 254.
- (29) Orlando, B. J.; Malkowski, M. G. *Acta Crystallogr F Struct Biol Commun* **2016**, *72*, 772.
- (30) Luong, C.; Miller, A.; Barnett, J.; Chow, J.; Ramesha, C.; Browner, M. F. *Nat Struct Biol* **1996**, *3*, 927.
- (31) Loll, P. J.; Picot, D.; Garavito, R. M. *Nat Struct Biol* **1995**, *2*, 637.
- (32) Wang, J. L.; Limburg, D.; Graneto, M. J.; Springer, J.; Hamper, J. R.; Liao, S.; Pawlitz, J. L.; Kurumbail, R. G.; Maziasz, T.; Talley, J. J.; Kiefer, J. R.; Carter, J. *Bioorg Med Chem Lett* **2010**, *20*, 7159.
- (33) Malkowski, M. G.; Ginell, S. L.; Smith, W. L.; Garavito, R. M. *Science* **2000**, *289*, 1933.
- (34) Kiefer, J. R.; Pawlitz, J. L.; Moreland, K. T.; Stegeman, R. A.; Hood, W. F.; Gierse, J. K.; Stevens, A. M.; Goodwin, D. C.; Rowlinson, S. W.; Marnett, L. J.; Stallings, W. C.; Kurumbail, R. G. *Nature* **2000**, *405*, 97.
- (35) Vecchio, A. J.; Simmons, D. M.; Malkowski, M. G. *J Biol Chem* **2010**, *285*, 22152.
- (36) Vecchio, A. J.; Malkowski, M. G. *J Biol Chem* **2011**, *286*, 20736.
- (37) Vecchio, A. J.; Orlando, B. J.; Nandagiri, R.; Malkowski, M. G. *J Biol Chem* **2012**, *287*, 24619.
- (38) Dong, L.; Anderson, A. J.; Malkowski, M. G. *Biochemistry* **2019**, *58*, 3990.
- (39) Thuresson, E. D.; Malkowski, M. G.; Lakkides, K. M.; Rieke, C. J.; Mulichak, A. M.; Ginell, S. L.; Garavito, R. M.; Smith, W. L. *J Biol Chem* **2001**, *276*, 10358.
- (40) Malkowski, M. G.; Thuresson, E. D.; Lakkides, K. M.; Rieke, C. J.; Micielli, R.; Smith, W. L.; Garavito, R. M. *J Biol Chem* **2001**, *276*, 37547.
- (41) Kudalkar, S. N.; Nikas, S. P.; Kingsley, P. J.; Xu, S.; Galligan, J. J.; Rouzer, C. A.; Banerjee, S.; Ji, L.; Eno, M. R.; Makriyannis, A.; Marnett, L. J. *J Biol Chem* **2015**, *290*, 7897.
- (42) Dong, L.; Vecchio, A. J.; Sharma, N. P.; Jurban, B. J.; Malkowski, M. G.; Smith, W. L. *J Biol Chem* **2011**, *286*, 19035.



**Table S2. Summary table of site-directed mutations of cyclooxygenase isoforms**

| <b>Mutation</b> | <b>Isoform</b> | <b>%POX<sup>a</sup></b> | <b>%COX<sup>b</sup></b> | <b>Comments<sup>c</sup></b>                                                                                                                                                                                                                                                                                                                                       | <b>Ref</b> |
|-----------------|----------------|-------------------------|-------------------------|-------------------------------------------------------------------------------------------------------------------------------------------------------------------------------------------------------------------------------------------------------------------------------------------------------------------------------------------------------------------|------------|
| R44A            | COX-2          | NR                      | 42                      |                                                                                                                                                                                                                                                                                                                                                                   | 1          |
| R44Q            | COX-2          | NR                      | 58                      |                                                                                                                                                                                                                                                                                                                                                                   | 1          |
| V50C/E3232C/ ΔC | COX-2          | NR                      | 63                      | Dimer is not cross-linked upon oxidation.                                                                                                                                                                                                                                                                                                                         | 2          |
| F74C/ΔC         | COX-2          | NR                      | 50                      | Created for spin-label studies.                                                                                                                                                                                                                                                                                                                                   | 3          |
| L75C/ΔC         | COX-2          | NR                      | 70                      | Created for spin-label studies.                                                                                                                                                                                                                                                                                                                                   | 3          |
| T76C/ΔC         | COX-2          | NR                      | 60                      | Created for spin-label studies.                                                                                                                                                                                                                                                                                                                                   | 3          |
| R77C/ΔC         | COX-2          | NR                      | 50                      | Created for spin-label studies.                                                                                                                                                                                                                                                                                                                                   | 3          |
| I78C/ΔC         | COX-2          | NR                      | 70                      | Created for spin-label studies.                                                                                                                                                                                                                                                                                                                                   | 3          |
| K79C/ΔC         | COX-2          | NR                      | 70                      | Created for spin-label studies.                                                                                                                                                                                                                                                                                                                                   | 3          |
| L80C/ΔC         | COX-2          | NR                      | 70                      | Created for spin-label studies.                                                                                                                                                                                                                                                                                                                                   | 3          |
| F81C/ΔC         | COX-2          | NR                      | 50                      | Created for spin-label studies.                                                                                                                                                                                                                                                                                                                                   | 3          |
| L82C/ΔC         | COX-2          | NR                      | 40                      | Created for spin-label studies.                                                                                                                                                                                                                                                                                                                                   | 3          |
| N87C/ΔC         | COX-2          | NR                      | 60                      | Created for spin-label studies.                                                                                                                                                                                                                                                                                                                                   | 3          |
| T88C/ΔC         | COX-2          | NR                      | 40                      | Created for spin-label studies.                                                                                                                                                                                                                                                                                                                                   | 3          |
| V89C/ΔC         | COX-2          | NR                      | 60                      | Created for spin-label studies.                                                                                                                                                                                                                                                                                                                                   | 3          |
| V89W            | COX-2          | 77                      | 100                     | K <sub>MS</sub> : (AA) NC. k <sub>cat</sub> S: (AA) NC. Potencies: Ibuprofen ↑>45-fold, becomes time-dependent; Naproxen ↑9.8-fold, becomes time-dependent; Indomethacin NC; Indomethacin-dansyl conjugate 1 ↓1.8-fold; Indomethacin-dansyl conjugate 2 ↓3-fold; Diclofenac ↓1.9-fold; Celecoxib ↑2-fold; Rofecoxib ↑2.4-fold.                                    | 4,5        |
| V89W/H90W       | COX-2          | 68                      | 82                      | K <sub>MS</sub> : (AA) ↓69%. k <sub>cat</sub> S: (AA) ↓77%. Potencies: Ibuprofen ↑>97-fold, becomes time-dependent; Naproxen ↑15-fold, becomes time-dependent; Mefenamic acid ↑>54-fold, becomes time-dependent; Lumiracoxib ↑>150-fold, becomes time-dependent; Indomethacin ↓2.1-fold; Diclofenac NC; Flurbiprofen NC; Celecoxib ↓8-fold; Rofecoxib ↓4.5-fold.  | 4          |
| V89W/S119W      | COX-2          | 207                     | 82                      | K <sub>MS</sub> : (AA) ↓30%. k <sub>cat</sub> S: (AA) ↓38%. Potencies: Ibuprofen ↑>55-fold, becomes time-dependent; Naproxen ↑7-fold, becomes time-dependent; Mefenamic acid ↑>85-fold, becomes time-dependent; Lumiracoxib ↑>130-fold, becomes time-dependent; Indomethacin ↓1.9-fold; Diclofenac ↓1.7-fold; Flurbiprofen NC; Celecoxib ↓1.5-fold; Rofecoxib NC. | 4          |
| H90C/ΔC         | COX-2          | NR                      | 70                      | Created for spin-label studies                                                                                                                                                                                                                                                                                                                                    | 3          |

|                           |       |           |        |                                                                                                                                                                                                                                                                                                                                                                      |      |
|---------------------------|-------|-----------|--------|----------------------------------------------------------------------------------------------------------------------------------------------------------------------------------------------------------------------------------------------------------------------------------------------------------------------------------------------------------------------|------|
| H90W                      | COX-2 | 122       | 84     | $K_{MS}$ : (AA) NC. $k_{cat}$ : (AA) NC. Potencies: Ibuprofen $\uparrow$ >10-fold, becomes time-dependent; Naproxen $\uparrow$ 8-fold, becomes time-dependent; Indomethacin NC; Diclofenac NC; Celecoxib $\downarrow$ 6-fold; Rofecoxib $\downarrow$ 3.9-fold.                                                                                                       | 4    |
| Y91C/ $\Delta$ C          | COX-2 | NR        | 70     | Created for spin-label studies.                                                                                                                                                                                                                                                                                                                                      | 3    |
| I92C/ $\Delta$ C          | COX-2 | NR        | 60     | Created for spin-label studies.                                                                                                                                                                                                                                                                                                                                      | 3    |
| L93C/ $\Delta$ C          | COX-2 | NR        | 30     | Created for spin-label studies.                                                                                                                                                                                                                                                                                                                                      | 3    |
| G98C/ $\Delta$ C          | COX-2 | NR        | 35     | Created for spin-label studies.                                                                                                                                                                                                                                                                                                                                      | 3    |
| F99C/ $\Delta$ C          | COX-2 | NR        | 50     | Created for spin-label studies.                                                                                                                                                                                                                                                                                                                                      | 3    |
| W100C/ $\Delta$ C         | COX-2 | NR        | 10     | Created for spin-label studies.                                                                                                                                                                                                                                                                                                                                      | 3    |
| N101C/ $\Delta$ C         | COX-2 | NR        | 50     | Created for spin-label studies.                                                                                                                                                                                                                                                                                                                                      | 3    |
| V102C/ $\Delta$ C         | COX-2 | NR        | 30     | Created for spin-label studies.                                                                                                                                                                                                                                                                                                                                      | 3    |
| V103C/ $\Delta$ C         | COX-2 | NR        | 30     | Created for spin-label studies.                                                                                                                                                                                                                                                                                                                                      | 3    |
| N104C/ $\Delta$ C         | COX-2 | NR        | 30     | Created for spin-label studies.                                                                                                                                                                                                                                                                                                                                      | 3    |
| N105C/ $\Delta$ C         | COX-2 | NR        | 20     | Created for spin-label studies.                                                                                                                                                                                                                                                                                                                                      | 3    |
| Y115L/<br>S119V/<br>F357L | COX-2 | NR        | ~100   | Potencies: SC-58125 NC.                                                                                                                                                                                                                                                                                                                                              | 6    |
| S119A                     | COX-2 | NR        | NR     | Potencies: Indomethacin $\downarrow$ 2-fold; Indomethacin-dansyl conjugate 1 $\uparrow$ 2-fold; Indomethacin-dansyl conjugate 2 NC.                                                                                                                                                                                                                                  | 5    |
| S119W                     | COX-2 | 90        | 107    | $K_{MS}$ : (AA) NC. $k_{cat}$ : (AA) NC. Potencies: Ibuprofen NC; Naproxen NC; Indomethacin $\downarrow$ 3-fold; Diclofenac $\downarrow$ 3-fold; Celecoxib NC; Rofecoxib NC.                                                                                                                                                                                         | 4    |
| R120E                     | COX-1 | 5 or 0    | 5 or 0 | $K_{MS}$ : (AA) $\uparrow$ 120-fold. Potencies: Indomethacin $\downarrow$ >270-fold; Flurbiprofen $\downarrow$ >8000-fold; Ketoprofen $\downarrow$ >400-fold; Ibuprofen $\downarrow$ >2.4-fold; Diclofenac $\downarrow$ 43-fold; Meclofenamic acid $\downarrow$ 100-fold; DuP697 $\uparrow$ 12-fold; L-746,483 $\uparrow$ 12-fold. Residual activities: Aspirin 60%. | 7-9  |
| R120K                     | COX-1 | 62 or 120 | 15     | $K_{MS}$ : (AA) $\uparrow$ 22-fold or 41-fold.                                                                                                                                                                                                                                                                                                                       | 8,9  |
| R120Q                     | COX-1 | 65 or 122 | 5      | $K_{MS}$ : (AA) $\uparrow$ 820-fold or 2,700-fold. Reduced rate of suicide inactivation. Potencies: Ibuprofen $\downarrow$ 200-fold; Flurbiprofen (instantaneous) $\downarrow$ 200-fold and no longer time-dependent; <i>O</i> -acetylsalicylhydroxamic acid $\downarrow$ ; aspirin $\downarrow$ .                                                                   | 8-10 |

|             |       |                 |                    |                                                                                                                                                                                                                                                                                                                                                                                                                                                                                                                                                                                                                                    |                        |
|-------------|-------|-----------------|--------------------|------------------------------------------------------------------------------------------------------------------------------------------------------------------------------------------------------------------------------------------------------------------------------------------------------------------------------------------------------------------------------------------------------------------------------------------------------------------------------------------------------------------------------------------------------------------------------------------------------------------------------------|------------------------|
| R120A       | COX-2 | 92 or 99<br>104 | 23 or 50<br>or 106 | K <sub>MS</sub> : (AA) ↑3.4-fold. k <sub>cat</sub> S; (AA) NC.<br>Oxygenation: (LA) ↓; (αα) ↓; (SA) ↓; (EPA) ↓; (2-AG) ↓ but stimulated by 13-Me-AA.<br>Potencies: Indomethacin ↓>12-fold or >240-fold; Indomethacin-dansyl conjugate 1 ↑2.7-fold; Indomethacin-dansyl conjugate 2 ↑4.7-fold; Ketorolac ↓ >380-fold;<br>Piroxicam ↓110-fold; Naproxen ↓ 100%;<br>Diclofenac ↓ 3.3-fold; Meclofenamic acid ↓3.2-fold or 4.7-fold; Ibuprofen ↓;<br>Indomethacin esters/amides NC or ↓;<br>Meclofenamic acid esters/amides NC.<br>Aspirin acetylation: ↓>81%. Slow phase binding rate of a fluorescent indomethacin amide: ↑3.9-fold. | 1, 5,<br>11-18         |
| R120E       | COX-2 | NR              | 12                 | K <sub>MS</sub> : (AA) ↑32-fold. Potencies: NS-398 ↓1000-fold; Flosulide ↓680-fold;<br>Flurbiprofen ↓960-fold; Indomethacin ↓48-fold; L-761,066 ↓21-fold; Diclofenac ↓4.5-fold; Meclofenamic acid ↓5.5-fold; L-746,483 ↓2-fold; DuP697 NC; L-745,296 ↑4-fold; L588-983 ↑3-fold.                                                                                                                                                                                                                                                                                                                                                    | 19                     |
| R120L       | COX-2 | 17              | 20                 |                                                                                                                                                                                                                                                                                                                                                                                                                                                                                                                                                                                                                                    | 20                     |
| R120Q       | COX-2 | 79 or 132       | 86 or 100 or 174   | K <sub>MS</sub> : (AA) NC. Oxygenation: (2-AG) ↓90% but stimulated by 13-Me-AA; (AEA) ↓75%.<br>Potencies: flurbiprofen (instantaneous) ↓500-fold, no longer time-dependent; NS-398 (instantaneous) ↑5-fold, no longer time-dependent; DuP697 ↑1,000-fold; SC-58125 ↑>400-fold; Indomethacin ↓12-fold or NC; Naproxen ↑2-fold; Indomethacin esters/amides NC. Indomethacin podophylotoxin conjugate ↑3.2-fold.<br>Aspirin acetylation: ↓>73%. Slow phase binding rate of a fluorescent indomethacin amide: ↑3.5-fold.                                                                                                               | 11-<br>14,17,<br>20-24 |
| R120A/G533A | COX-2 | 104             | 0                  | Oxygenation: (LA) ↓100%; (αLA) ↓100%; (SA) ↓100%; (EPA) ↓.                                                                                                                                                                                                                                                                                                                                                                                                                                                                                                                                                                         | 18                     |
| S121G       | COX-2 | NR              | 93                 |                                                                                                                                                                                                                                                                                                                                                                                                                                                                                                                                                                                                                                    | 1                      |
| S121P       | COX-2 | NR              | 180                | K <sub>MS</sub> : (AA) NC; (DHLA) ↓1.3-fold.<br>Potencies: Naproxen ↓; Flurbiprofen ↓;<br>Diclofenac NC; Celecoxib NC.                                                                                                                                                                                                                                                                                                                                                                                                                                                                                                             | 1                      |
| H122N       | COX-2 | NR              | 110                |                                                                                                                                                                                                                                                                                                                                                                                                                                                                                                                                                                                                                                    | 1                      |
| H122P       | COX-2 | NR              | 53                 |                                                                                                                                                                                                                                                                                                                                                                                                                                                                                                                                                                                                                                    | 1                      |
| L123A       | COX-2 | NR              | 120                |                                                                                                                                                                                                                                                                                                                                                                                                                                                                                                                                                                                                                                    | 1                      |
| I124A       | COX-2 | NR              | 75                 |                                                                                                                                                                                                                                                                                                                                                                                                                                                                                                                                                                                                                                    | 1                      |
| D125A       | COX-2 | NR              | 65                 |                                                                                                                                                                                                                                                                                                                                                                                                                                                                                                                                                                                                                                    | 1                      |
| D125P       | COX-2 | NR              | 53                 |                                                                                                                                                                                                                                                                                                                                                                                                                                                                                                                                                                                                                                    | 1                      |

|                                      |       |     |           |                                                                                                                                                        |             |
|--------------------------------------|-------|-----|-----------|--------------------------------------------------------------------------------------------------------------------------------------------------------|-------------|
| S126C/ΔC                             | COX-2 | NR  | 91 or 100 | Dimer is not cross-linked upon oxidation.                                                                                                              | 1,2         |
| S126C/A543C/ΔC                       | COX-2 | NR  | 65        | Dimer is cross-linked upon oxidation. Cross-linking inhibited by flurbiprofen.                                                                         | 2           |
| P127C/ ΔC                            | COX-2 | NR  | 80 or 89  | Dimer is not cross-linked upon oxidation.                                                                                                              | 1,2         |
| P127C/S541C/ΔC                       | COX-2 | NR  | 56        | Dimer is cross-linked upon oxidation. Cross-linking inhibited by flurbiprofen.                                                                         | 2           |
| S138C/L334C/ΔC                       | COX-2 | NR  | NR        | Dimer is not cross-linked upon oxidation.                                                                                                              | 2           |
| Y148F                                | COX-2 | 70  | 100       | K <sub>MS</sub> : (AA) ↑1.5-fold. No effect on tyrosyl radical migration.                                                                              | 25          |
| Y148F/Y348F/<br>Y404F/Y504F          | COX-2 | 70  | 75        | K <sub>MS</sub> : (AA) ↑2.0-fold. Prevents tyrosyl radical migration.                                                                                  | 25          |
| Y148F/Y348F/<br>Y385/Y404F/<br>Y504F | COX-2 | 45  | 0         | No tyrosyl radical signal detected.                                                                                                                    | 25          |
| Q203N                                | COX-2 | 109 | 55        |                                                                                                                                                        | 26          |
| Q203R                                | COX-2 | 2   | 3         |                                                                                                                                                        | 26          |
| Q203V                                | COX-2 | 1   | NR        |                                                                                                                                                        | 26          |
| F205A                                | COX-1 | 90  | 28        | K <sub>MS</sub> : (AA) ↑1.5-fold. Oxygenation: (EPA) ↓1.9-fold; (LA) ↓12-fold; (DHLLA) ↓4.8-fold. Products: (AA) %11-HETE ↑4.4-fold, %15-HETE ↑2-fold. | 9,27,<br>28 |
| F205L                                | COX-1 | 106 | 65        | Oxygenation: (EPA) NC; (LA) ↓2-fold; (DHLLA) ↓2.5-fold. Products: (AA) %11-HETE ↑2-fold, %15-HETE NC.                                                  | 9,27,<br>28 |
| F205A                                | COX-2 | 42  | 29        | K <sub>MS</sub> : (AA) NC. k <sub>catS</sub> : (AA) ↓3.4-fold.                                                                                         | 18          |
| F205L                                | COX-2 | 137 | 71        | K <sub>MS</sub> : (AA) ↑1.8-fold. k <sub>catS</sub> : (AA) ↓1.4-fold.                                                                                  | 18          |
| F205V                                | COX-2 | 89  | 51        | K <sub>MS</sub> : (AA) NC. k <sub>catS</sub> : (AA) ↓2.0-fold.                                                                                         | 18          |
| H207A                                | COX-2 | 2   | 31        | Peroxidase catalyzes predominantly one-electron reductions.                                                                                            | 26          |
| F209A                                | COX-1 | 55  | 15        | K <sub>MS</sub> : (AA) ↑5-fold. Oxygenation: (EPA) ↓50-fold; (LA) ↓25-fold; (DHLLA) ↓14-fold. Products: (AA) %11-HETE ↑5-fold, %15-HETE NC.            | 9,27,<br>28 |
| F209L                                | COX-1 | 104 | 43        | K <sub>MS</sub> : (AA) ↑1.5-fold. Oxygenation: (EPA) ↓3-fold; (LA) ↓4.8-fold; (DHLLA) ↓2.1-fold. Products: (AA) %11-HETE ↑2-fold, %15-HETE NC.         | 9,27,<br>28 |
| F209A                                | COX-2 | 88  | 37        | K <sub>MS</sub> : (AA) ↑1.6-fold. k <sub>catS</sub> : (AA) ↓2.7-fold.                                                                                  | 18          |
| F209L                                | COX-2 | 207 | 129       | K <sub>MS</sub> : (AA) NC. k <sub>catS</sub> : (AA) NC                                                                                                 | 18          |
| F209V                                | COX-2 | 145 | 98        | K <sub>MS</sub> : (AA) ↑1.5-fold. k <sub>catS</sub> : (AA) NC                                                                                          | 18          |
| K211A                                | COX-1 | NR  | 8         |                                                                                                                                                        | 29          |
| K211E                                | COX-1 | NR  | 2         |                                                                                                                                                        | 29          |
| K211A/K215A                          | COX-1 | NR  | 8         |                                                                                                                                                        | 29          |
| K211E/K215E                          | COX-1 | NR  | 5         |                                                                                                                                                        | 29          |
| K211A/K222A                          | COX-1 | NR  | 5         |                                                                                                                                                        | 29          |
| K211E/K222E                          | COX-1 | NR  | 3         |                                                                                                                                                        | 29          |

|                        |       |                 |                 |                                                                                                                                                                                                     |              |
|------------------------|-------|-----------------|-----------------|-----------------------------------------------------------------------------------------------------------------------------------------------------------------------------------------------------|--------------|
| K211A//K215A/<br>K222A | COX-1 | NR              | 2               |                                                                                                                                                                                                     | 29           |
| K211E//K215E/<br>K222E | COX-1 | NR              | 3               |                                                                                                                                                                                                     | 29           |
| K215A                  | COX-1 | NR              | 75              |                                                                                                                                                                                                     | 29           |
| K215E                  | COX-1 | NR              | 110             |                                                                                                                                                                                                     | 29           |
| K215A/K222A            | COX-1 | NR              | 55              |                                                                                                                                                                                                     | 29           |
| K215E/K222E            | COX-1 | NR              | 45              |                                                                                                                                                                                                     | 29           |
| K222A                  | COX-1 | NR              | 78              |                                                                                                                                                                                                     | 29           |
| K222E                  | COX-1 | NR              | 90              |                                                                                                                                                                                                     | 29           |
| V228F                  | COX-2 | 87              | 20              | Products: (AA) %11-HETE NC, %15-HETE NC. Unable to make HETEs after acetylation.                                                                                                                    | 30           |
| R242H                  | COX-2 | 79              | 73              | K <sub>MS</sub> : (AA) NC; (EPA) NC. No effect on activation or inactivation.                                                                                                                       | 31           |
| Y254F                  | COX-1 | 94              | 104             |                                                                                                                                                                                                     | 32           |
| Y262F                  | COX-1 | 66              | 73              |                                                                                                                                                                                                     | 32           |
| C313S                  | COX-1 | 32              | 19              | K <sub>MS</sub> : (AA) ↓3.3-fold. Potencies: Flurbiprofen NC. No effect on dimer formation, glycosylation, or inactivation by maleimides.                                                           | 33           |
| C313S/C540S/ΔC         | COX-2 | NR              | 70 or 100       | Created for spin-label studies. Dimer not cross-linked upon oxidation.                                                                                                                              | 2,3          |
| Y348F                  | COX-1 | 76              | 83              | K <sub>MS</sub> : (AA) NC. Products: (AA) %11-HETE NC, %15-HETE NC.                                                                                                                                 | 9            |
| Y348L                  | COX-1 | 9               | 0               |                                                                                                                                                                                                     | 9            |
| Y348W                  | COX-1 | 0               | 0               |                                                                                                                                                                                                     | 9            |
| Y348F                  | COX-2 | 46 or 94 or 106 | 46 or 75 or 106 | K <sub>MS</sub> : (AA) ↑1.8-fold. Potencies: Diclofenac NC. Aspirin acetylation: ↓58%. Disrupts Y348-Y385 hydrogen bond. No effect on tyrosyl radical migration.                                    | 12,16, 25,34 |
| Y348F/Y504F            | COX-2 | 111             | 81              | K <sub>MS</sub> : (AA) ↑1.6-fold. Potencies: Nimesulide ↑4.8-fold. Disrupts Y348-Y385 hydrogen bond and radical transfer to Y504. Unable to make HETEs after acetylation.                           | 34           |
| V349A                  | COX-1 | 52              | 55              | K <sub>MS</sub> : (AA) NC; (EPA) ↑100-fold; (LA) ↑11-fold; (DHLA) ↑31-fold. Oxygenation: (EPA) ↓10-fold; (LA) ↓15-fold; (DHLA) ↓25-fold. Products: (AA) %11-HETE ↑21-fold (100% R), %15-HETE ↓100%. | 9,27, 28,35  |
| V349I                  | COX-1 | NR              | NR              | Products: (AA) 15(R)-PGH <sub>2</sub> :15(S)-PGH <sub>2</sub> ↑, 15(R)-HETE:15(S)-HETE ↑, 11(R)-HETE:11(S)-HETE NC.                                                                                 | 36           |

|                             |       |     |    |                                                                                                                                                                                                                                                                                                                                                                                          |                        |
|-----------------------------|-------|-----|----|------------------------------------------------------------------------------------------------------------------------------------------------------------------------------------------------------------------------------------------------------------------------------------------------------------------------------------------------------------------------------------------|------------------------|
| V349L                       | COX-1 | 117 | 63 | K <sub>MS</sub> : (AA) ↑3.5-fold; (EPA) ↑250-fold; (LA) ↑53-fold; (DHLA) ↑6.4-fold. Oxygenation: (EPA) ↓3.2-fold; (LA) ↓7.1-fold; (DHLA) ↓2.9-fold. Products: (AA) %11-HETE ↓100%, %15-HETE ↑9.6-fold (54% S), 15(R)-PGH <sub>2</sub> :15(S)-PGH <sub>2</sub> ↑.                                                                                                                         | 9,27, 28,36            |
| V349N                       | COX-1 | NR  | NR | Products: (AA) 15(R)-PGH <sub>2</sub> :15(S)-PGH <sub>2</sub> ↑, 11(R)-HETE:11(S)-HETE NC.                                                                                                                                                                                                                                                                                               | 36                     |
| V349S                       | COX-1 | 94  | 43 | K <sub>MS</sub> : (AA) ↑7-fold. Products: (AA) %11-HETE ↑16-fold (100% R), %15-HETE ↓100%.                                                                                                                                                                                                                                                                                               | 9                      |
| V349T                       | COX-1 | 136 | 39 | K <sub>MS</sub> : (AA) ↑7-fold. Products: (AA) %11-HETE ↑2.2-fold (100% R), %15-HETE ↓4-fold, 15(R)-PGH <sub>2</sub> :15(S)-PGH <sub>2</sub> NC.                                                                                                                                                                                                                                         | 9,36                   |
| V349A/S353T                 | COX-1 | 49  | 3  | Oxygenation: (EPA) ↓100%; (LA) ↓100%; (DHLA) ↓100%. Products: (AA) %11-HETE ↑11-fold, %15-HETE ↑4.8-fold.                                                                                                                                                                                                                                                                                | 9,27, 28               |
| V349A/W387F                 | COX-1 | NR  | NR | K <sub>MS</sub> : (AA) NC. Products: (AA) 11-HETE >84% of total.                                                                                                                                                                                                                                                                                                                         | 35                     |
| V349A/I523V                 | COX-1 | NR  | 56 | Oxygenation: (DHLA) ↓16-fold.                                                                                                                                                                                                                                                                                                                                                            | 28                     |
| V349A/I434V/<br>H513R/I523V | COX-1 | NR  | 50 | K <sub>MS</sub> : (AA) ↑1.5-fold; (DHLA) ↑60-fold. Oxygenation: (DHLA) ↓16-fold;                                                                                                                                                                                                                                                                                                         | 28                     |
| V349A                       | COX-2 | NR  | 59 | K <sub>MS</sub> : (AA) NC; (DHLA) NC. Oxygenation: (DHLA) ↓ 2.2-fold; (2-AG) ↓ but stimulated by 13-Me-AA. Products: (AA) 15(R)-PGH <sub>2</sub> :15(S)-PGH <sub>2</sub> NC, 15-HETE ↓100%, 11(R)-HETE:11(S)-HETE NC; (2-AG) %HETE-G ↑; (AEA) %HETE-EA ↑. Potencies: Indomethacin ↑3.1-fold; 2- <i>des</i> -methyl-Indomethacin ↓>4-fold; Diclofenac ↓; Naproxen ↓4-fold; Lumiracoxib I. | 11,14, 21,22, 28,36-38 |
| V349I                       | COX-2 | NR  | NR | Products: (AA) 15(R)-PGH <sub>2</sub> :15(S)-PGH <sub>2</sub> ↑, 15(R)-HETE:15(S)-HETE ↑, 11(R)-HETE:11(S)-HETE NC. Potencies: Indomethacin ↓1.8-fold; 2- <i>des</i> -methyl-Indomethacin NC; Diclofenac NC; Lumiracoxib ↑>35-fold; Naproxen ↑3-fold.                                                                                                                                    | 11,36-38               |

|             |       |           |     |                                                                                                                                                                                                                                                                                                                             |                     |
|-------------|-------|-----------|-----|-----------------------------------------------------------------------------------------------------------------------------------------------------------------------------------------------------------------------------------------------------------------------------------------------------------------------------|---------------------|
| V349L       | COX-2 | NR        | NR  | Products: (AA) 15(R)-PGH <sub>2</sub> :15(S)-PGH <sub>2</sub> ↑, 15(R)-HETE:15(S)-HETE ↑, 11(R)-HETE:11(S)-HETE NC; (2-AG) %HETE-Gs ↑. (AEA) %HETE-EAs ↑. Potencies: Indomethacin ↓8.0-fold or 16-fold; 2-Desmethyl-indomethacin ↓>4-fold; Diclofenac ↓; Indomethacin-podophylotoxin conjugate ↓>14-fold; Naproxen ↑4-fold. | 11,21, 22,24, 36-38 |
| V349N       | COX-2 | NR        | NR  | Products: (AA) 15(R)-PGH <sub>2</sub> :15(S)-PGH <sub>2</sub> ↑, 15(R)-HETE:15(S)-HETE ↑, 11(R)-HETE:11(S)-HETE NC.                                                                                                                                                                                                         | 36                  |
| V349T       | COX-2 | NR        | NR  | Products: (AA) 15(R)-PGH <sub>2</sub> :15(S)-PGH <sub>2</sub> NC, 15(R)-HETE:15(S)-HETE ↑, 11(R)-HETE:11(S)-HETE NC.                                                                                                                                                                                                        | 36                  |
| V349A/V523I | COX-2 | NR        | 7.5 | Oxygenation: (DHLA) ↓ 38-fold                                                                                                                                                                                                                                                                                               | 28                  |
| L352V       | COX-1 | NR        | 34  | Oxygenation: (EPA) ↓1.7-fold; (LA) ↓4.8-fold; (DHLA) ↓2.7-fold.                                                                                                                                                                                                                                                             | 27,28               |
| S353A       | COX-1 | 60        | 56  | Oxygenation: (EPA) ↓2.5-fold; (LA) ↓2.9-fold; (DHLA) ↓1.9-fold.                                                                                                                                                                                                                                                             | 9,27, 28            |
| S353G       | COX-1 | 87        | 61  | K <sub>MS</sub> : (AA) NC. Oxygenation: (EPA) ↓2.9-fold; (LA) ↓7.7-fold; (DHLA) NC. Products: (AA) %11-HETE ↑1.5-fold, %15-HETE NC.                                                                                                                                                                                         | 9,27, 28            |
| S353T       | COX-1 | 46        | 42  | Oxygenation: (EPA) NC; (LA) ↓3.1-fold; (DHLA) ↓3.1-fold. Products: (AA) %11-HETE ↑5.5-fold, %15-HETE ↑4.8-fold.                                                                                                                                                                                                             | 9,27, 28            |
| Y355A       | COX-1 | 84        | 10  | K <sub>MS</sub> : (AA) ↑5-fold. Products: (AA) %11-HETE ↑3-fold, %15-HETE NC.                                                                                                                                                                                                                                               | 9                   |
| Y355F       | COX-1 | 88 or 130 | 19  | K <sub>MS</sub> : (AA) ↑5-fold. Oxygenation: (EPA) ↓3-fold; (LA) ↓100%; (DHLA) ↓2.7-fold. Products: (AA) %11-HETE ↑2-fold, %15-HETE NC. Potencies: Ibuprofen NC but loss of stereoselectivity.                                                                                                                              | 8,9,27, 28,32       |
| Y355L       | COX-1 | 82        | 10  | K <sub>MS</sub> : (AA) ↑1.9-fold. Products (AA) %11-HETE ↑1.6-fold, %15-HETE NC.                                                                                                                                                                                                                                            | 9                   |
| Y355A       | COX-2 | NR        | NR  | Oxygenation: (2-AG) ↓ but stimulated by 13-Me-AA. Binding of a fluorescent indomethacin amide: ↓100%.                                                                                                                                                                                                                       | 14,17               |

|       |       |     |     |                                                                                                                                                                                                                                                                                                                                                                                                                                                                                                                                                                                                                                                                                                                                                                                                                                                                  |                      |
|-------|-------|-----|-----|------------------------------------------------------------------------------------------------------------------------------------------------------------------------------------------------------------------------------------------------------------------------------------------------------------------------------------------------------------------------------------------------------------------------------------------------------------------------------------------------------------------------------------------------------------------------------------------------------------------------------------------------------------------------------------------------------------------------------------------------------------------------------------------------------------------------------------------------------------------|----------------------|
| Y355F | COX-2 | 90  | 47  | $K_{MS}$ : (AA) $\uparrow$ 2.4-fold or NC; (2-AG) NC or $\downarrow$ 3.1-fold; (AEA) $\downarrow$ 1.7-fold. $k_{catS}$ : (AA) $\downarrow$ 2.1-fold or $\downarrow$ 1.8-fold; (2-AG) $\downarrow$ 1.8-fold or NC; (AEA) $\downarrow$ 1.6-fold. Sigmoidal [S] vs V curve for AA. Oxygenation: (2-AG) $\downarrow$ 20% but stimulated by 13-Me-AA; (AEA) NC. Potencies: Indomethacin $\downarrow$ >16-fold, 24-fold, or 240-fold; Ketorolac $\downarrow$ >380-fold; Meclofenamic acid $\downarrow$ >23-fold or $\downarrow$ >130-fold; Piroxicam $\downarrow$ >110-fold; Ibuprofen $\downarrow$ ; Indomethacin esters/amides I; Indomethacin-podophyllotoxin conjugate $\downarrow$ >14-fold; Meclofenamic acid esters/amides I; Diclofenac $\downarrow$ 1.8-fold; ARN-2508 $\downarrow$ 2.5-fold. Binding of a fluorescent indomethacin amide: $\downarrow$ 100%. | 13-17,21,22,24,39-41 |
| I377V | COX-1 | 110 | 72  | $K_{MS}$ : (AA) $\downarrow$ 1.8. Oxygenation: (EPA) $\downarrow$ 1.7-fold; (LA) $\downarrow$ 1.8-fold; (DHLLA) $\downarrow$ 1.6-fold. Products: (AA) %11-HETE $\uparrow$ 4-fold, %15-HETE NC.                                                                                                                                                                                                                                                                                                                                                                                                                                                                                                                                                                                                                                                                   | 9,27,28              |
| I377A | COX-2 | 0   | 0   | Likely misfolded.                                                                                                                                                                                                                                                                                                                                                                                                                                                                                                                                                                                                                                                                                                                                                                                                                                                | 18                   |
| I377F | COX-2 | 0   | 0   | Likely misfolded.                                                                                                                                                                                                                                                                                                                                                                                                                                                                                                                                                                                                                                                                                                                                                                                                                                                | 18                   |
| I377L | COX-2 | 72  | 72  | $K_{MS}$ : (AA) NC. $k_{catS}$ : (AA) NC.                                                                                                                                                                                                                                                                                                                                                                                                                                                                                                                                                                                                                                                                                                                                                                                                                        | 18                   |
| I377V | COX-2 | 92  | 86  | $K_{MS}$ : (AA) NC. $k_{catS}$ : (AA) NC.                                                                                                                                                                                                                                                                                                                                                                                                                                                                                                                                                                                                                                                                                                                                                                                                                        | 18                   |
| F381A | COX-1 | 101 | 4   | $K_{MS}$ : (AA) $\uparrow$ 3-fold. Oxygenation: (EPA) $\downarrow$ 5.8-fold; (LA) $\downarrow$ 50-fold; (DHLLA) $\downarrow$ 40-fold. Products: (AA) %11-HETE $\uparrow$ 3.5-fold, %15-HETE $\uparrow$ 1.6-fold.                                                                                                                                                                                                                                                                                                                                                                                                                                                                                                                                                                                                                                                 | 9,27,28              |
| F381L | COX-1 | 74  | 21  | Oxygenation: (EPA) $\downarrow$ 4.7-fold; (LA) $\downarrow$ 9.2-fold; (DHLLA) $\downarrow$ 5.8-fold. Products: (AA) %11-HETE $\uparrow$ 2.8-fold, %15-HETE $\uparrow$ 1.6-fold.                                                                                                                                                                                                                                                                                                                                                                                                                                                                                                                                                                                                                                                                                  | 9,27,28              |
| F381A | COX-2 | 0   | 0   | Likely misfolded.                                                                                                                                                                                                                                                                                                                                                                                                                                                                                                                                                                                                                                                                                                                                                                                                                                                | 18                   |
| F381L | COX-2 | 0   | 0   | Likely misfolded.                                                                                                                                                                                                                                                                                                                                                                                                                                                                                                                                                                                                                                                                                                                                                                                                                                                | 18                   |
| F381V | COX-2 | 0   | 0   | Likely misfolded.                                                                                                                                                                                                                                                                                                                                                                                                                                                                                                                                                                                                                                                                                                                                                                                                                                                | 18                   |
| N382A | COX-2 | 77  | 94  | $K_{MS}$ : (AA) $\uparrow$ 2-fold. Self-inactivation rate: NC. GSH Px resistance: NC.                                                                                                                                                                                                                                                                                                                                                                                                                                                                                                                                                                                                                                                                                                                                                                            | 42                   |
| N382D | COX-2 | 65  | 76  | $K_{MS}$ : (AA) NC. Self-inactivation rate: $\downarrow$ 1.7-fold. GSH Px resistance: NC.                                                                                                                                                                                                                                                                                                                                                                                                                                                                                                                                                                                                                                                                                                                                                                        | 42                   |
| N382L | COX-2 | 46  | 103 | $K_{MS}$ : (AA) NC. Self-inactivation rate: $\downarrow$ 2.3-fold. GSH Px resistance: $\uparrow$ 1.6-fold.                                                                                                                                                                                                                                                                                                                                                                                                                                                                                                                                                                                                                                                                                                                                                       | 42                   |
| T383D | COX-2 | 280 | 110 | $K_{MS}$ : (AA) NC. Self-inactivation rate: NC. GSH Px resistance: $\downarrow$ 1.6-fold.                                                                                                                                                                                                                                                                                                                                                                                                                                                                                                                                                                                                                                                                                                                                                                        | 42                   |
| T383H | COX-2 | 190 | 120 | $K_{MS}$ : (AA) $\uparrow$ 1.8-fold. Self-inactivation rate: NC. GSH Px resistance: $\downarrow$ 1.7-fold.                                                                                                                                                                                                                                                                                                                                                                                                                                                                                                                                                                                                                                                                                                                                                       | 42                   |
| L384A | COX-1 | 61  | 29  | Oxygenation: (DHLLA) $\downarrow$ 3-fold. Products: (AA) %11-HETE NC, %15-HETE $\uparrow$ 1.5-fold.                                                                                                                                                                                                                                                                                                                                                                                                                                                                                                                                                                                                                                                                                                                                                              | 9,28                 |



|                           |       |            |     |                                                                                                                                                                                                                                                                                  |                     |
|---------------------------|-------|------------|-----|----------------------------------------------------------------------------------------------------------------------------------------------------------------------------------------------------------------------------------------------------------------------------------|---------------------|
| L384F                     | COX-1 | 90         | 8   | Oxygenation: (DHLLA) ↓9.6-fold.                                                                                                                                                                                                                                                  | 9,28                |
| L384V                     | COX-1 | 23         | 23  | Oxygenation: (DHLLA) ↓5.4-fold. Products: (AA) %11-HETE ↓1.7-fold, %15-HETE ↓3.1-fold.                                                                                                                                                                                           | 9,28                |
| Y385F                     | COX-1 | 57         | 0   |                                                                                                                                                                                                                                                                                  | 9,32                |
| Y385F                     | COX-2 | 135 or 185 | 0   | Oxygenation: (2-AG) ↓100%. Aspirin acetylation: ↓93%.                                                                                                                                                                                                                            | 12,16, 23,25        |
| W387A                     | COX-1 | 60         | 0   |                                                                                                                                                                                                                                                                                  | 9                   |
| W387F                     | COX-1 | 57         | 44  | K <sub>MS</sub> : (AA) ↑12-fold. Oxygenation: (EPA) ↓2.1-fold; (LA) ↓2-fold; (DHLLA) ↓2.1-fold. Products: (AA) %11-HETE ↑14-fold, %15-HETE ↓2.5-fold.                                                                                                                            | 9,27, 28            |
| W387L                     | COX-1 | 123        | 7   | K <sub>MS</sub> : (AA) ↑4-fold. Oxygenation: (EPA) ↓71-fold; (LA) ↓12-fold; (DHLLA) ↓22-fold. Products: (AA) %11-HETE ↑16-fold, %15-HETE NC.                                                                                                                                     | 9,27, 28            |
| W387R                     | COX-1 | 0          | 0   |                                                                                                                                                                                                                                                                                  | 9                   |
| W387S                     | COX-1 | 4          | 0   |                                                                                                                                                                                                                                                                                  | 9                   |
| W387F                     | COX-2 | NR         | 15  | Products: (AA) PGH <sub>2</sub> ↓19-fold, 11-HETE NC; (2-AG) %HETE-Gs ↑. Potencies: Naproxen ↓; Diclofenac NC; Flurbiprofen NC; Indomethacin NC.                                                                                                                                 | 11,22, 43           |
| Y404F                     | COX-2 | 79         | 81  | K <sub>MS</sub> : (AA) ↑1.7-fold. No effect on tyrosyl radical migration.                                                                                                                                                                                                        | 25                  |
| Y417F                     | COX-1 | 79         | 86  |                                                                                                                                                                                                                                                                                  | 32                  |
| V434I                     | COX-2 | NR         | NR  | Potencies: Meloxicam ↓9.3-fold. Reduced ability to make HETEs after acetylation.                                                                                                                                                                                                 | 30,44               |
| V434I/<br>R513H/<br>V523I | COX-2 | 109 or 118 | 104 | Oxygenation: (2-AG) ↓75%; (AEA) ↓62%. Products: (2-AG) %HETE-Gs ↑. Potencies: Indomethacin ↓10-fold; Meclofenamic acid ↓2.3-fold; Meloxicam ↓8.1-fold; Indomethacin esters/amides ↓; Meclofenamic acid amide NC. Unable to make HETEs after acetylation. Aspirin acetylation NC. | 12,13, 21,22, 30,44 |
| L472M                     | COX-2 | NR         | 106 | K <sub>MS</sub> : (AA) ↓1.6-fold. k <sub>catS</sub> : (AA) NC. Potencies: Indomethacin ↓1.6-fold; Naproxen NC; Flurbiprofen NC; Diclofenac NC; Celecoxib ↓1.8-fold; Indomethacin amides/esters ↓3- to 11-fold.                                                                   | 45                  |
| E502G                     | COX-2 | 90         | 70  | K <sub>MS</sub> : (AA) NC; (EPA) NC. No effect on activation or inactivation.                                                                                                                                                                                                    | 31                  |
| L503F                     | COX-2 | NR         | NR  | Potencies: Indomethacin ↓2.5-fold; Lumiracoxib (AA) NC, (2-AG) ↓; Indomethacin esters/amides I; Meclofenamic acid NC; Meclofenamic amide NC.                                                                                                                                     | 13,46               |
| Y504F                     | COX-2 | 240        | 67  | K <sub>MS</sub> : (AA) ↑2-fold. Blocks tyrosyl radical migration.                                                                                                                                                                                                                | 25,34               |

|             |       |     |     |                                                                                                                                                                                                                                                     |                  |
|-------------|-------|-----|-----|-----------------------------------------------------------------------------------------------------------------------------------------------------------------------------------------------------------------------------------------------------|------------------|
| C512S       | COX-1 | 92  | 96  | K <sub>MS</sub> : (AA) NC. Potencies: Flurbiprofen NC. No effect on dimer formation, glycosylation, or inactivation by maleimides.                                                                                                                  | 33               |
| H513R       | COX-1 | NR  | 136 | K <sub>MS</sub> : (AA) NC. Potencies: Sulindac sulfide ↓1.8-fold; Indomethacin ↑1.9-fold; Diclofenac NC; DuP697 NC; NS-398 ↑2-fold; SC-58125 NC; DFU NC; L-745,296 ↓5-fold.                                                                         | 47               |
| H513F/I523V | COX-1 | NR  | 200 | K <sub>MS</sub> : (AA) NC. Potencies: Sulindac sulfide NC; indomethacin ↑2.4-fold; Diclofenac ↑1.9-fold; DuP697 ↑280-fold; NS-398 ↑34-fold; SC-58125 ↑>30-fold; DFU ↑>27-fold; L-745,296 ↓13-fold.                                                  | 47               |
| R513H       | COX-2 | 92  | 100 | K <sub>MS</sub> : (AA) ↑2.2-fold or NC; (2-AG) NC; (1-AG) NC; k <sub>cat</sub> : (AA) NC; (2-AG) NC; (1-AG) NC. Oxygenation: (2-AG) ↓56% or NC; (AEA) ↓57%. Increased rate of aspirin acetylation. Reduced ability to make HETES after acetylation. | 21,22, 30,48, 49 |
| R513H/V523I | COX-2 | NR  | NR  | Oxygenation: (2-AG) ↓62%; (AEA) ↓57%.                                                                                                                                                                                                               | 21,22            |
| F518A       | COX-1 | 23  | 38  | K <sub>MS</sub> : (AA) ↑10-fold. Products: %11-HETE ↑3.5-fold, %15-HETE NC.                                                                                                                                                                         | 9                |
| F518L       | COX-1 | 130 | 99  | K <sub>MS</sub> : (AA) ↑2.4-fold. Products: (AA) %11-HETE ↑1.7-fold, %15-HETE NC.                                                                                                                                                                   | 9                |
| F518M       | COX-1 | 55  | 70  | Products: (AA) %11-HETE ↑2-fold, %15-HETE ↑1.8-fold.                                                                                                                                                                                                | 9                |
| F518Y       | COX-1 | 30  | 44  | Oxygenation: (DHLA) ↓8.1-fold. K <sub>MS</sub> : (AA) ↑2-fold. Products: (AA) %11-HETE ↑1.7-fold, 15-HETE ↑2.7-fold (50% S).                                                                                                                        | 9,33             |
| M522A       | COX-1 | 48  | 65  | K <sub>MS</sub> : (AA) NC. Oxygenation: (DHLA) ↓1.6-fold. Products: (AA) %11-HETE ↑1.5-fold, %15-HETE NC.                                                                                                                                           | 9,28             |
| M522I       | COX-1 | 105 | 69  | Products: (AA) %11-HETE NC, %15-HETE NC.                                                                                                                                                                                                            | 9                |
| M522L       | COX-1 | 28  | 46  | K <sub>MS</sub> : (AA) ↑1.7-fold. Products: (AA) %11-HETE NC, %15-HETE ↓100%.                                                                                                                                                                       | 9                |
| I523A       | COX-1 | 112 | 64  | Oxygenation: (EPA) ↓2-fold; (LA) ↓14-fold; (DHLA) NC. Products: (AA) %11-HETE ↑4.8-fold, %15-HETE NC.                                                                                                                                               | 9,27, 28         |
| I523V       | COX-1 | 57  | 70  | Oxygenation: (LA) ↓3.7-fold. Products: (AA) %11-HETE NC, %15-HETE NC.                                                                                                                                                                               | 9,27             |
| I523V       | COX-1 | NR  | 58  | K <sub>MS</sub> : (AA) NC. Potencies: Sulindac sulfide ↑13-fold; Indomethacin ↑5-fold; Diclofenac ↑1.9-fold; DuP697 ↑370-fold; NS-398 ↑4.3-fold; SC-58125 ↑>15-fold; DFU ↑>2.4-fold; L-745,296 ↑4.6-fold.                                           | 47               |
| V523A       | COX-2 | NR  | 75  | K <sub>MS</sub> : (AA) NC. Potencies: NS-398 ↓1.5-fold; DuP697 ↑5-fold; SC-58125 ↑60-fold; Nimesulide ↓>25-fold.                                                                                                                                    | 50               |

|       |       |          |                          |                                                                                                                                                                                                                                                                                                                                                                                                                                                                                                                                       |                                 |
|-------|-------|----------|--------------------------|---------------------------------------------------------------------------------------------------------------------------------------------------------------------------------------------------------------------------------------------------------------------------------------------------------------------------------------------------------------------------------------------------------------------------------------------------------------------------------------------------------------------------------------|---------------------------------|
| V523E | COX-2 | NR       | 211                      | K <sub>MS</sub> : (AA) ↓1.8-fold. Potencies: NS-398 ↓>20-fold; DuP697 ↓>30-fold; SC-58125 ↓>7-fold; Nimesulide ↓>25-fold.                                                                                                                                                                                                                                                                                                                                                                                                             | 50                              |
| V523I | COX-2 | NR       | 85 or ~100 or 110 or 185 | K <sub>MS</sub> : (AA) NC. Oxygenation: (2-AG) NC; (AEA) NC; (DHLLA) ↓1.9-fold. Potencies: Indomethacin NC or ↓2-fold; Mefenamic acid ↑3-fold; Diclofenac ↓4-fold; Flurbiprofen NC; Naproxen ↓>11-fold; DuP697 ↓10-fold; NS-398 ↓>2,000-fold; Nimesulide ↓>25-fold; SC-58125 ↓>2,500-fold; SC-236 ↓3,000-fold; Meloxicam NC; Indomethacin esters/amides ↓; Indomethacin-dansyl conjugate 1 NC; Indomethacin-dansyl conjugate 2 NC; Indomethacin-podophyllotoxin conjugate ↓3.8-fold. Reduced ability to make HETEs after acetylation. | 5-6,13, 21,22, 24,28, 30,44, 50 |
| V523K | COX-2 | NR       | 45                       | K <sub>MS</sub> : (AA) ↑2-fold. Potencies NS-398 ↓>20-fold; DuP697 ↓4-fold; SC-58125 ↓>7-fold; Nimesulide ↓>25-fold.                                                                                                                                                                                                                                                                                                                                                                                                                  | 50                              |
| E524D | COX-1 | 85       | 80                       | K <sub>MS</sub> : (AA) NC.                                                                                                                                                                                                                                                                                                                                                                                                                                                                                                            | 8                               |
| E524K | COX-1 | 75       | 85                       | K <sub>MS</sub> : (AA) NC.                                                                                                                                                                                                                                                                                                                                                                                                                                                                                                            | 8                               |
| E524Q | COX-1 | 105      | 110                      | K <sub>MS</sub> : (AA) ↑1.8-fold;                                                                                                                                                                                                                                                                                                                                                                                                                                                                                                     | 8                               |
| E524L | COX-2 | NR       | 41                       | Oxygenation: (2-AG) ↓82%; (AEA) ↓46%. Products: (2-AG) %HETE-Gs ↑. Potencies: Indomethacin NC; Meclofenamic acid ↓3-fold; Meclofenamic acid amide ↓2.2-fold; Indomethacin esters/amides I. Binding of a fluorescent indomethacin amide: ↓100%.                                                                                                                                                                                                                                                                                        | 13,17, 21,22                    |
| V525A | COX-2 | 129      | 150                      | K <sub>MS</sub> : (AA) NC; (EPA) NC. No effect on activation or inactivation. Residual activities: nimesulide ↑1.6-fold; NS-398 ↑1.7-fold.                                                                                                                                                                                                                                                                                                                                                                                            | 31                              |
| A527V | COX-2 | NR       | NR                       | Products: (AA) 15(R)-PGH <sub>2</sub> :15(S)-PGH <sub>2</sub> NC, 15(R)-HETE:15(S)-HETE ↑, 11(R)-HETE:11(S)-HETE NC.                                                                                                                                                                                                                                                                                                                                                                                                                  | 36                              |
| F529E | COX-1 | 0        | 4                        | K <sub>MS</sub> : (AA) NC.                                                                                                                                                                                                                                                                                                                                                                                                                                                                                                            | 51                              |
| F529K | COX-1 | 0        | 3                        |                                                                                                                                                                                                                                                                                                                                                                                                                                                                                                                                       | 51                              |
| F529L | COX-1 | 0        | 0                        |                                                                                                                                                                                                                                                                                                                                                                                                                                                                                                                                       | 51                              |
| F529Y | COX-1 | 0        | 0                        |                                                                                                                                                                                                                                                                                                                                                                                                                                                                                                                                       | 51                              |
| S530A | COX-1 | 68 or 75 | 58 or 64                 | K <sub>MS</sub> : (AA) NC; (EPA) ↑24-fold; (LA) ↑2.5-fold; (DHLLA) ↑2.6-fold. Oxygenation: (EPA) NC; (LA) ↓1.8-fold; (DHLLA) NC. Products: (AA) %11-HETE NC, %15-HETE NC. Potencies: Flurbiprofen NC; Flufenamic acid NC; <i>O</i> -Acetylsalicylhydroxamic acid I; Aspirin I.                                                                                                                                                                                                                                                        | 9,10, 27,51, 52                 |
| S530C | COX-1 | 46       | 0.5                      |                                                                                                                                                                                                                                                                                                                                                                                                                                                                                                                                       | 51                              |

|             |       |     |              |                                                                                                                                                                                                                                                                                                                                                                                                                                                                                                                                                                                             |                              |
|-------------|-------|-----|--------------|---------------------------------------------------------------------------------------------------------------------------------------------------------------------------------------------------------------------------------------------------------------------------------------------------------------------------------------------------------------------------------------------------------------------------------------------------------------------------------------------------------------------------------------------------------------------------------------------|------------------------------|
| S530G       | COX-1 | 118 | 3            |                                                                                                                                                                                                                                                                                                                                                                                                                                                                                                                                                                                             | 51                           |
| S530I       | COX-1 | NR  | 0            |                                                                                                                                                                                                                                                                                                                                                                                                                                                                                                                                                                                             | 36                           |
| S530L       | COX-1 | 161 | 0            |                                                                                                                                                                                                                                                                                                                                                                                                                                                                                                                                                                                             | 36,51                        |
| S530M       | COX-1 | NR  | 0            |                                                                                                                                                                                                                                                                                                                                                                                                                                                                                                                                                                                             | 36                           |
| S530N       | COX-1 | 96  | 0            |                                                                                                                                                                                                                                                                                                                                                                                                                                                                                                                                                                                             | 51                           |
| S530T       | COX-1 | 30  | 0 or 6 or 17 | $K_{MS}$ : (AA) $\uparrow$ 6.5-fold or 9-fold; (EPA) $\uparrow$ 58-fold; (LA) $\uparrow$ 48-fold; (DHLA) $\uparrow$ 30-fold. Oxygenation: (EPA) $\downarrow$ 50-fold; (LA) $\downarrow$ 6.3-fold; (DHLA) $\downarrow$ 24-fold. Products: (AA) %11-HETE $\downarrow$ 100%, %15-HETE $\uparrow$ 4-fold. Human enzyme I, Ovine enzyme active. Potencies: Aspirin I.                                                                                                                                                                                                                            | 27,36, 51                    |
| S530V       | COX-1 | 94  | 0            |                                                                                                                                                                                                                                                                                                                                                                                                                                                                                                                                                                                             | 9,36                         |
| S530A       | COX-2 | 92  | 49           | Oxygenation: (2-AG) $\downarrow$ but stimulated by 13-Me-AA. Products: (2-AG) %HETE-Gs $\uparrow$ . Potencies: Diclofenac $\downarrow$ >650-fold; Piroxicam $\downarrow$ >109-fold; Lumiracoxib I; Ketorolac $\downarrow$ 23-fold; Indomethacin NC; Meclofenamic acid NC; Indomethacin esters/amides NC or $\downarrow$ ; Meclofenamic acid amide $\uparrow$ 3-fold; Indomethacin-dansyl conjugate 1 $\downarrow$ 3.3-fold; Indomethacin-dansyl conjugate 2 NC; Indomethacin-podophyllotoxin conjugate $\downarrow$ 5-fold. Aspirin acetylation $\downarrow$ 100%; ARN-2508 NC.             | 5,12-14,16, 22,24, 36,38, 41 |
| S530M       | COX-2 | 96  | NR           | $K_{MS}$ : (AA) $\uparrow$ 2.8-fold. Products: (AA) 15(R)-PGH <sub>2</sub> :15(S)-PGH <sub>2</sub> $\uparrow$ , 15(R)-HETE:15(S)-HETE $\downarrow$ , 11(R)-HETE:11(S)-HETE NC; (2-AG) %15-HETE-G $\uparrow$ ; (AEA) %15-HETE-EA $\uparrow$ . Potencies: L-745,337 $\downarrow$ 4.5-fold; SC-57666 $\downarrow$ 6-fold; NS-398 $\downarrow$ 7.5-fold; DuP697 NC; Flurbiprofen $\downarrow$ 20-fold; Ketoprofen $\downarrow$ 17-fold; Sulindac sulfide $\downarrow$ 19-fold; Indomethacin $\uparrow$ 1.9-fold; Meclofenamic acid $\downarrow$ >4800-fold; Diclofenac $\downarrow$ >3400-fold. | 21,22, 36,53                 |
| S530T       | COX-2 | NR  | 24           | Products: (AA) 15(R)-PGH <sub>2</sub> :15(S)-PGH <sub>2</sub> $\uparrow$ , 15(R)-HETE:15(S)-HETE NC, 11(R)-HETE:11(S)-HETE NC. Potencies: ARN-2508 $\downarrow$ 7.5-fold                                                                                                                                                                                                                                                                                                                                                                                                                    | 36,41, 54                    |
| S530V       | COX-2 | NR  | NR           | Products: (AA) 15(R)-PGH <sub>2</sub> :15(S)-PGH <sub>2</sub> $\uparrow$ , 15(R)-HETE:15(S)-HETE $\uparrow$ , 11(R)-HETE:11(S)-HETE NC.                                                                                                                                                                                                                                                                                                                                                                                                                                                     | 36                           |
| S530T/G533V | CPX-2 | NR  | 0            |                                                                                                                                                                                                                                                                                                                                                                                                                                                                                                                                                                                             | 54                           |
| L531A       | COX-1 | 100 | 4.6          | $K_{MS}$ : (AA) $\uparrow$ 27-fold. Oxygenation: (DHLA) $\downarrow$ 12-fold. Products: (AA) %11-HETE NC, %15-HETE NC.                                                                                                                                                                                                                                                                                                                                                                                                                                                                      | 9,28                         |

|             |       |            |           |                                                                                                                                                                                                                                                                                                |                     |
|-------------|-------|------------|-----------|------------------------------------------------------------------------------------------------------------------------------------------------------------------------------------------------------------------------------------------------------------------------------------------------|---------------------|
| L531D       | COX-1 | 26         | 13        | K <sub>MS</sub> : (AA) NC or ↓2.5-fold. Products: (AA) %11-HETE NC, %15-HETE NC. Potencies: Aspirin NC.                                                                                                                                                                                        | 9,51                |
| L531I       | COX-1 | 74         | 19        | K <sub>MS</sub> : (AA) ↓5-fold or 12-fold. Potencies: Aspirin NC.                                                                                                                                                                                                                              | 9,51                |
| L531K       | COX-1 | 0          | 0         |                                                                                                                                                                                                                                                                                                | 9,51                |
| L531N       | COX-1 | 9          | 7         | K <sub>MS</sub> : (AA) ↑1.5-fold or ↓1.7-fold. Products: (AA) %11-HETE NC, %15-HETE NC. Potencies: Aspirin NC.                                                                                                                                                                                 | 9,51                |
| L531V       | COX-1 | 75         | 8         | K <sub>MS</sub> : (AA) NC; (DHLLA) ↑2.5-fold. Oxygenation: (DHLLA) ↓5.1-fold. Products: (AA) %11-HETE NC, %15-HETE NC.                                                                                                                                                                         | 9,28                |
| L531A       | COX-2 | ~100 or 89 | 58 or 1.5 | K <sub>MS</sub> : (AA) NC; (2-AG) ↓1.9-fold. k <sub>catS</sub> : (AA) ↓1.9-fold; (2-AG) ↓1.6-fold. Oxygenation: (2-AG) ↓1.6-fold and not stimulated by 13-Me-AA; (AEA) ↓ but <AA. Products: (2-AG) %HETE-Gs ↑.                                                                                 | 14,21, 22,40, 48,49 |
| L531F       | COX-2 | ~100 or 82 | 89        | K <sub>MS</sub> : (AA) ↑2.9-fold or NC; (2-AG) NC; (1-AG) NC. k <sub>catS</sub> : (AA) NC or ↓1.5-fold; (2-AG) NC; (1-AG) NC. Oxygenation: (2-AG) NC. Potencies: Aspirin I; celecoxib ↓9-fold. Eliminates inverted binding conformation of AA, but binding in one subunit is still suboptimal. | 40,48, 49           |
| L531I       | COX-2 | NR         | NR        | Oxygenation: (AA) ↓; (2-AG) ↓ but stimulated by 13-Me-AA; AEA ↓. Products: (AA) 15(R)-PGH <sub>2</sub> :15(S)-PGH <sub>2</sub> ↑.                                                                                                                                                              | 14,21, 22,36        |
| L531N       | COX-2 | 106        | 38        | K <sub>MS</sub> : (AA) ↑2.3-fold. k <sub>catS</sub> : (AA) ↓2.6-fold. Potencies: Aspirin ↓; celecoxib ↓3.4-fold.                                                                                                                                                                               | 49                  |
| L531P       | COX-2 | ~100       | 64        | K <sub>MS</sub> : (AA) ↓1.8-fold; (2-AG) NC. k <sub>catS</sub> : (AA) ↓1.8-fold; (2-AG) ↓1.4-fold. Oxygenation: (2-AG) ↓1.5-fold.                                                                                                                                                              | 39,48               |
| L531 T      | COX-2 | ~100       | 56        | Oxygenation: (2-AG) ↓1.8-fold.                                                                                                                                                                                                                                                                 | 48                  |
| L531V       | COX-2 | NR         | NR        | Oxygenation: (AA) ↓; (2-AG) ↓ but <AA and not stimulated by 13-Me-AA; (AEA) ↓ but <AA. Products: (2-AG) HETE-Gs ↑.                                                                                                                                                                             | 14,21, 22           |
| L531W       | COX-2 | 37         | 22        |                                                                                                                                                                                                                                                                                                | 49                  |
| K532E       | COX-1 | 0          | 0         |                                                                                                                                                                                                                                                                                                | 51                  |
| K532L       | COX-1 | 1          | 15        | K <sub>MS</sub> : (AA) NC. Potencies: Aspirin I.                                                                                                                                                                                                                                               | 51                  |
| K532R       | COX-1 | 55         | 55        | K <sub>MS</sub> : (AA) NC. Potencies: Aspirin NC.                                                                                                                                                                                                                                              | 51                  |
| G533A       | COX-1 | 54 or 85   | 0         |                                                                                                                                                                                                                                                                                                | 9,51                |
| G533A/I523V | COX-1 | 54         | 0         |                                                                                                                                                                                                                                                                                                | 9                   |
| G533A       | COX-2 | 99 or 104  | 8         | K <sub>MS</sub> : (αLA) NC; (SA) NC; (EPA) NC; k <sub>catS</sub> : (αLA) NC; (SA) NC; (EPA) ↓2.1-fold. Oxygenation: (LA) ↓3.2-fold or 100%;(αLA) NC; (SA) NC; (EPA) ↓2.2-fold. Unable to make HETEs after acetylation.                                                                         | 18,30, 55           |

|             |       |          |            |                                                                                                                                                                                                                                     |              |
|-------------|-------|----------|------------|-------------------------------------------------------------------------------------------------------------------------------------------------------------------------------------------------------------------------------------|--------------|
| G533L       | COX-2 | 107      | 0          | Oxygenation: (LA) ↓100%; (αLA) ↓5-fold or 100%; (SA) ↓5.5-fold. Activity with αLA and SA increased with added H <sub>2</sub> O <sub>2</sub> . Unable to make HETEs after acetylation. Potencies: ARN-2508 ↓.                        | 18,30, 41,55 |
| G533V       | COX-2 | 93 or 97 | 0          | Oxygenation: (LA) 100%; (αLA) ↓1.7-fold or 6-fold or >95%; (SA) ↓2.4-fold or >95%; (EPA) ↓>95%; (2-AG) ↓100%. Activity with αLA and SA increased with added H <sub>2</sub> O <sub>2</sub> . Unable to make HETEs after acetylation. | 18,23, 30,55 |
| L534A       | COX-1 | 72       | 59         | K <sub>MS</sub> : (AA) ↑4-fold. Oxygenation: (EPA) ↓2-fold; (LA) ↓2.4-fold; (DHLLA) ↓1.9-fold. Products: (AA) %11-HETE NC, %15-HETE ↑22-fold (95% S).                                                                               | 9,27, 28     |
| L534V       | COX-1 | 102      | 98         | Oxygenation: (EPA) ↓10-fold; (LA) ↓100%; (DHLLA) ↓2.4-fold. Products: (AA) %11-HETE ↑3.2-fold, %15-HETE ↑19-fold (96% S).                                                                                                           | 9,27, 28     |
| C540S       | COX-1 | 44       | 11         | K <sub>MS</sub> : (AA) ↓7-fold. Potencies: Flurbiprofen NC. No effect on dimer formation, glycosylation, or inactivation by maleimides.                                                                                             | 33           |
| S541C/ΔC    | COX-2 | NR       | 100 or 110 | Dimer not cross-linked upon oxidation                                                                                                                                                                                               | 1,2          |
| A543C/ΔC    | COX-2 | NR       | 81 or 88   | Dimer not cross-linked upon oxidation                                                                                                                                                                                               | 1,2          |
| A543E       | COX-2 | NR       | 110        |                                                                                                                                                                                                                                     | 1            |
| A543E/H122N | COX-2 | NR       | 120        |                                                                                                                                                                                                                                     | 1            |
| N594A       | COX-2 | NR       | NR         | Improves crystallization by elimination of glycosylation site.                                                                                                                                                                      | 40,48        |
| G601R       | COX-2 | 86       | 80         | K <sub>MS</sub> : (AA) NC; (EPA) NC. No effect on activation or inactivation.                                                                                                                                                       | 31           |

<sup>a</sup>Percent of wild-type peroxidase activity, if reported. NR – not reported.

<sup>b</sup>Percent of wild-type peroxidase activity, if reported. NR – not reported.

<sup>c</sup>AA – arachidonic acid; 2-AG – 2-arachidonoylglycerol; AEA – arachidonylethanolamide; LA – linoleic acid; (αLA) – α-linolenic acid; EPA – eicosapentaenoic acid; DHLLA – dihomo-γ-linolenic acid; SA – stearidonic acid; 13-Me-AA – 13(S)-methyl-arachidonic acid; GSH Px – glutathione peroxidase; NC – no change or difference from wild-type < 1.5-fold; ↑ – increased; ↓ – decreased; I – inactive. All changes are relative to behavior with wild-type enzyme.

## References

- (1) Dong, L.; Yuan, C.; Orlando, B. J.; Malkowski, M. G.; Smith, W. L. *J Biol Chem* **2016**, *291*, 25641.
- (2) Yuan, C.; Sidhu, R. S.; Kuklev, D. V.; Kado, Y.; Wada, M.; Song, I.; Smith, W. L. *J Biol Chem* **2009**, *284*, 10046.
- (3) MirAfzali, Z.; Leipprandt, J. R.; McCracken, J. L.; DeWitt, D. L. *J Biol Chem* **2006**, *281*, 28354.
- (4) Blobaum, A. L.; Xu, S.; Rowlinson, S. W.; Duggan, K. C.; Banerjee, S.; Kudalkar, S. N.; Birmingham, W. R.; Ghebreselasie, K.; Marnett, L. J. *J Biol Chem* **2015**, *290*, 12793.

- (5) Xu, S.; Uddin, M. J.; Banerjee, S.; Duggan, K.; Musee, J.; Kiefer, J. R.; Ghebreselasie, K.; Rouzer, C. A.; Marnett, L. J. *J Biol Chem* **2019**, *294*, 8690.
- (6) Gierse, J. K.; McDonald, J. J.; Hauser, S. D.; Rangwala, S. H.; Koboldt, C. M.; Seibert, K. *J Biol Chem* **1996**, *271*, 15810.
- (7) Mancini, J. A.; Riendeau, D.; Falguyret, J. P.; Vickers, P. J.; O'Neill, G. P. *J Biol Chem* **1995**, *270*, 29372.
- (8) Bhattacharyya, D. K.; Lecomte, M.; Rieke, C. J.; Garavito, M.; Smith, W. L. *J Biol Chem* **1996**, *271*, 2179.
- (9) Thuresson, E. D.; Lakkides, K. M.; Rieke, C. J.; Sun, Y.; Wingerd, B. A.; Micielli, R.; Mulichak, A. M.; Malkowski, M. G.; Garavito, R. M.; Smith, W. L. *J Biol Chem* **2001**, *276*, 10347.
- (10) Loll, P. J.; Sharkey, C. T.; O'Connor, S. J.; Dooley, C. M.; O'Brien, E.; Devocelle, M.; Nolan, K. B.; Selinsky, B. S.; Fitzgerald, D. J. *Mol Pharmacol* **2001**, *60*, 1407.
- (11) Duggan, K. C.; Walters, M. J.; Musee, J.; Harp, J. M.; Kiefer, J. R.; Oates, J. A.; Marnett, L. J. *J Biol Chem* **2010**, *285*, 34950.
- (12) Hochgesang, G. P., Jr.; Rowlinson, S. W.; Marnett, L. J. *J Am Chem Soc* **2000**, *122*.
- (13) Kalgutkar, A. S.; Crews, B. C.; Rowlinson, S. W.; Marnett, A. B.; Kozak, K. R.; Remmel, R. P.; Marnett, L. J. *Proc Natl Acad Sci U S A* **2000**, *97*, 925.
- (14) Kudalkar, S. N.; Nikas, S. P.; Kingsley, P. J.; Xu, S.; Galligan, J. J.; Rouzer, C. A.; Banerjee, S.; Ji, L.; Eno, M. R.; Makriyannis, A.; Marnett, L. J. *J Biol Chem* **2015**, *290*, 7897.
- (15) Orlando, B. J.; Lucido, M. J.; Malkowski, M. G. *J Struct Biol* **2015**, *189*, 62.
- (16) Rowlinson, S. W.; Kiefer, J. R.; Prusakiewicz, J. J.; Pawlitz, J. L.; Kozak, K. R.; Kalgutkar, A. S.; Stallings, W. C.; Kurumbail, R. G.; Marnett, L. J. *J Biol Chem* **2003**, *278*, 45763.
- (17) Timofeevski, S. L.; Prusakiewicz, J. J.; Rouzer, C. A.; Marnett, L. J. *Biochemistry* **2002**, *41*, 9654.
- (18) Vecchio, A. J.; Orlando, B. J.; Nandagiri, R.; Malkowski, M. G. *J Biol Chem* **2012**, *287*, 24619.
- (19) Greig, G. M.; Francis, D. A.; Falguyret, J. P.; Ouellet, M.; Percival, M. D.; Roy, P.; Bayly, C.; Mancini, J. A.; O'Neill, G. P. *Mol Pharmacol* **1997**, *52*, 829.
- (20) Rieke, C. J.; Mulichak, A. M.; Garavito, R. M.; Smith, W. L. *J Biol Chem* **1999**, *274*, 17109.
- (21) Kozak, K. R.; Prusakiewicz, J. J.; Rowlinson, S. W.; Prudhomme, D. R.; Marnett, L. J. *Biochemistry* **2003**, *42*, 9041.
- (22) Kozak, K. R.; Prusakiewicz, J. J.; Rowlinson, S. W.; Schneider, C.; Marnett, L. J. *J Biol Chem* **2001**, *276*, 30072.
- (23) Kozak, K. R.; Rowlinson, S. W.; Marnett, L. J. *J Biol Chem* **2000**, *275*, 33744.
- (24) Uddin, M. J.; Crews, B. C.; Xu, S.; Ghebreselasie, K.; Daniel, C. K.; Kingsley, P. J.; Banerjee, S.; Marnett, L. J. *ACS Chem Biol* **2016**, *11*, 3052.
- (25) Rogge, C. E.; Liu, W.; Wu, G.; Wang, L. H.; Kulmacz, R. J.; Tsai, A. L. *Biochemistry* **2004**, *43*, 1560.
- (26) Landino, L. M.; Crews, B. C.; Gierse, J. K.; Hauser, S. D.; Marnett, L. J. *J Biol Chem* **1997**, *272*, 21565.
- (27) Malkowski, M. G.; Thuresson, E. D.; Lakkides, K. M.; Rieke, C. J.; Micielli, R.; Smith, W. L.; Garavito, R. M. *J Biol Chem* **2001**, *276*, 37547.
- (28) Thuresson, E. D.; Malkowski, M. G.; Lakkides, K. M.; Rieke, C. J.; Mulichak, A. M.; Ginell, S. L.; Garavito, R. M.; Smith, W. L. *J Biol Chem* **2001**, *276*, 10358.
- (29) Chubb, A. J.; Fitzgerald, D. J.; Nolan, K. B.; Moman, E. *Biochemistry* **2006**, *45*, 811.
- (30) Rowlinson, S. W.; Crews, B. C.; Goodwin, D. C.; Schneider, C.; Gierse, J. K.; Marnett, L. J. *J Biol Chem* **2000**, *275*, 6586.
- (31) Liu, W.; Poole, E. M.; Ulrich, C. M.; Kulmacz, R. J. *Pharmacogenomics J* **2011**, *11*, 337.
- (32) Shimokawa, T.; Kulmacz, R. J.; DeWitt, D. L.; Smith, W. L. *J Biol Chem* **1990**, *265*, 20073.
- (33) Smith, C. J.; Marnett, L. J. *Arch Biochem Biophys* **1996**, *335*, 342.
- (34) Rogge, C. E.; Ho, B.; Liu, W.; Kulmacz, R. J.; Tsai, A. L. *Biochemistry* **2006**, *45*, 523.
- (35) Harman, C. A.; Rieke, C. J.; Garavito, R. M.; Smith, W. L. *J Biol Chem* **2004**, *279*, 42929.

- (36) Schneider, C.; Boeglin, W. E.; Prusakiewicz, J. J.; Rowlinson, S. W.; Marnett, L. J.; Samel, N.; Brash, A. R. *J Biol Chem* **2002**, *277*, 478.
- (37) Prusakiewicz, J. J.; Felts, A. S.; Mackenzie, B. S.; Marnett, L. J. *Biochemistry* **2004**, *43*, 15439.
- (38) Blobaum, A. L.; Marnett, L. J. *J Biol Chem* **2007**, *282*, 16379.
- (39) Swinney, D. C.; Mak, A. Y.; Barnett, J.; Ramesha, C. S. *J Biol Chem* **1997**, *272*, 12393.
- (40) Vecchio, A. J.; Malkowski, M. G. *J Biol Chem* **2011**, *286*, 20736.
- (41) Goodman, M. C.; Xu, S.; Rouzer, C. A.; Banerjee, S.; Ghebreselasie, K.; Migliore, M.; Piomelli, D.; Marnett, L. J. *J Biol Chem* **2018**.
- (42) Bambai, B.; Rogge, C. E.; Stec, B.; Kulmacz, R. J. *J Biol Chem* **2004**, *279*, 4084.
- (43) Kiefer, J. R.; Pawlitz, J. L.; Moreland, K. T.; Stegeman, R. A.; Hood, W. F.; Gierse, J. K.; Stevens, A. M.; Goodwin, D. C.; Rowlinson, S. W.; Marnett, L. J.; Stallings, W. C.; Kurumbail, R. G. *Nature* **2000**, *405*, 97.
- (44) Xu, S.; Hermanson, D. J.; Banerjee, S.; Ghebreselasie, K.; Clayton, G. M.; Garavito, R. M.; Marnett, L. J. *J Biol Chem* **2014**, *289*, 6799.
- (45) Konkle, M. E.; Blobaum, A. L.; Moth, C. W.; Prusakiewicz, J. J.; Xu, S.; Ghebreselasie, K.; Akingbade, D.; Jacobs, A. T.; Rouzer, C. A.; Lybrand, T. P.; Marnett, L. J. *Biochemistry* **2016**, *55*, 348.
- (46) Windsor, M. A.; Valk, P. L.; Xu, S.; Banerjee, S.; Marnett, L. J. *Bioorg Med Chem Lett* **2013**, *23*, 5860.
- (47) Wong, E.; Bayly, C.; Waterman, H. L.; Riendeau, D.; Mancini, J. A. *J Biol Chem* **1997**, *272*, 9280.
- (48) Vecchio, A. J.; Simmons, D. M.; Malkowski, M. G. *J Biol Chem* **2010**, *285*, 22152.
- (49) Dong, L.; Anderson, A. J.; Malkowski, M. G. *Biochemistry* **2019**, *58*, 3990.
- (50) Guo, Q.; Wang, L. H.; Ruan, K. H.; Kulmacz, R. J. *J Biol Chem* **1996**, *271*, 19134.
- (51) Shimokawa, T.; Smith, W. L. *J Biol Chem* **1992**, *267*, 12387.
- (52) DeWitt, D. L.; el-Harith, E. A.; Kraemer, S. A.; Andrews, M. J.; Yao, E. F.; Armstrong, R. L.; Smith, W. L. *J Biol Chem* **1990**, *265*, 5192.
- (53) Mancini, J. A.; Vickers, P. J.; O'Neill, G. P.; Boily, C.; Falgueyret, J. P.; Riendeau, D. *Mol Pharmacol* **1997**, *51*, 52.
- (54) Lucido, M. J.; Orlando, B. J.; Vecchio, A. J.; Malkowski, M. G. *Biochemistry* **2016**, *55*, 1226.
- (55) Rowlinson, S. W.; Crews, B. C.; Lanzo, C. A.; Marnett, L. J. *J Biol Chem* **1999**, *274*, 23305.



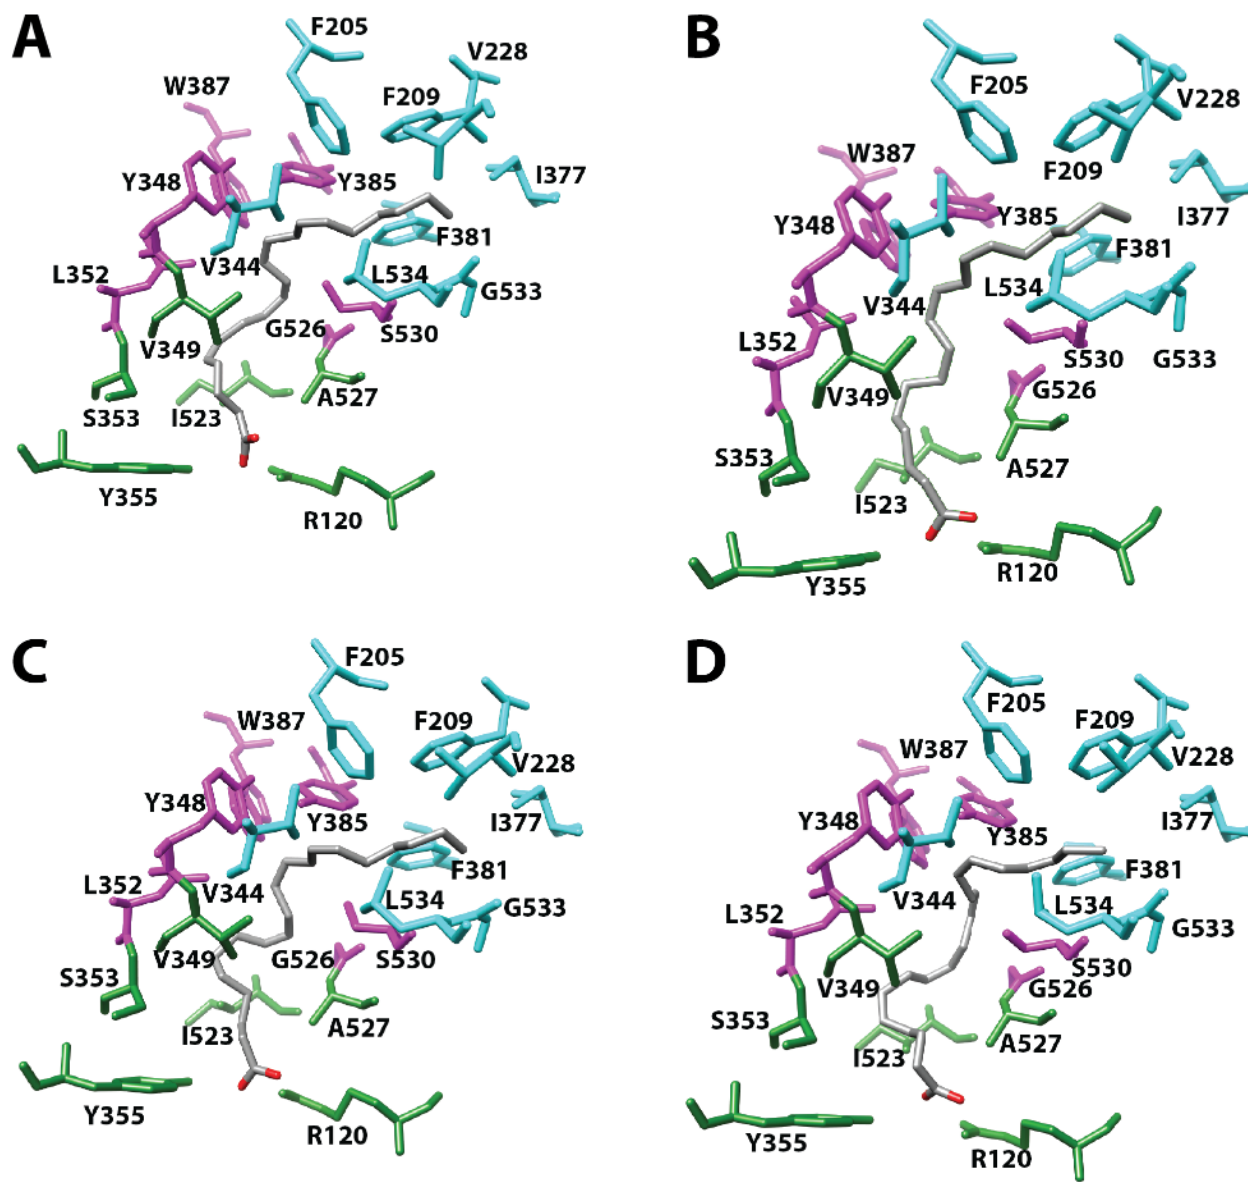

**Figure S1.** Structure of (A) AA, (B) LA, (C) DHLA, and (D) EPA, bound in the cyclooxygenase active site of COX-1 and the side chains that make up the proximal binding pocket (green), the central binding pocket (magenta), and the distal binding pocket (cyan). An overlay of these structures in stereoscopic view is provided in Figure 5B. From PDB #1DIY, #1IGZ, #1FE2, and #1IGX.



proximal binding pocket (green), the central binding pocket (magenta), and the distal binding pocket (cyan). An overlay of these structures is provided in Figure S3. From PDB #3HS5 (chain B), #4E1G, #3HS6 (chain B), #3HS7, and #3QH0.

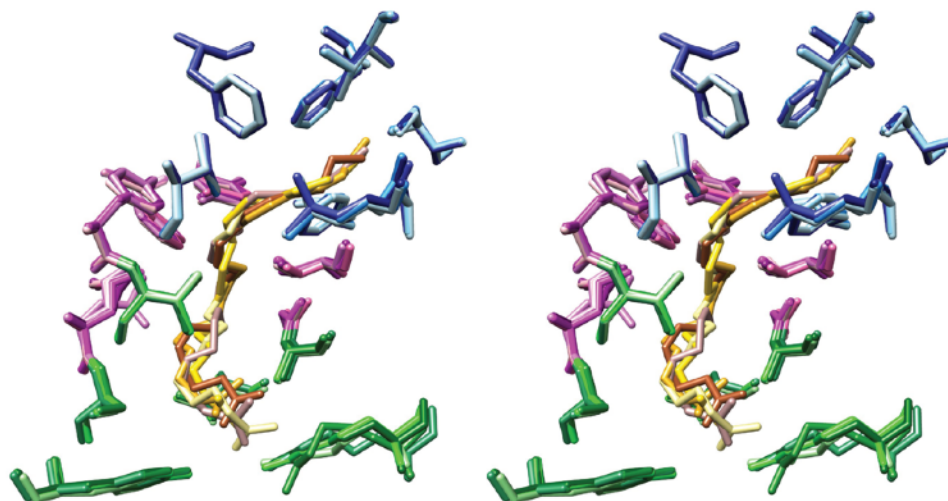

**Figure S3.** Wall-eyed stereo view of an overlay of the structures of five fatty acids in the cyclooxygenase active site of COX-2 and the side chains that make up the proximal binding pocket (green), the central binding pocket (magenta), and the distal binding pocket (blue). Fatty acids and amino acid side chains are colored from lightest to darkest in the order PA,  $\alpha$ LA, EPA, DHA, and AA. Notable is the minimal movement of active site residues to accommodate the structural differences among the various fatty acids. Monoscopic views of the individual structures are provided in Figure S2. From PDB #3HS5 (chain B), #4E1G, #3HS6 (chain B), #3HS7, and #3QH0 (chain A).

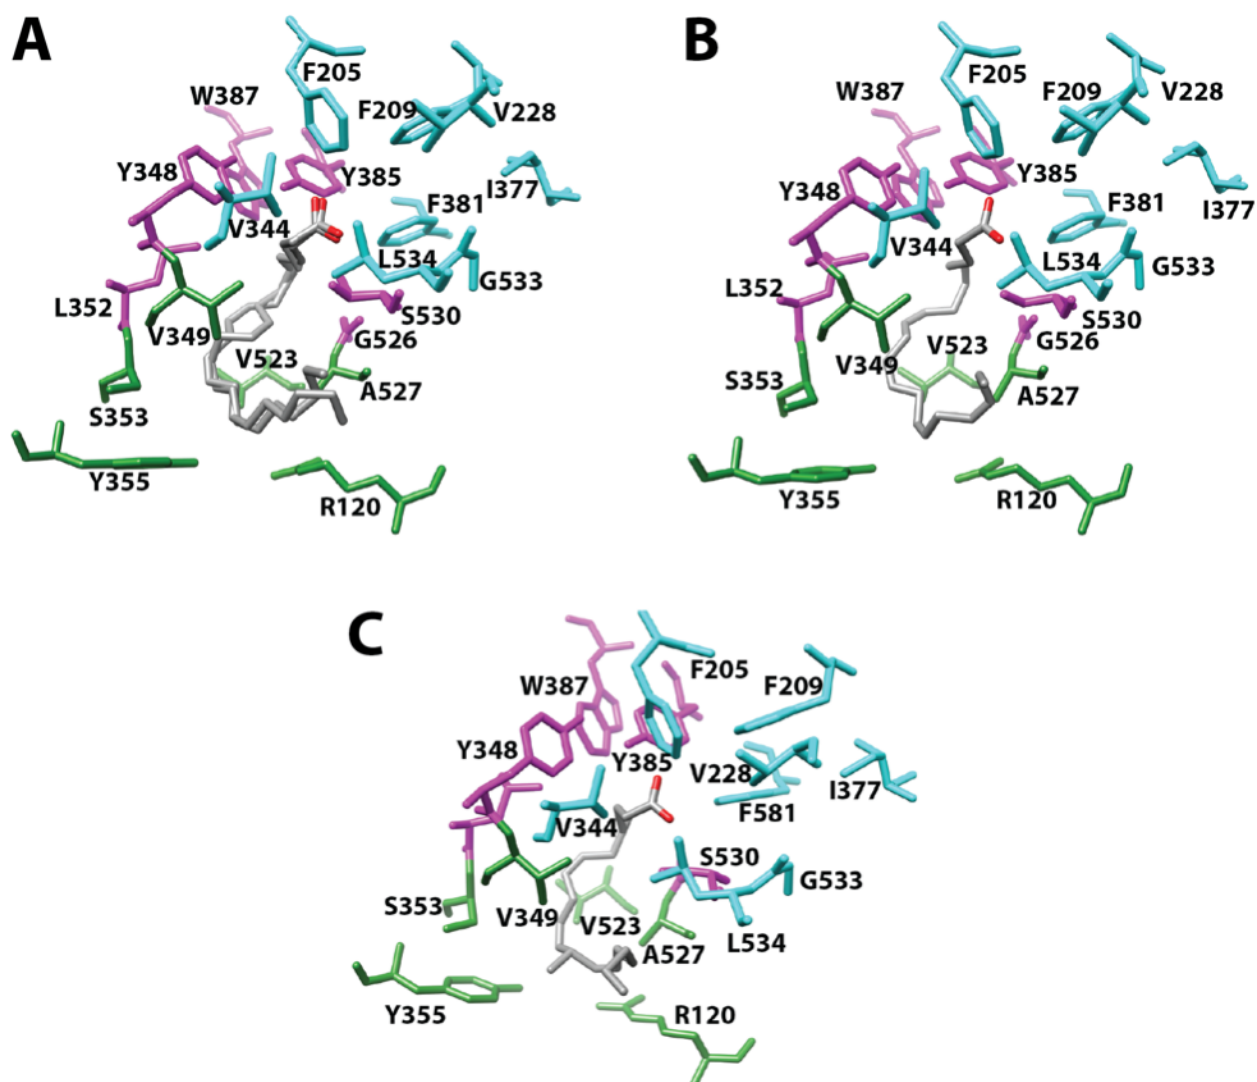

**Figure S4.** Structure of (A) AA (nonproductive conformation), (B) EPA (nonproductive conformation), and (C) 13-Me-AA bound in the cyclooxygenase active site of COX-2 and the side chains that make up the proximal binding pocket (green), the central binding pocket (magenta), and the distal binding pocket (cyan). Note that AA is observed in two slightly different conformations. From PDB #3HS5 (chain A), #3HS6 (chain A), and #4RUT.

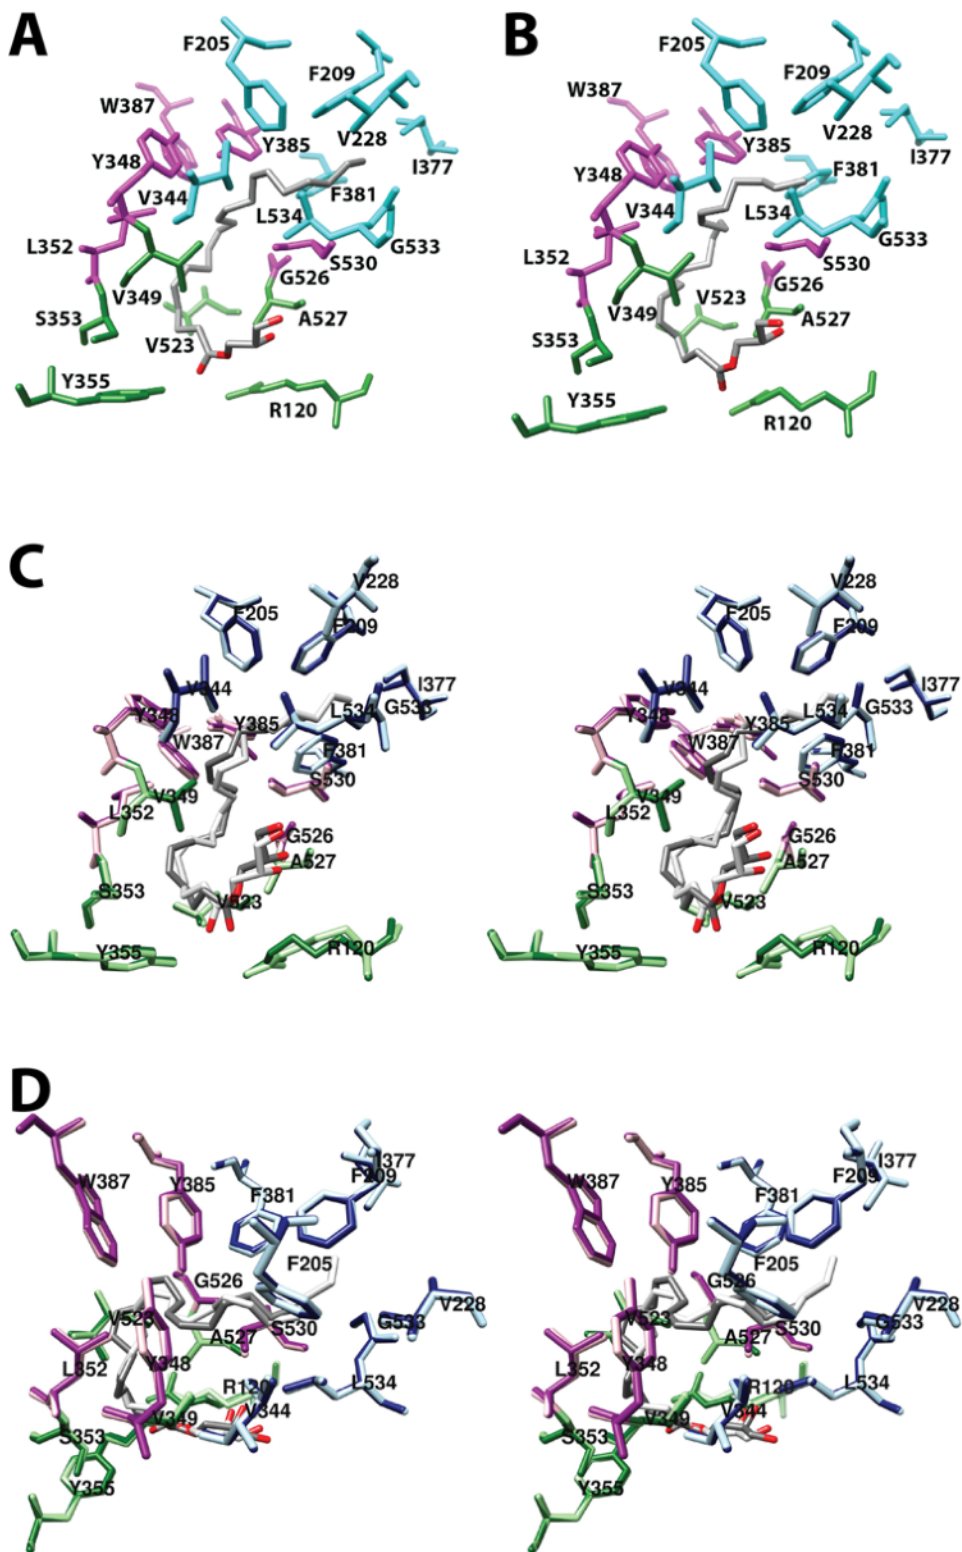

**Figure S5.** Structure of 1-AG in the (A) productive conformation and (B) nonproductive conformation bound in the active site of COX-2 and the side chains that make up the proximal binding pocket (green), the central binding pocket (magenta), and the distal binding pocket (cyan). (C) and (D) Two different wall-eyed stereo views of the overlay of the structures of the nonproductive (dark gray) and productive (light

gray) conformations of 1-AG bound in the cyclooxygenase active site. Residues in the surrounding binding pockets are colored similarly to those in (A) and (B) with the lighter and darker colors corresponding to the productive and nonproductive conformations, respectively. From PDB #3MDL.



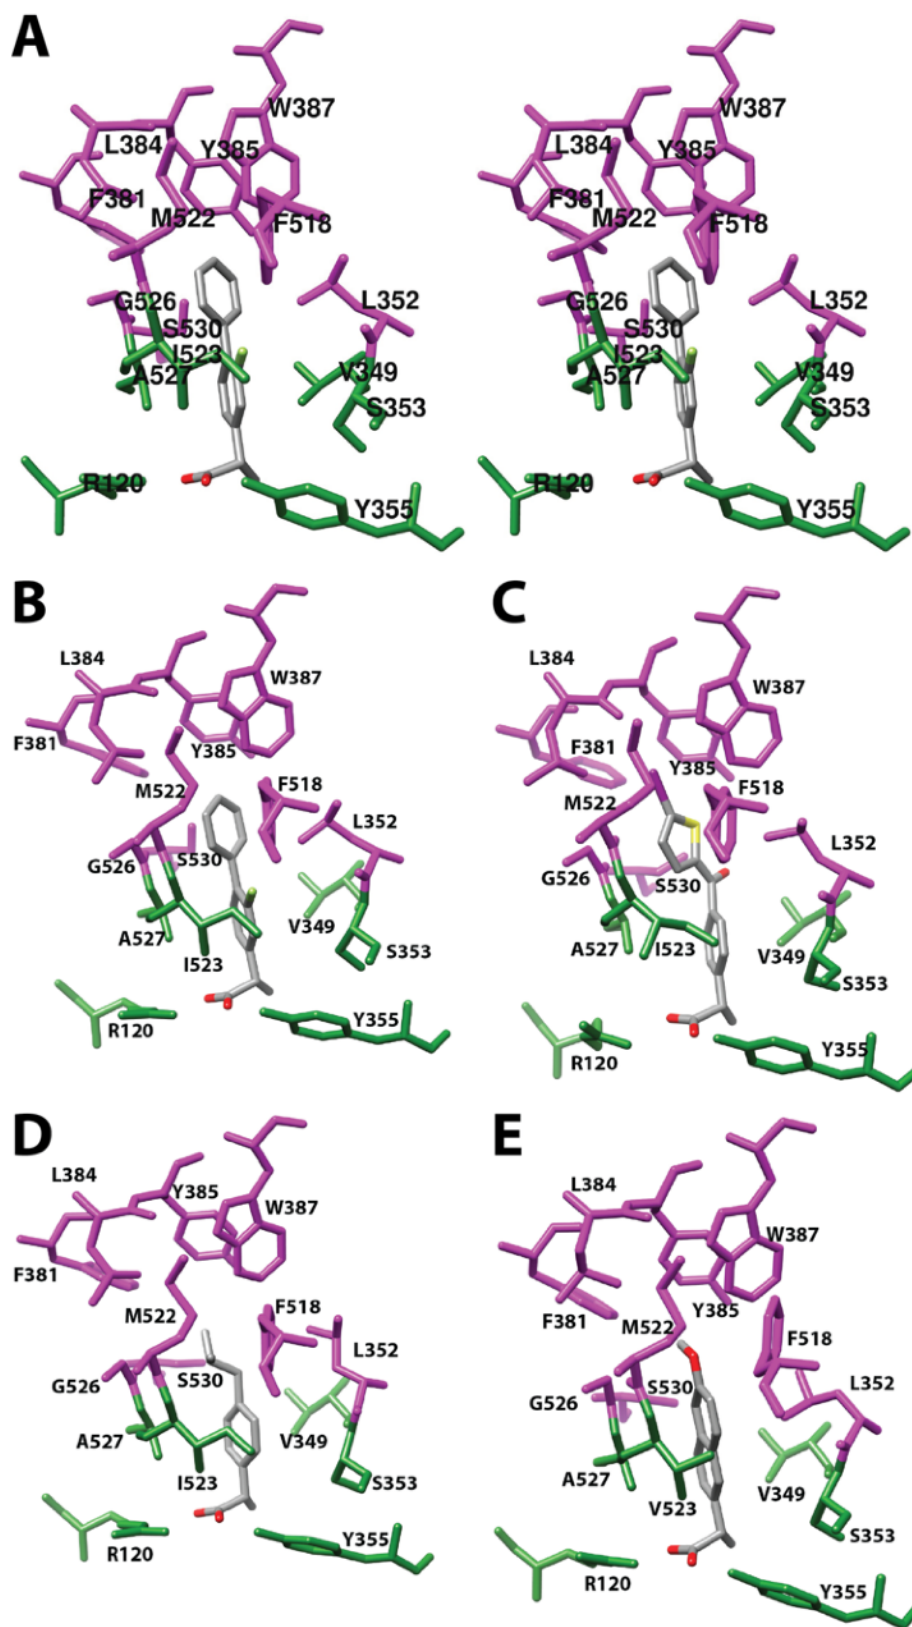

Figure S6. Wall-eyed stereo view of the structure of (S)-flurbiprofen bound in the cyclooxygenase active



site of COX-1. Structures of (B) (*S*)-flurbiprofen, (C) (*S*)-iodosuprofen, (D) (*S*)-ibuprofen, and (E) (*S*)-naproxen, bound in the cyclooxygenase active site of COX-1 (B, C, and D) or COX-2 (E). The side chains that make up the proximal binding pocket (green) and the central binding pocket (magenta) are shown. From PDB #1EQH (A and B), #1PGE, #1EQG, and #3NT1.

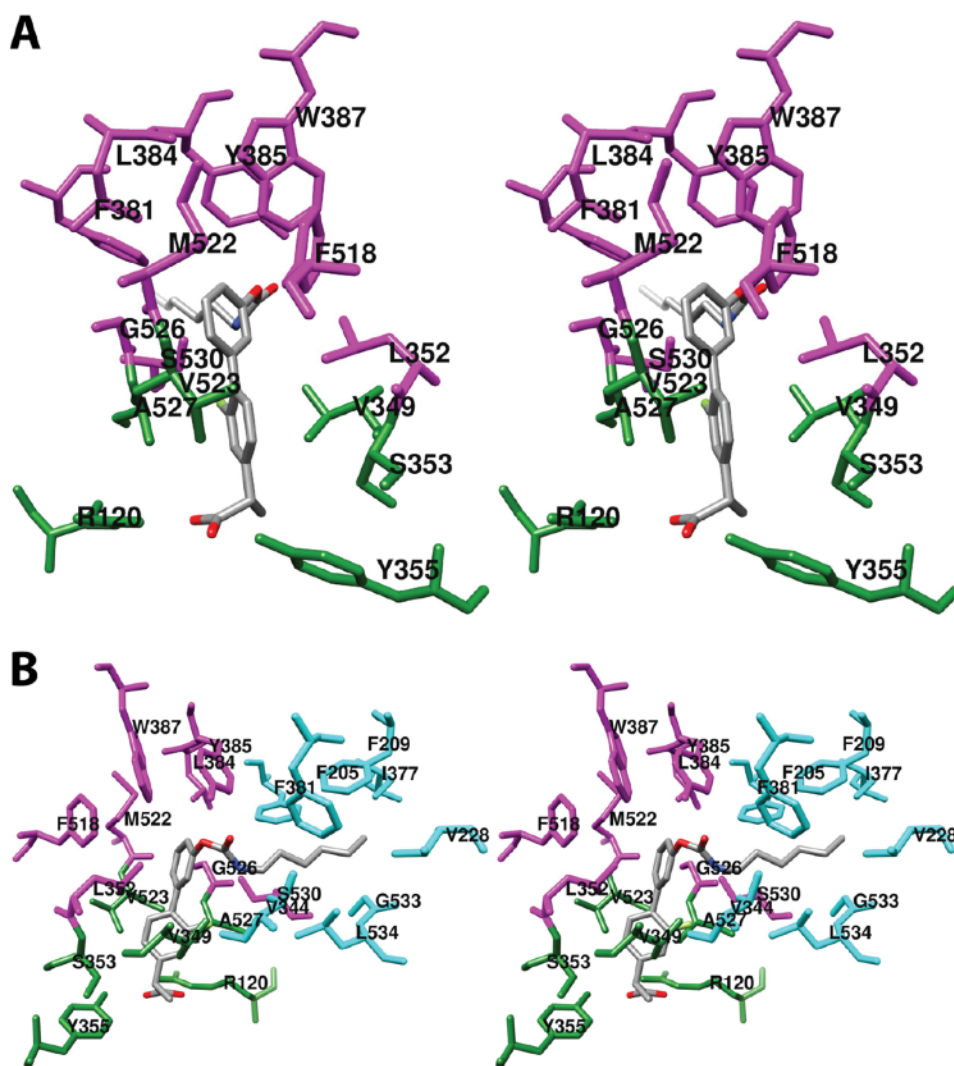

**Figure S7.** (A) Wall-eyed stereo view of the structure of ARN-2508 bound in the cyclooxygenase active site of COX-2 and the side chains that make up the proximal binding pocket (green) and the central binding pocket (magenta). (B) Same as (A) from a different perspective. Residues belonging to the distal AA binding pocket have been added and highlighted in cyan to reveal the localization of the hydrocarbon tail of ARN-2508 in this pocket. From PDB #5W58.

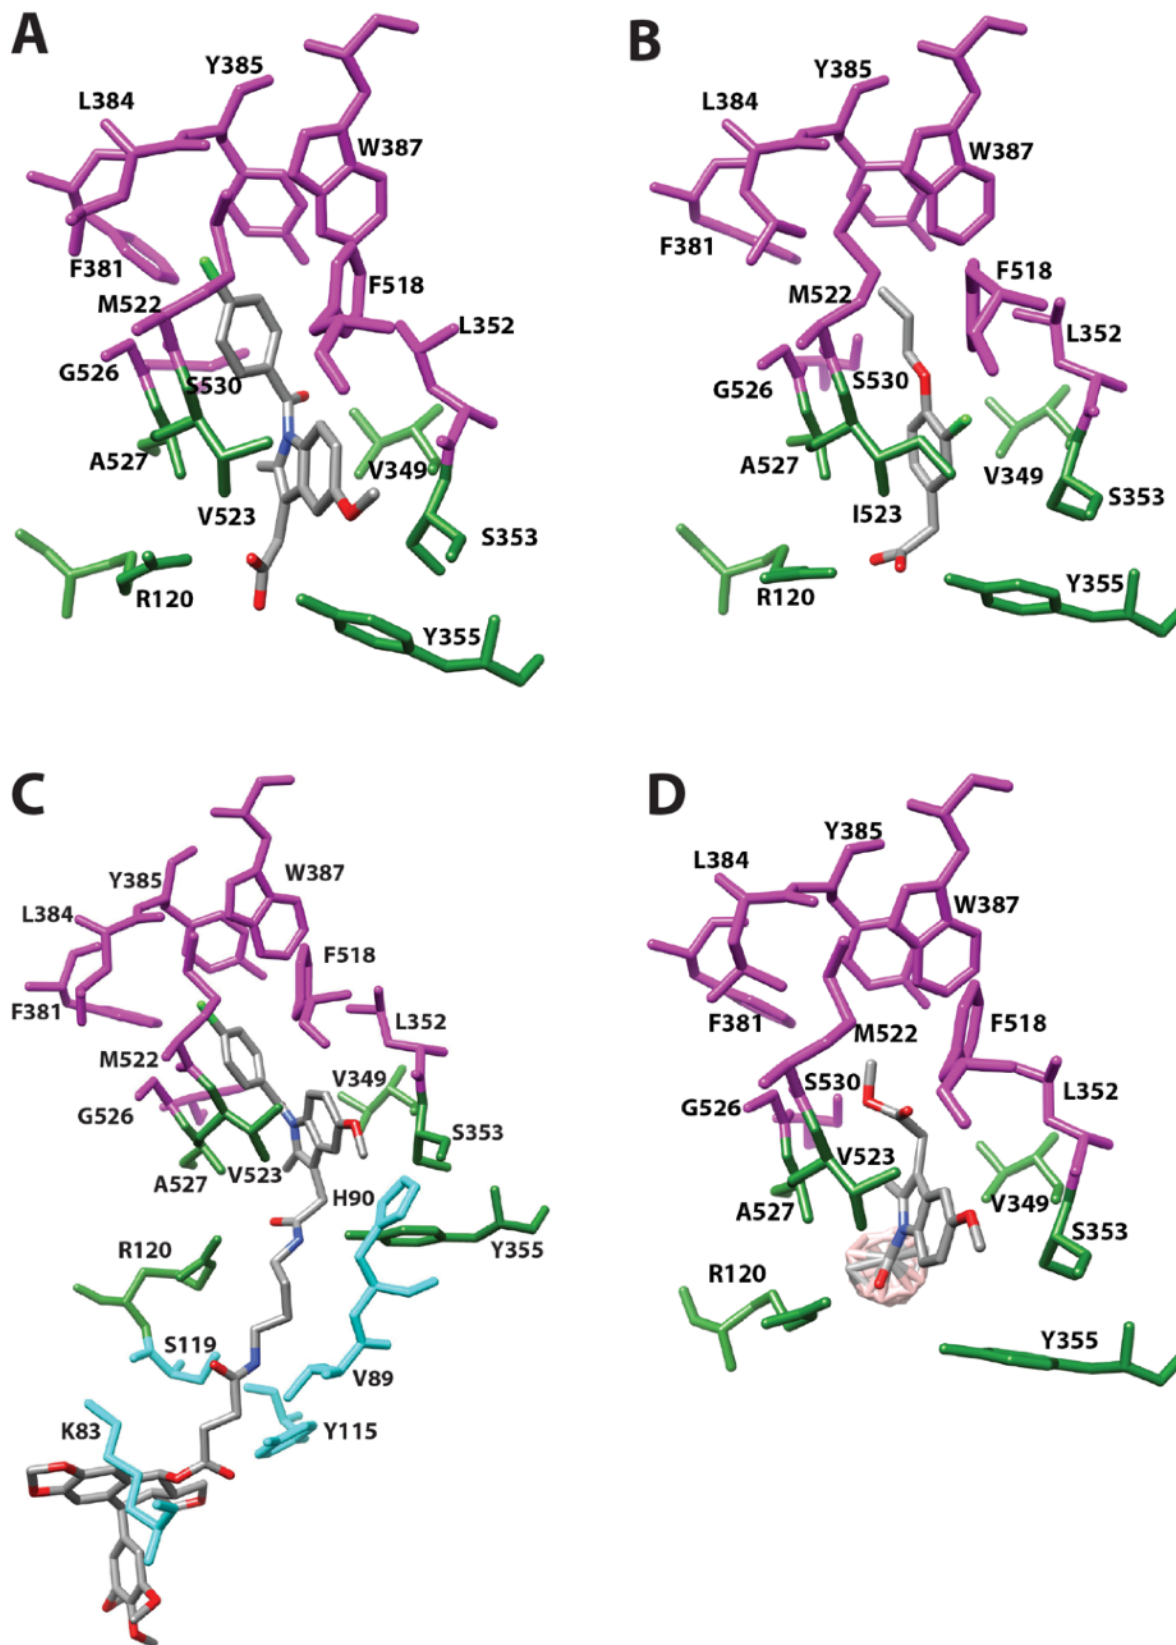

**Figure S8.** Structure of (A) indomethacin, (B) alclofenac, (C) an indomethacin-podophyllotoxin conjugate,

and (D) a *nido*-dicarbaborate derivative of indomethacin bound in the cyclooxygenase active site of COX-2 (A, C, & D) or COX-1 (B). The side chains that make up the proximal binding pocket (green), the central binding pocket (magenta), and membrane-binding domain residues that are predicted by molecular modeling to interact with the podophyllotoxin moiety (cyan) (C) are shown. From PDB #4COX, #1HT8, #4OTJ, and #4Z0L.

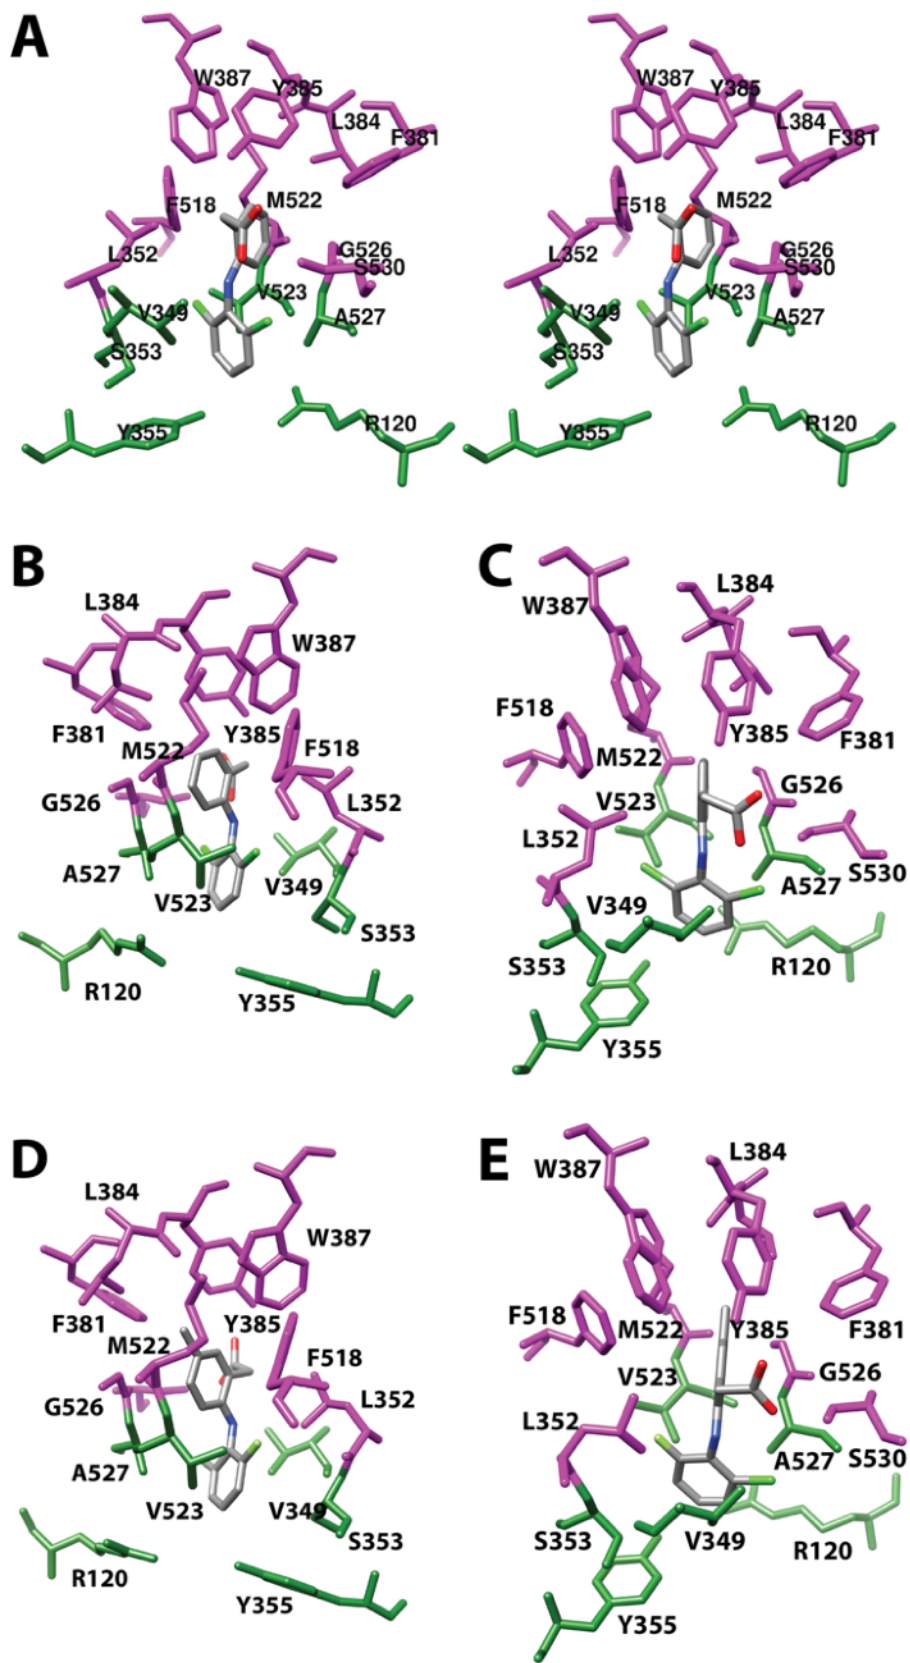

**Figure S9.** (A) Wall-eyed stereo view of diclofenac bound in the cyclooxygenase active site of COX-2.

Structures of (B & C) diclofenac and (D & E) lumiracoxib bound in the cyclooxygenase active site of COX-2. The side chains that make up the proximal binding pocket (green) and the central binding pocket (magenta) are shown. In each case, two views of the inhibitor are provided. Both are from the side (i.e., parallel to the plane of the membrane). Views (A, C, and E) highlight the proximity of the carboxylate of the inhibitor to the side chains of Ser-530 and Tyr-385. From PDB #1PXX and #4OTY.

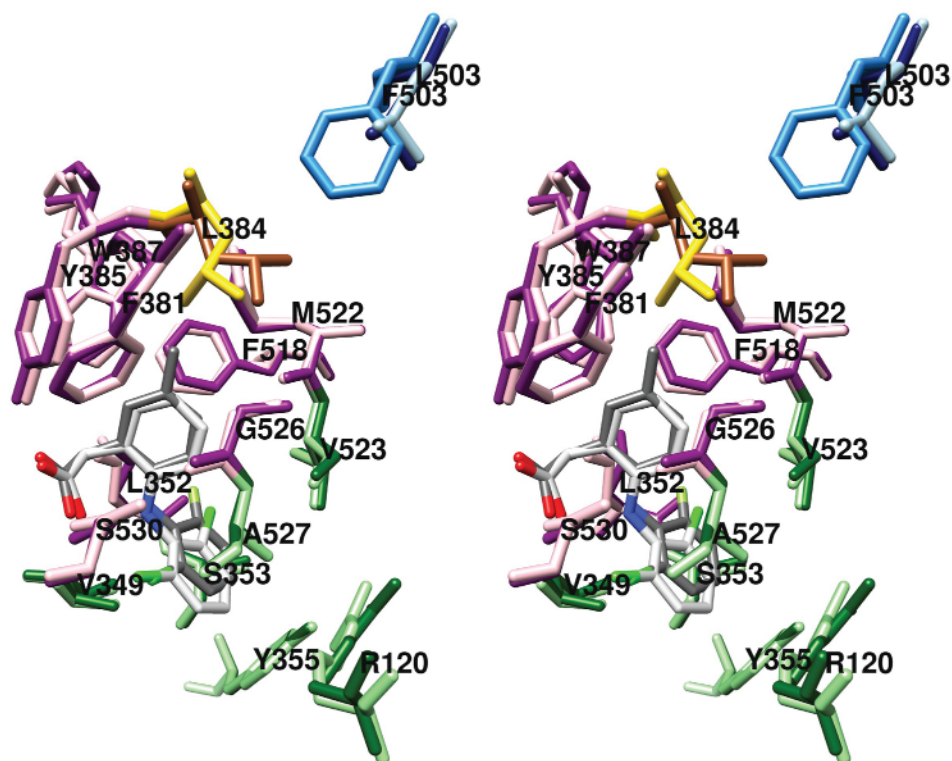

**Figure S10.** Wall-eyed stereo view of the overlay of the structures of diclofenac and lumiracoxib, bound in the cyclooxygenase active site of COX-2 and the side chains that make up the proximal binding pocket (light/dark green) and the central binding pocket (pink/magenta). Leu-384 is highlighted in gold/sienna, and Leu-503 is shown in light blue/navy blue. Also shown is the position that Phe-503 (dodger blue) occupies in the structure of diclofenac bound in the cyclooxygenase active site of COX-1. In each case, structures related to diclofenac (light gray) are shown in the lighter color and those related to lumiracoxib (dark gray) are shown in the darker color. From PDB #1PXX, #4OTY, and #3N8Y.

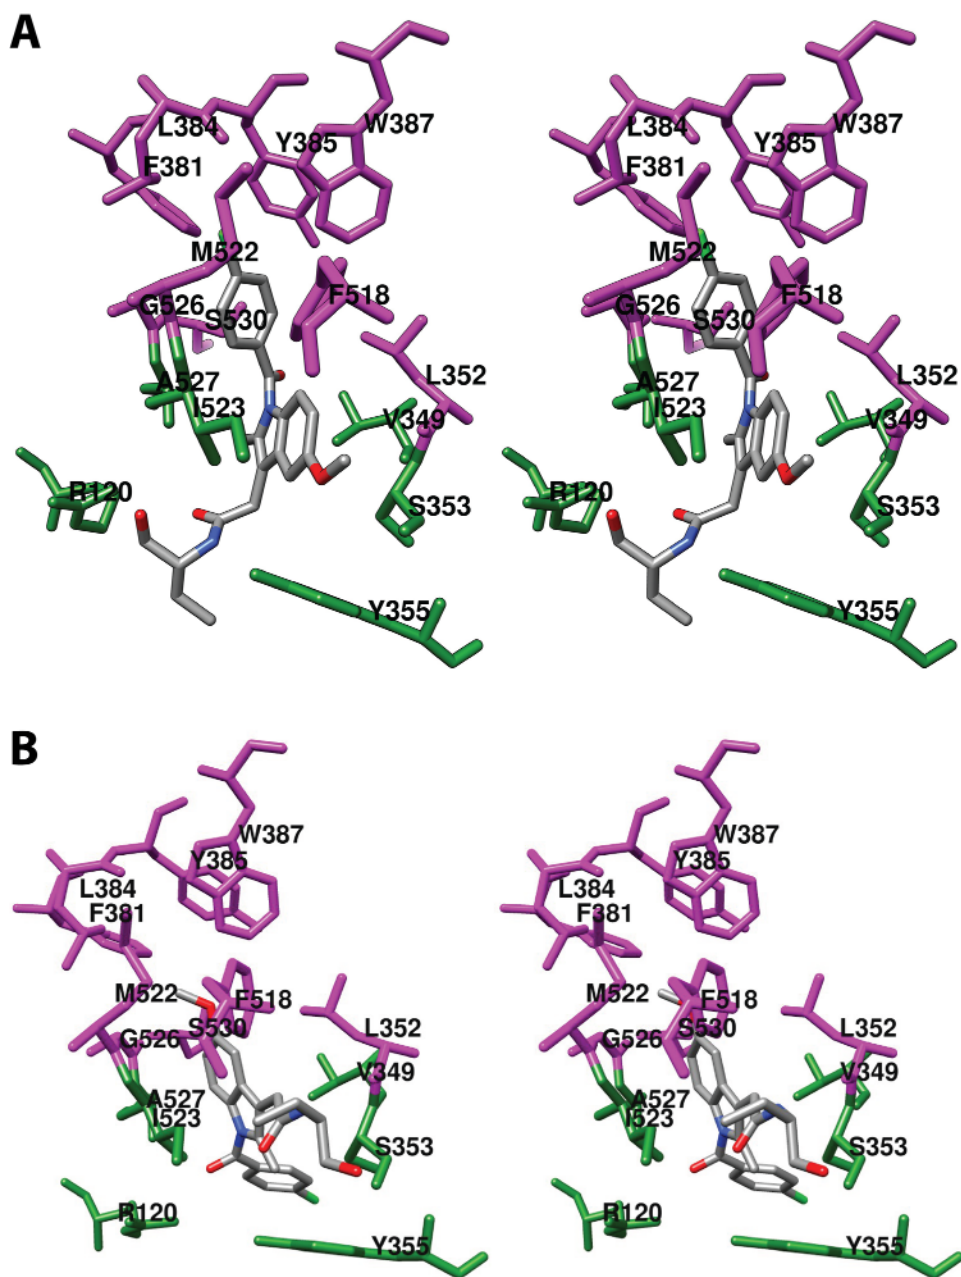

**Figure S11.** Wall-eyed stereo view of the structure of (A) indomethacin-(*R*)- $\alpha$ -ethyl-ethanolamide and (B) indomethacin-(*S*)- $\alpha$ -ethyl-ethanolamide bound in the cyclooxygenase active site of COX-2 and the side chains that make up the proximal binding pocket (green) and the central binding pocket (magenta). From PDB #2OYE and #2OYU.



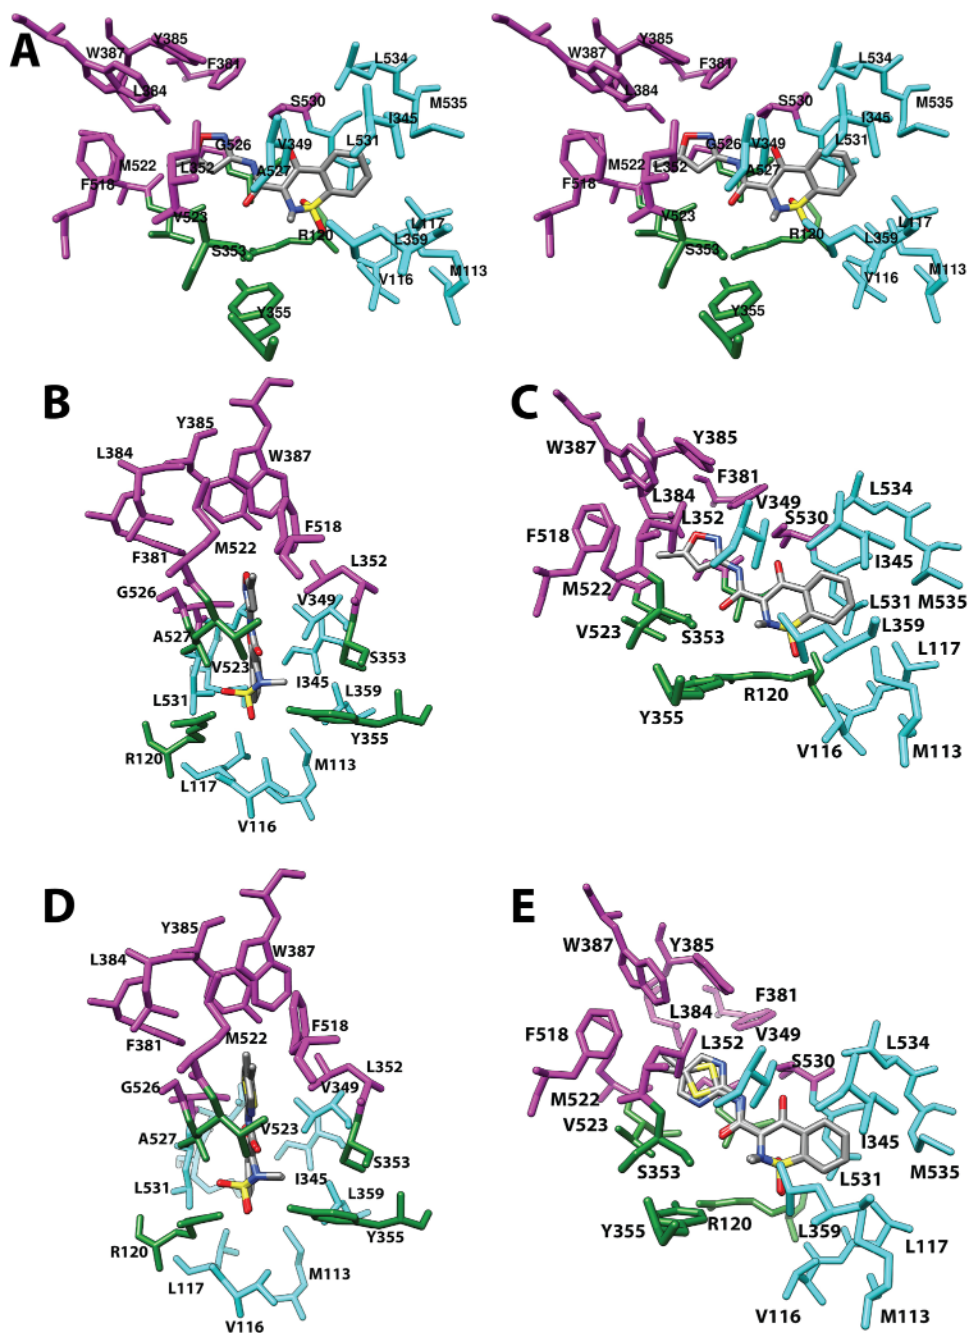

**Figure S12.** (A) Wall-eyed stereo view of isoxicam bound in the cyclooxygenase active site of COX-2. Structure of (B & C) isoxicam and (D & E) meloxicam bound in the cyclooxygenase active site of COX-2. The side chains that make up the proximal binding pocket (green), the central binding pocket (magenta), and the oxamic pocket (cyan) are shown. Note that Val-349 is part of both the proximal pocket and the oxamic pocket. It is colored in cyan. The exact conformation of the thiazole ring of meloxicam could not be determined. From PDB #4M10 and #4M11.

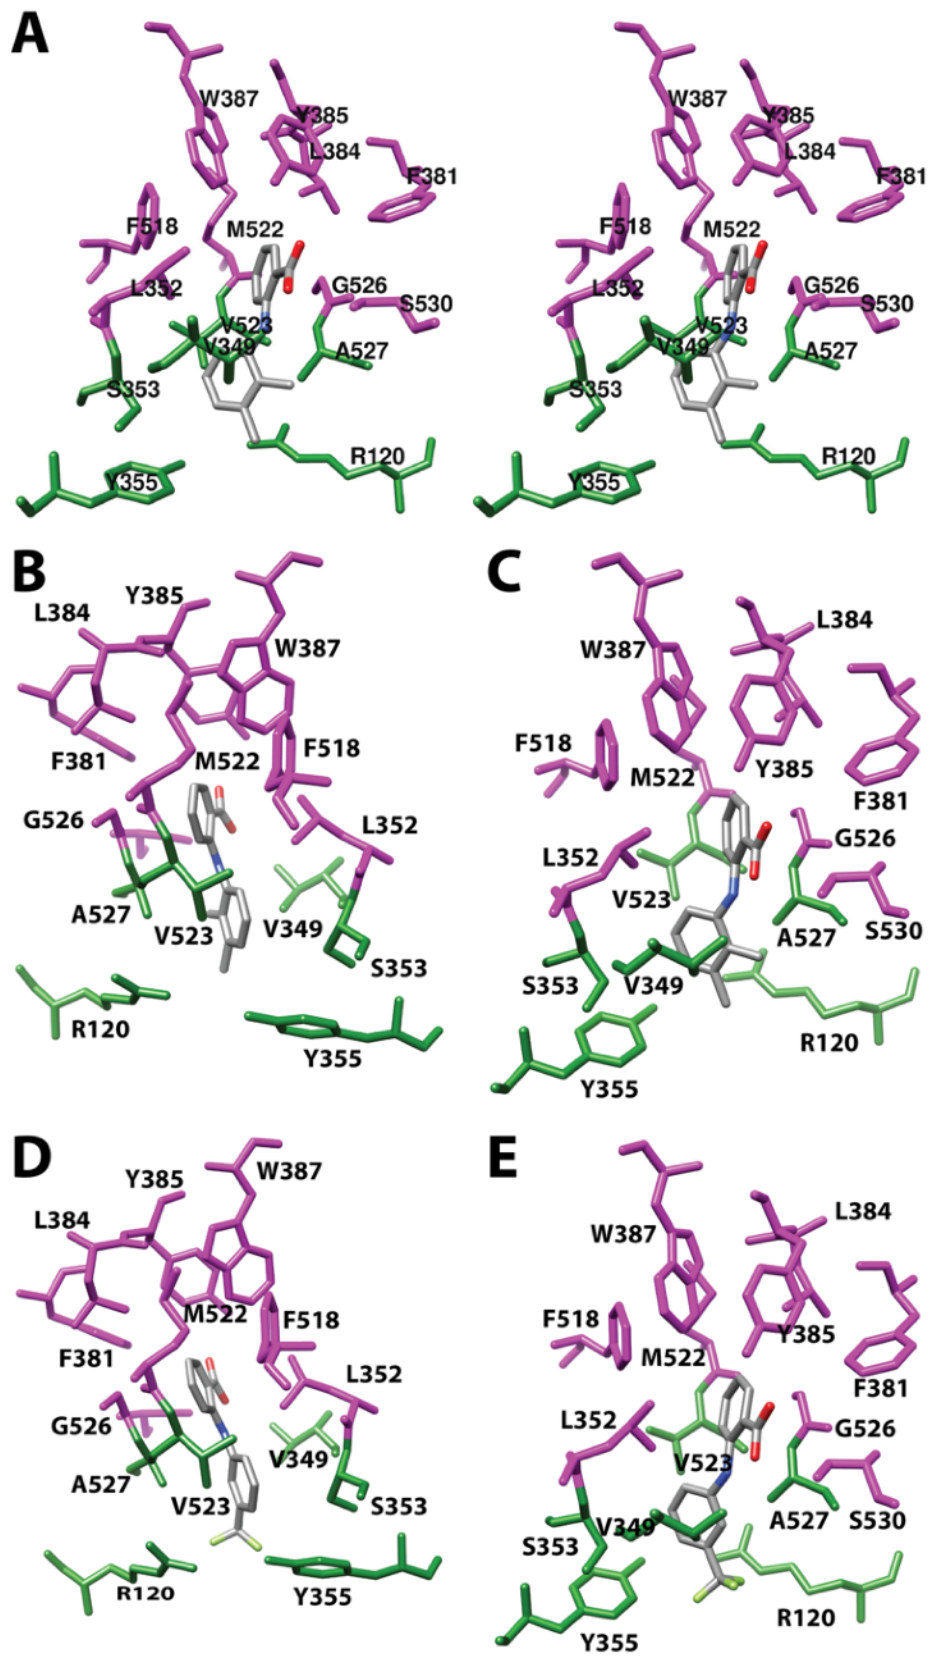

Figure S13. (A) Wall-eyed stereo view of mefenamic acid bound in the cyclooxygenase active site of

COX-2. Structures of (B & C) mefenamic acid and (D & E) flufenamic acid bound in the cyclooxygenase active site of COX-2. The side chains that make up the proximal binding pocket (green) and the central binding pocket (magenta) are shown. In each case, two views of the inhibitor are provided. Both are from the side (i.e., parallel to the plane of the membrane). Views (A), (C), and (E) highlight the proximity of the carboxylate of the inhibitor to the side chains of Ser-530 and Tyr-385. From PDB #5IKR and #5IKV.

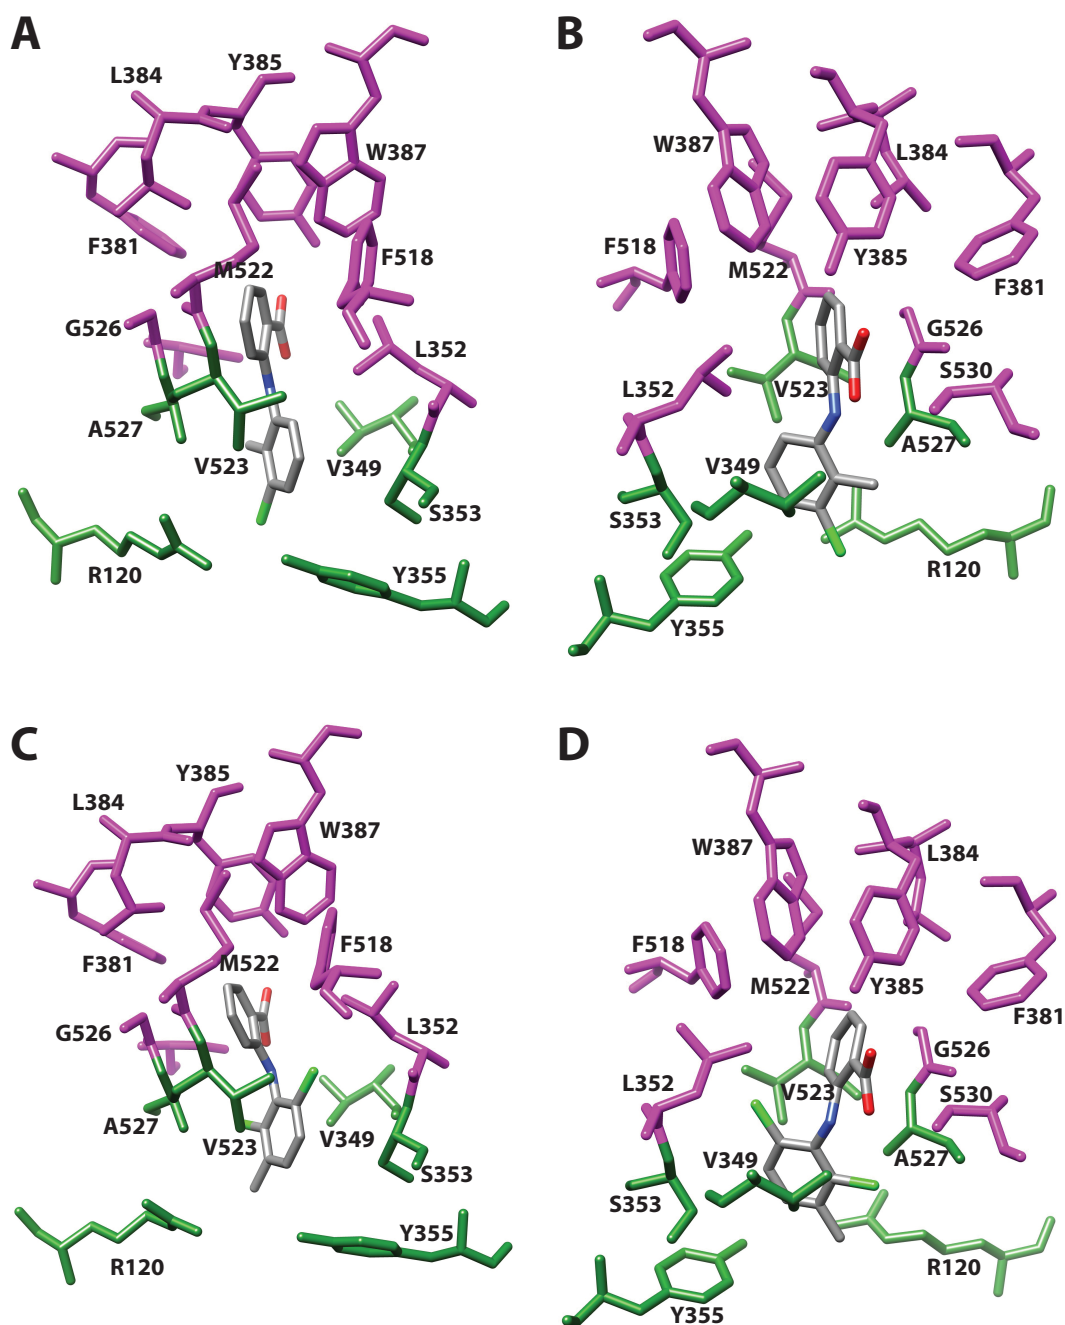

**Figure S14.** Structure of (A & B) tolfenamic acid and (C & D) meclofenamic acid bound in the cyclooxygenase active site of COX-2 and the side chains that make up the proximal binding pocket (green) and the central binding pocket (magenta). In each case, two views of the inhibitor are shown. Both are from the side (i.e., parallel to the plane of the membrane). Views (B) and (D) highlight the proximity of the carboxylate of the inhibitor to the side chains of Ser-530 and Tyr-385. From PDB #5IKT and #5IKQ.

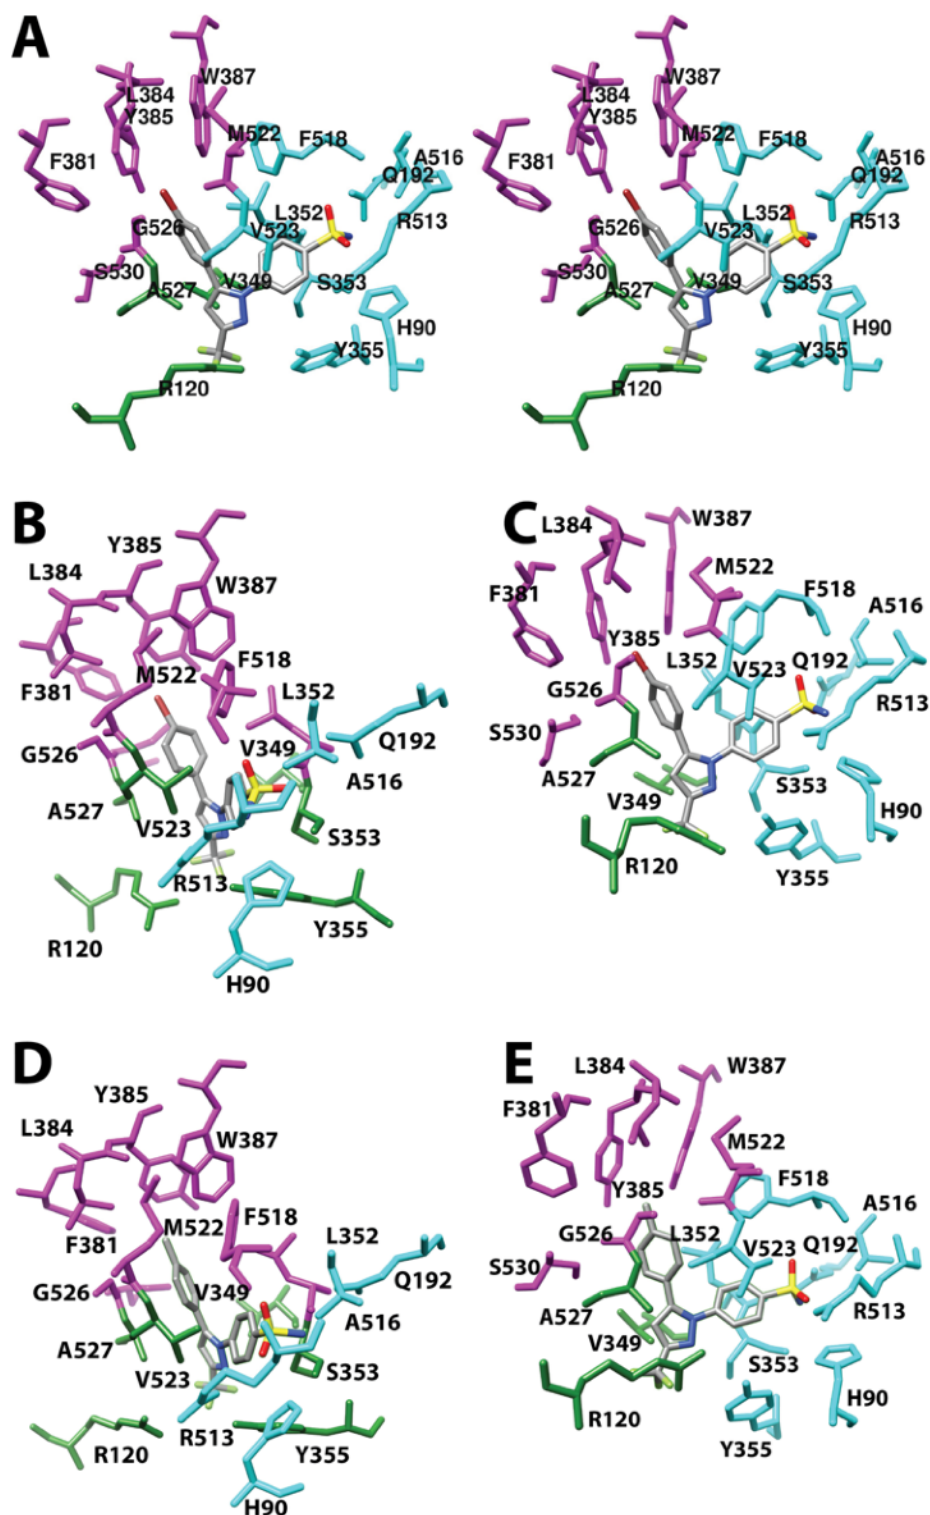

**Figure S15.** (A) Wall-eyed stereo view of SC-558 bound in the cyclooxygenase active site of COX-2. Structures of SC-558 (B & C) and celecoxib (D & E) bound in the cyclooxygenase active site of COX-2. The side chains that make up the proximal binding pocket (green), the central binding pocket (magenta), and the COX-2 side pocket (cyan) are shown. In (B) and (D), the residues are colored as in most previous figures. In (A), (C), and (E), some residues in the proximal and central binding pockets that are shared

with the COX-2 side pocket are colored cyan to highlight the interaction with the phenylsulfonamide group of each inhibitor. From PDB #6COX and #3LN1.



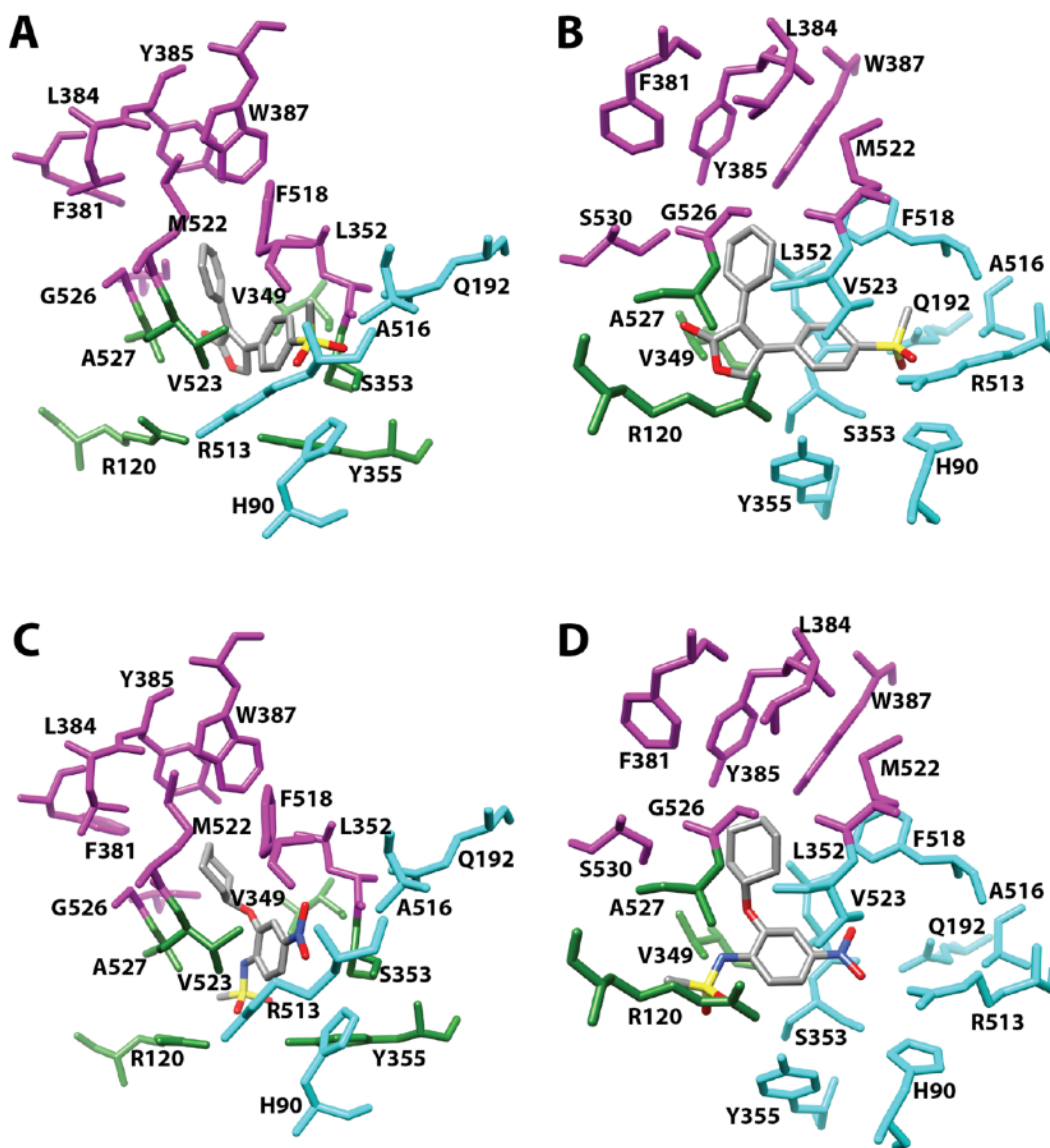

**Figure S16.** Structure of (A & B) rofecoxib and (C & D) NS-398 bound in the cyclooxygenase active site of COX-2 and the side chains that make up the proximal binding pocket (green), the central binding pocket (magenta), and the COX-2 side pocket (cyan). In (A) and (C), the residues are colored as in most previous figures. In (B) and (D), some residues in the proximal and central binding pockets that are shared with the COX-2 side pocket are colored cyan to highlight the interaction with the phenylmethylsulfone group of rofecoxib and the absence of an interaction with the side pocket in the case of NS-398. From PDB #5KIR and #3QMO.

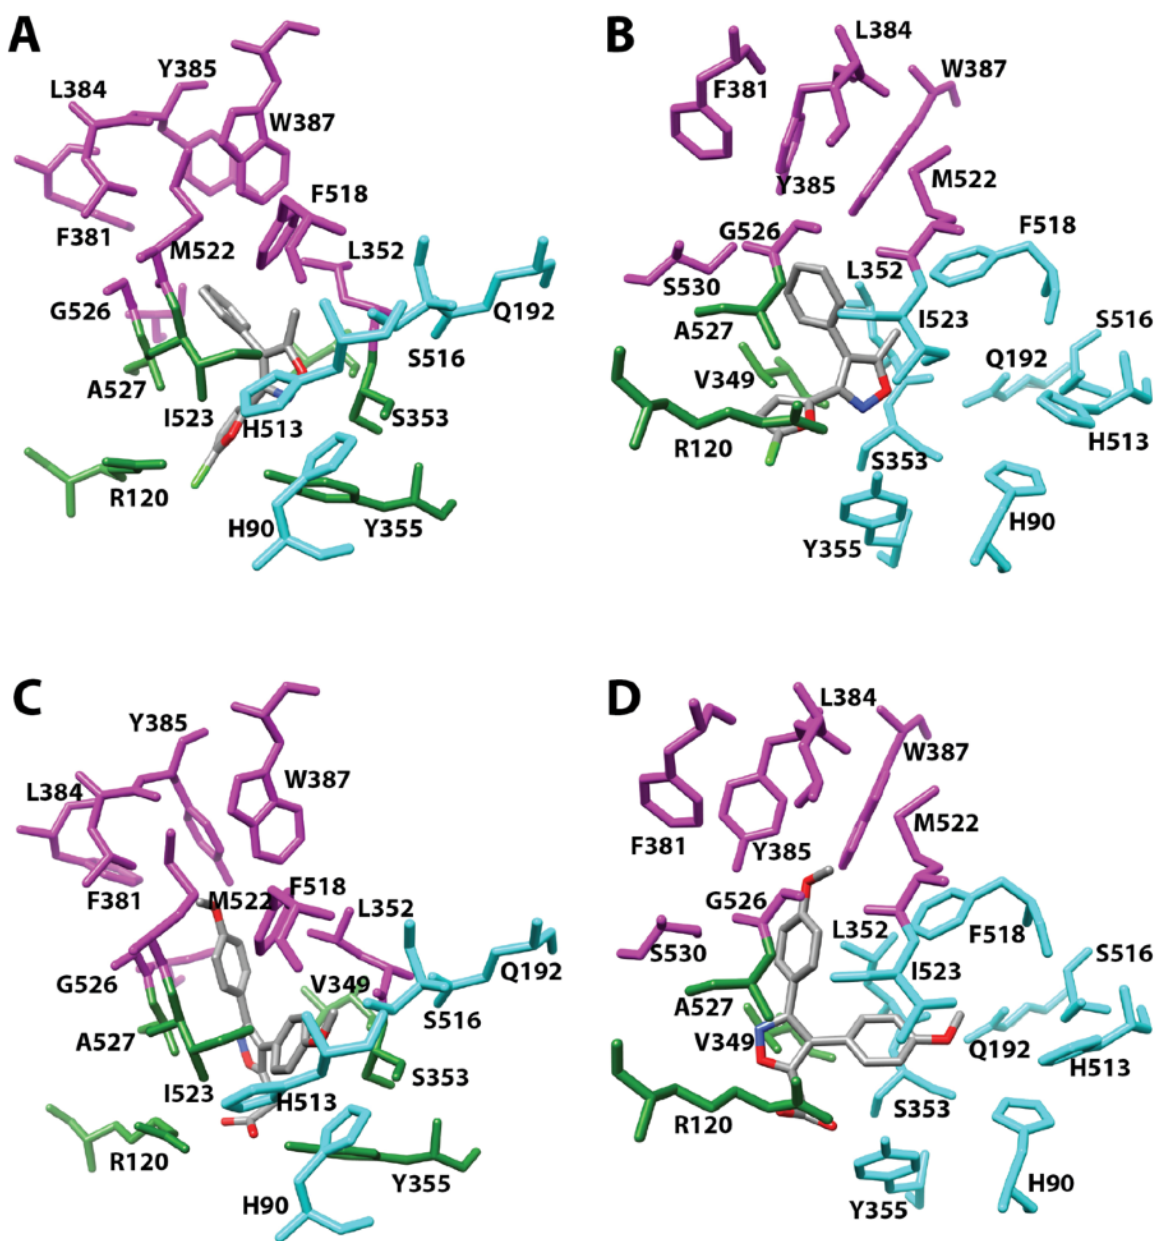

**Figure S17.** Structure of (A & B) P6 and (C & D) mofezolac bound in the cyclooxygenase active site of COX-1 and the side chains that make up the proximal binding pocket (green), the central binding pocket (magenta), and residues corresponding to the COX-2 side pocket (cyan). In (A) and (C), the residues are colored as in most previous figures. In (B) and (D), some residues in the proximal and central binding pockets that are shared with the COX-2 side pocket are colored cyan to highlight the interaction with the methoxybenzyl group of mofezolac and the absence of a significant interaction with the side pocket in the case of P6. From PDB #5U6X and #5WBE.



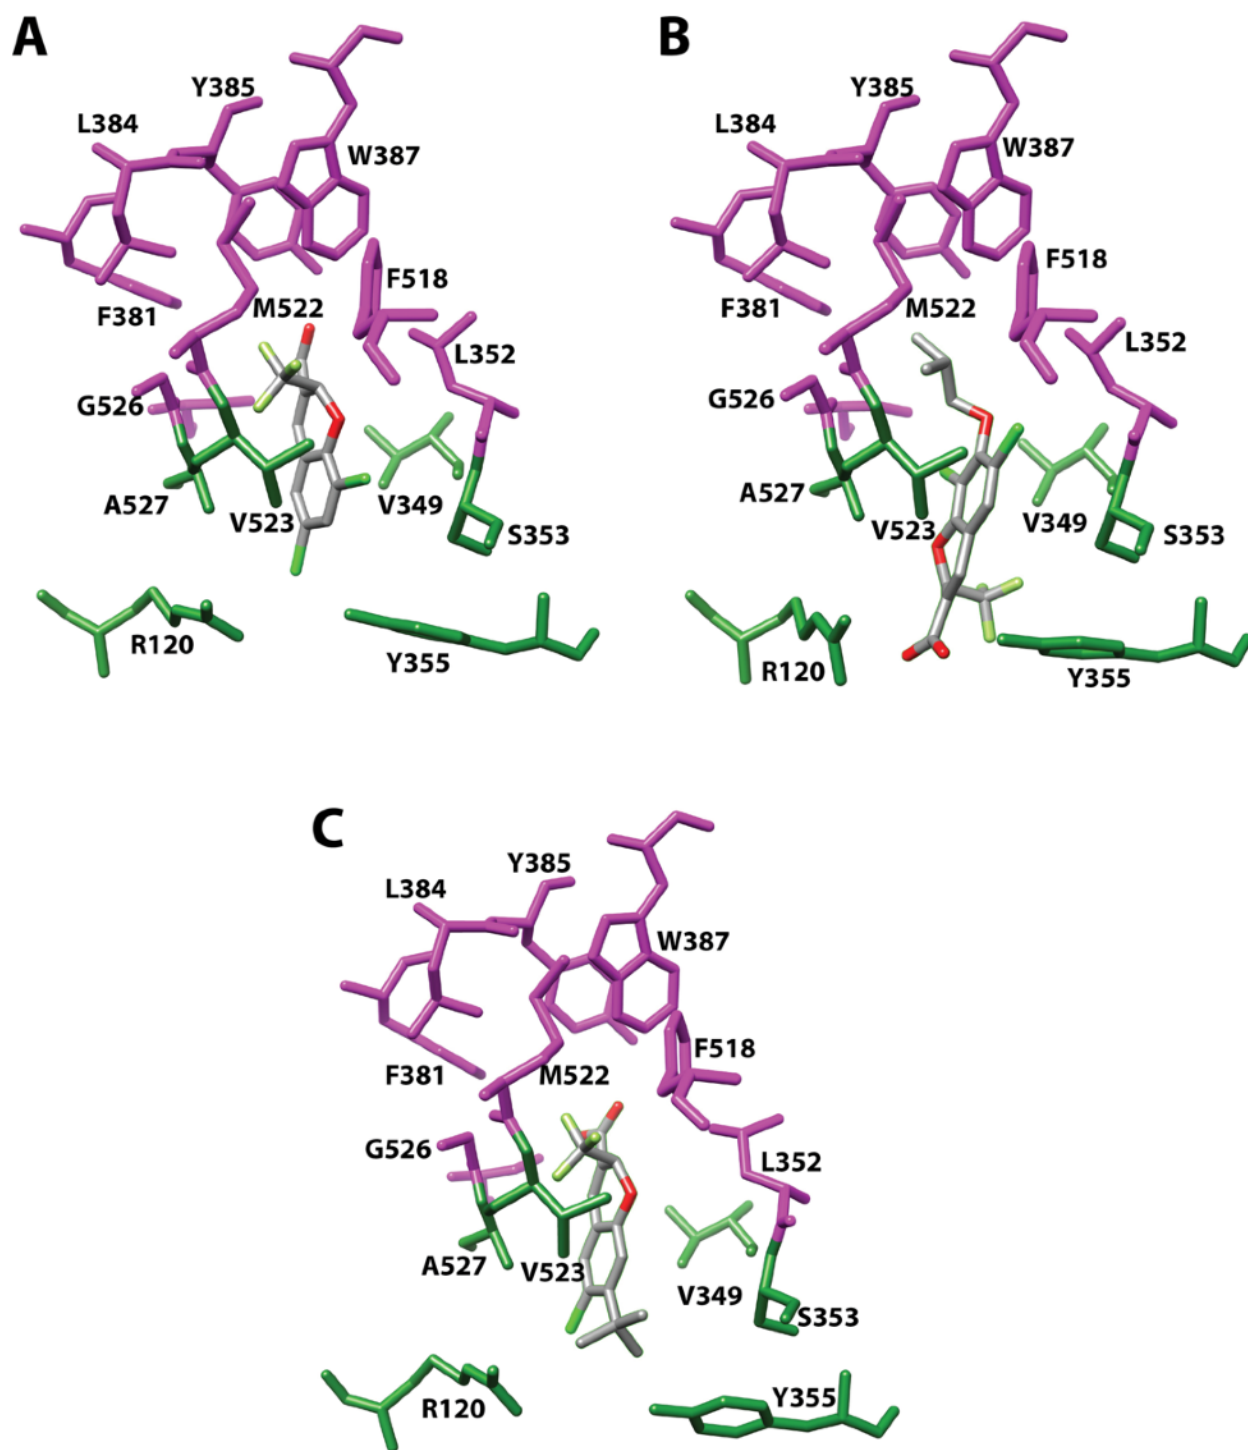

**Figure S18.** Structure of (A) (*S*)-5c, (B) (*R*)-23d, and (C) (*S*)-SC-75416 bound in the cyclooxygenase active site of COX-2 and the side chains that make up the proximal binding pocket (green) and the central binding pocket (magenta). From PDB #3LN0, #3NTG, and 3MQE.

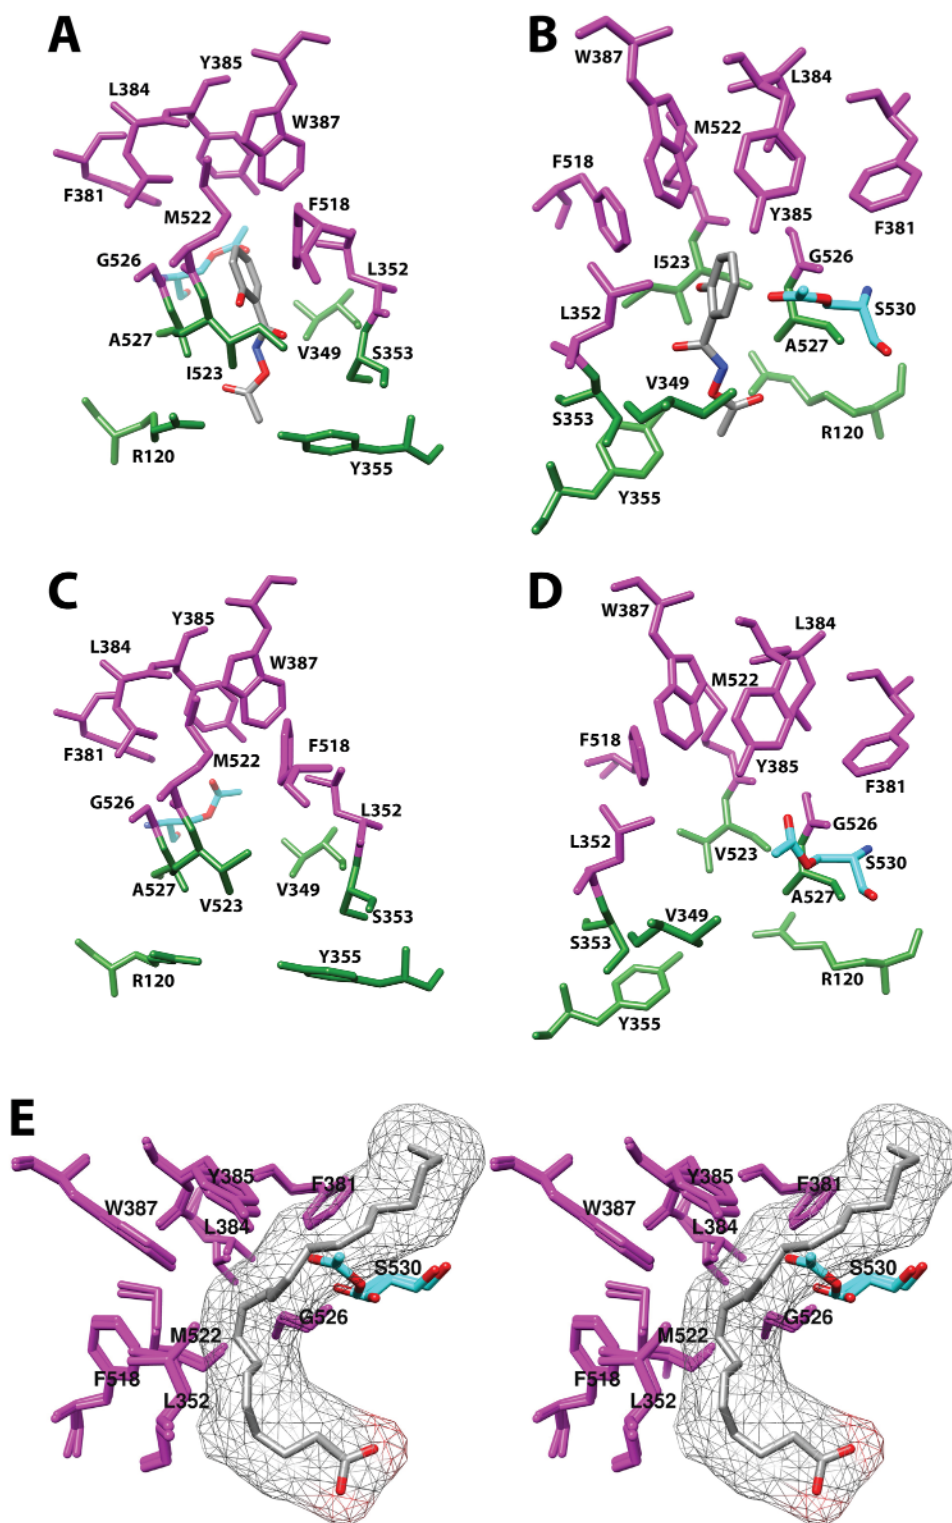

**Figure S19.** Structure of (A & B) acetylated COX-1 containing *O*-acetylsalicylhydroxamic acid bound in the cyclooxygenase active site and (C & D) acetylated COX-2. (E) Wall-eyed stereo view of the structure of acetylated COX-2 superimposed over the structure of the productive conformation of AA complexed with COX-2. AA is colored by atom, with its surface shown in mesh. The steric clash between AA and the acetyl group on Ser-530 can be readily seen. The side chains that make up the proximal binding pocket

(green, A-D) and the central binding pocket (magenta, A-E) are shown. The acetylated Ser-530 residue is colored by element on a cyan background. From PDB #1EBV and #5F19.

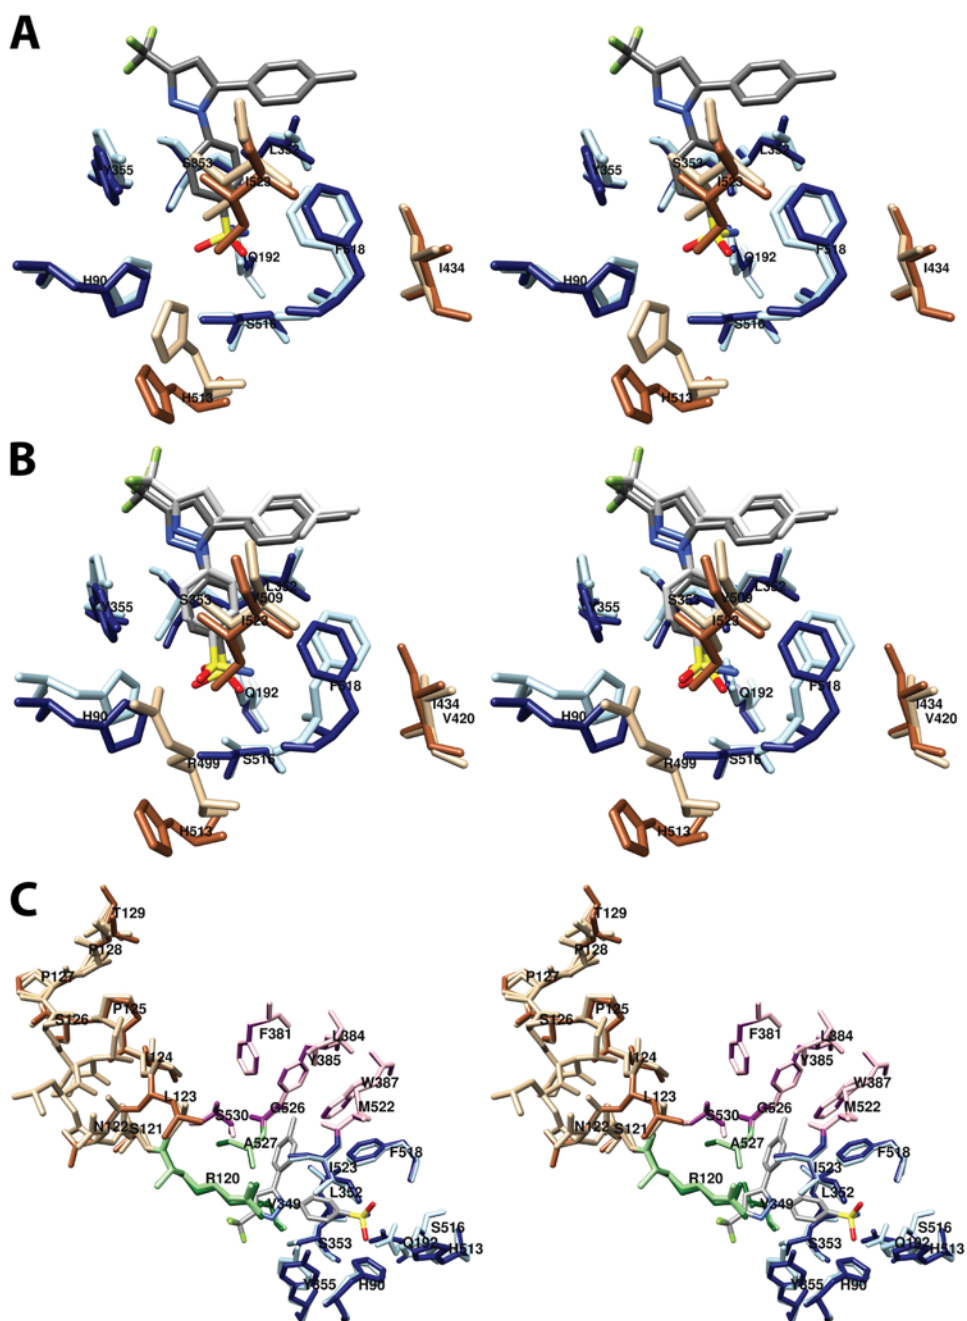

**Figure S20.** Wall-eyed stereo views of the structure of COX-1 complexed with celecoxib overlaid with (A) the structure of COX-1 complexed with (*S*)-flurbiprofen or (B) the structure of COX-2 complexed with celecoxib. Key residues making up the side pocket are shown in dark blue (COX-1-celecoxib complex) or light blue (alternative complexes). The residues that differ between COX-1 and COX-2 (Ile/Val-434, His/Arg-513, Ile/Val-523) are shown in sienna (COX-1-celecoxib complex) or tan (alternative complexes). Celecoxib is colored by heteroatom on a dark gray (COX-1-celecoxib complex) or light gray (COX-2-celecoxib complex) background. (*S*)-Flurbiprofen is not shown. Note that the numbering in the COX-2-celecoxib complex, for residues Val-434, His-513, and Val-523 use the actual COX-2 residue numbers of 420, 499, and 509, respectively, reflecting the numbers in the PDB file. (C) Wall-eyed stereo view of COX-1 complexed with celecoxib. The side chains that make up the proximal binding pocket (green), the central binding pocket (magenta), and the side pocket (blue) are shown. The structures of the two

subunits are overlaid with subunit A (containing celecoxib) shown in the darker colors. Also shown are residues 121-129, which exist in two conformations in subunit B depending on the presence or absence of bound celecoxib. Subunits containing inhibitor exhibit the same conformation as is observed in subunit A (sienna), whereas those lacking inhibitor diverge between Ser-121 and Pro-125. From PDB #3KK6, #1EHQ, and #3LN1.

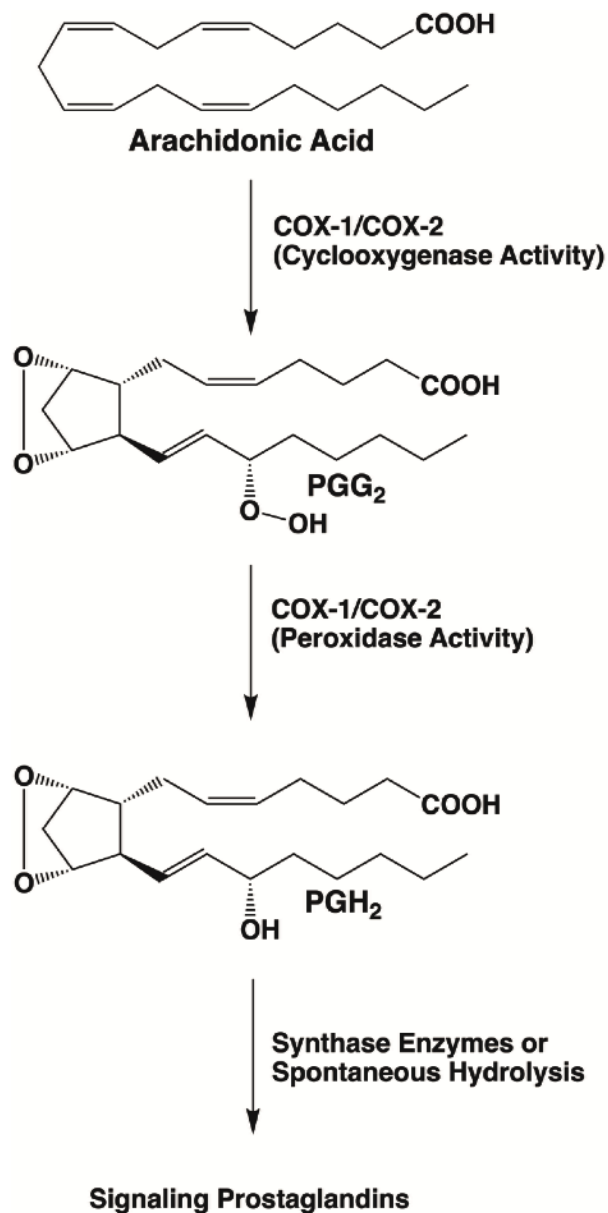

**Figure 1.** Prostaglandin (PG) biosynthetic pathway. *Bis*-dioxygenation and cyclization of arachidonic acid at the cyclooxygenase active site of COX-1 or COX-2 yields PGG<sub>2</sub>. Reduction of the 15-hydroperoxyl group of PGG<sub>2</sub> at the peroxidase active site of COX-1 or COX-2 yields PGH<sub>2</sub>. PGH<sub>2</sub> serves as substrate for five different synthases, producing four signaling PG products (PGE<sub>2</sub>, PGI<sub>2</sub>, PGF<sub>2α</sub>, PGD<sub>2</sub>) or thromboxane A<sub>2</sub> (TXA<sub>2</sub>). PGH<sub>2</sub> is chemically unstable under physiological conditions, and in the absence of the synthase enzymes, it is hydrolyzed to a mixture of PGE<sub>2</sub> and PGD<sub>2</sub>.

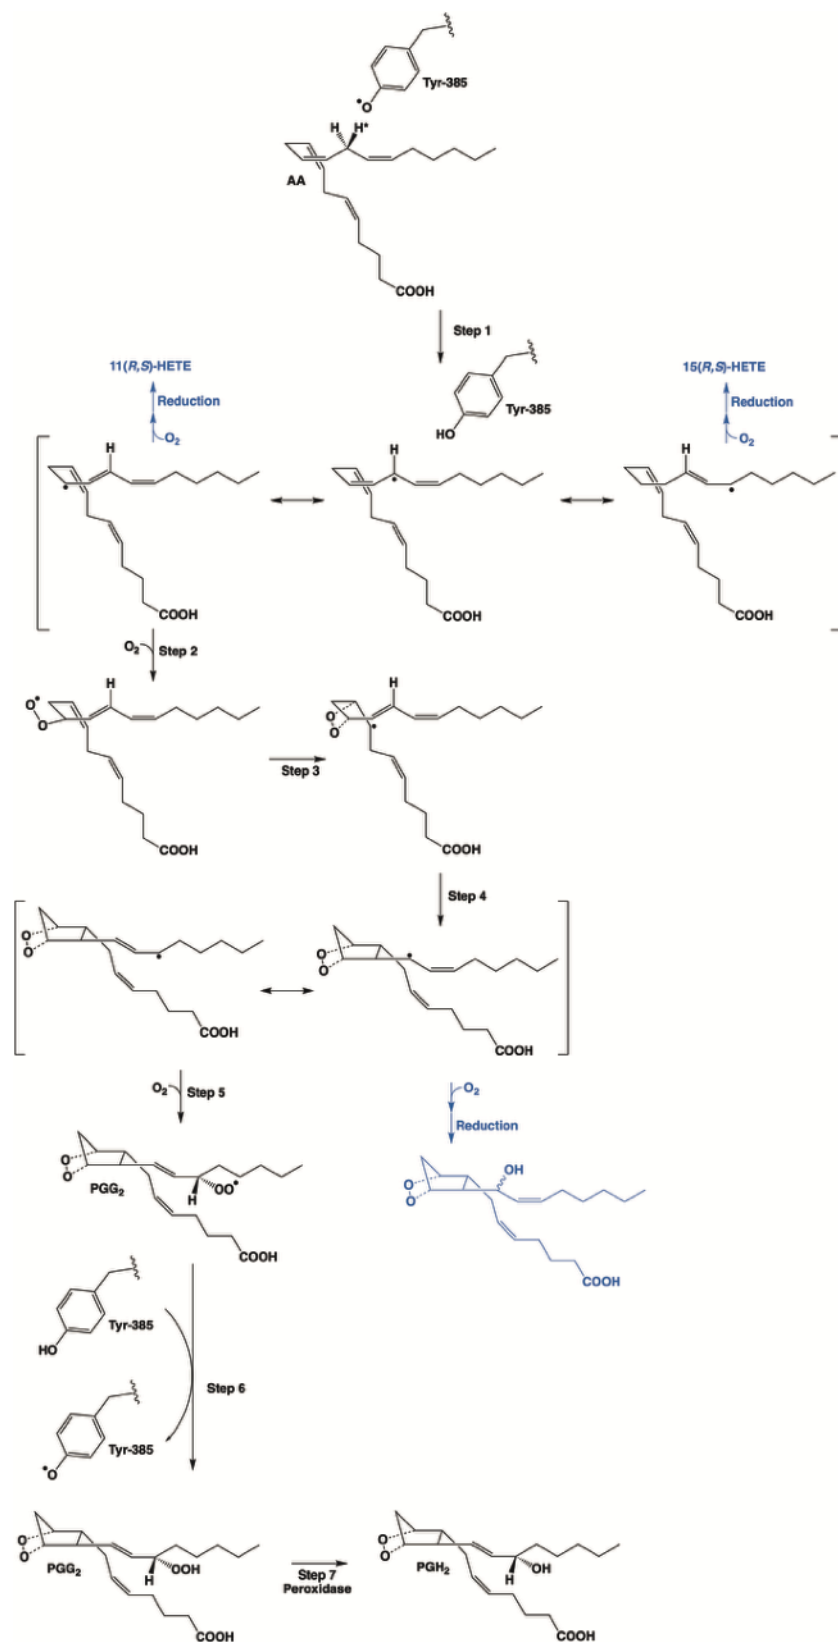

**Figure 2.** Proposed mechanism of the cyclooxygenase reaction. Activation of the COX enzymes occurs through oxidation of the heme prosthetic group during reduction of a peroxide substrate at the peroxidase

active site. Transfer of an electron from Tyr-385 in the cyclooxygenase active site to the heme then generates the catalytic tyrosyl radical. Step 1: The tyrosyl radical abstracts the 13-(*pro*)-*S*-hydrogen atom (indicated by an asterisk) from AA. Resonance places the unpaired electron at carbon-13, carbon-11, or carbon-15. Addition of oxygen at the carbon-11 or carbon-15 radical, followed by enzymatic or nonenzymatic reduction results in the 11(*R,S*)-HETE or 15(*R,S*)-HETE minor products (indicated in blue), respectively. Step 2: Antarafacial oxygen addition occurs at carbon-11. Step 3: The peroxy group then attacks carbon-9, forming the endoperoxide ring and placing the unpaired electron at carbon-8. Step 4: Bond formation between carbon-8 and carbon-12 generates the five-membered ring of PGG<sub>2</sub> and places the unpaired electron on carbon-13. Resonance enables migration of the unpaired electron to carbon-15. Step 5: Attack of oxygen at carbon-15 follows, generating a peroxy radical at that position. Step 6: Transfer of a hydrogen atom from Tyr-385 reduces the peroxy radical to a hydroperoxide, yielding PGG<sub>2</sub>, and regenerates the tyrosyl radical for a new round of catalysis. Step 7: Reduction of PGG<sub>2</sub> at the peroxidase active site yields PGH<sub>2</sub>. Alternatively, attack of oxygen at carbon-13 rather than carbon-15 in step 5 followed by enzymatic or nonenzymatic reduction leads to a PGH<sub>2</sub> analog with the hydroxyl group at carbon-13 (shown in blue). Note that the overall mechanism requires a peroxidase turnover to produce the catalytic tyrosyl radical, but once this has occurred, the cyclooxygenase reaction is self-perpetuating.



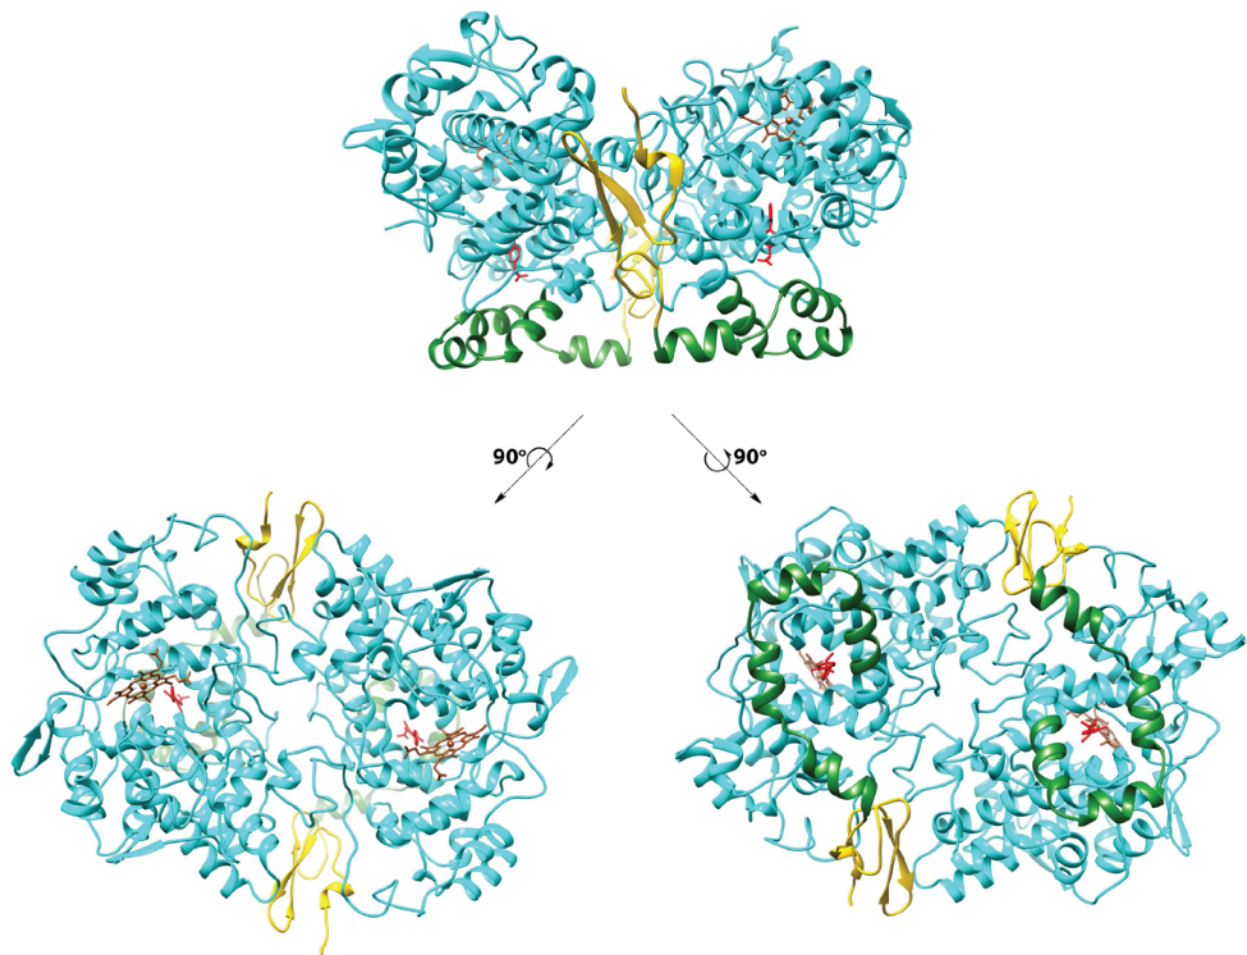

**Figure 3.** Domain structure of the cyclooxygenases. The top view shows the dimeric protein (COX-1) as observed from the side (i.e., parallel to the plane of the membrane). Each of the bottom views follows rotation of the top view by 90°. To the left, the protein is viewed looking down on the enzyme from above. To the right, the protein is viewed looking up from below. In all cases, the epidermal growth factor domain is gold, the membrane-binding domain is green, the catalytic domain is cyan, heme is sienna, and the flurbiprofen ligand is red. The membrane-binding domain inserts into the top leaflet of the underlying membrane bilayer. From PDB #1CQE.

**A**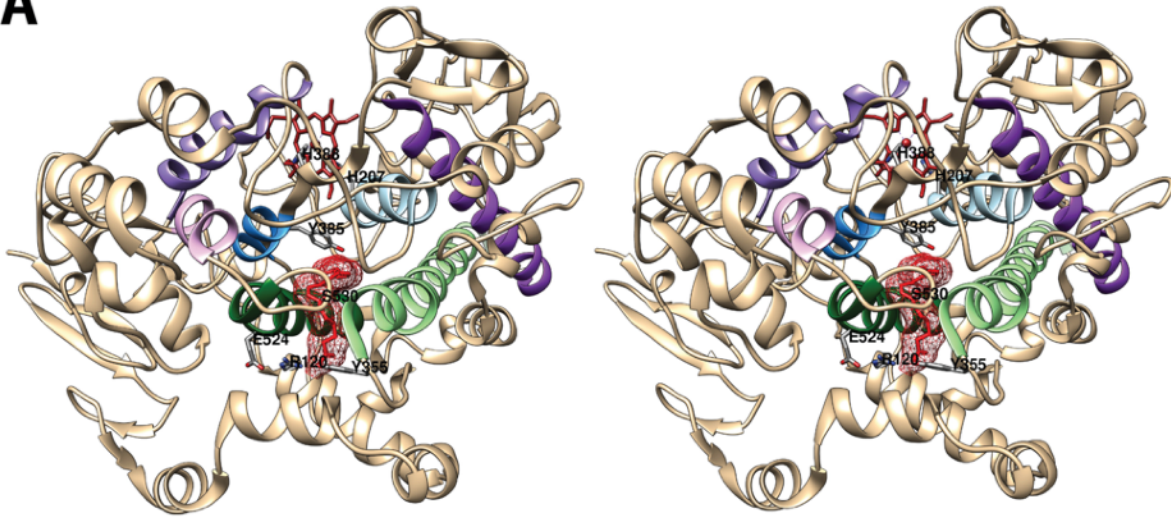**B**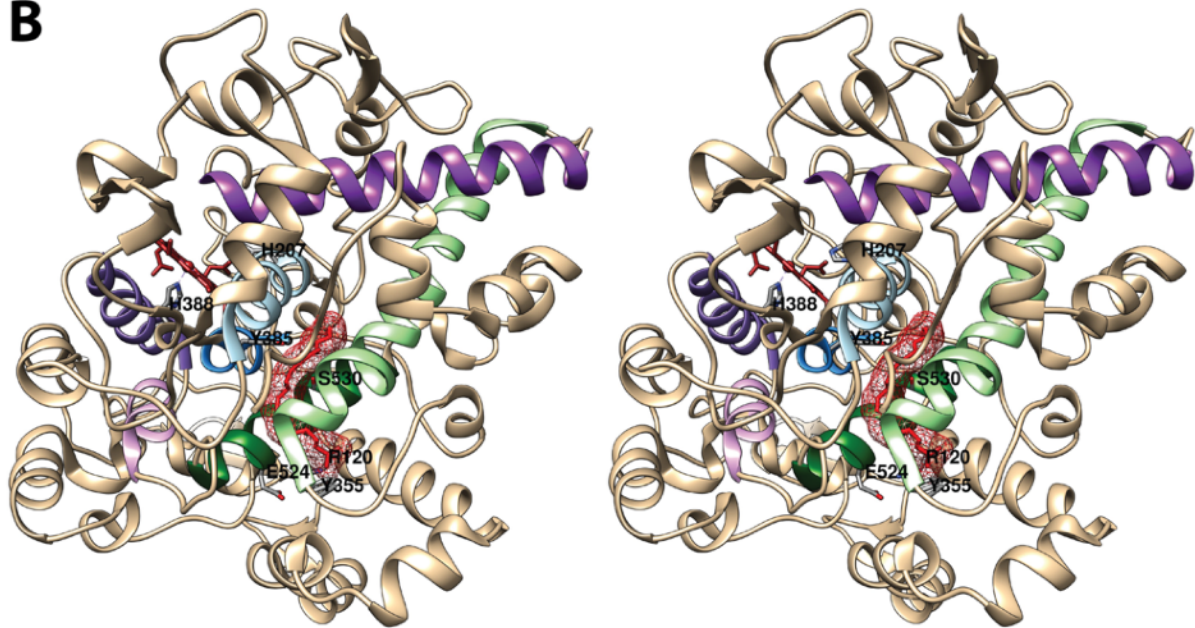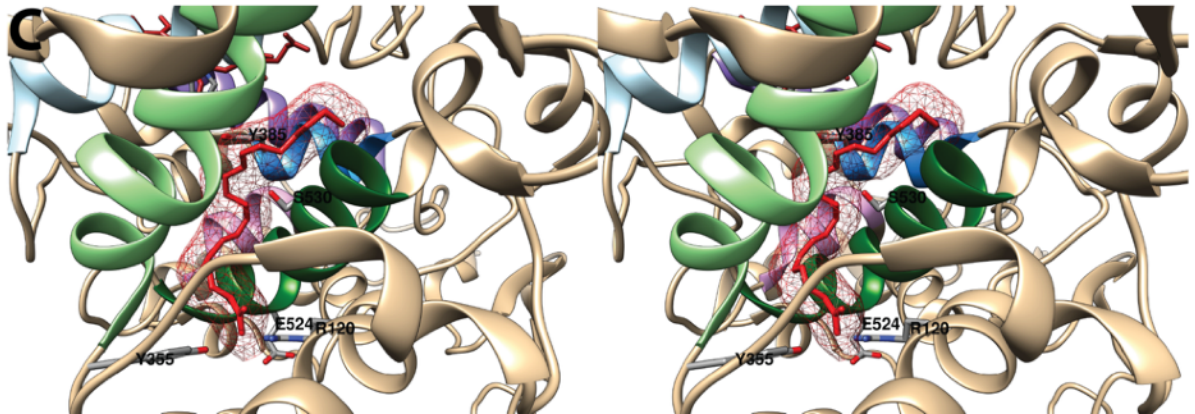

**Figure 4.** Structure of the cyclooxygenase active site. Two Cross-eyed stereo views of the COX-1 monomer (A and B) and a close-up view of the cyclooxygenase active site (C) are shown as observed

from the side (i.e., parallel to the plane of the membrane). In all cases, Co<sup>3+</sup>-protoporphyrin IX (an inactive heme analog) is dark brown, and AA is red mesh. The side chains of the constriction residues (Arg-120, Tyr-355, and Glu-524) are displayed and labeled, as are the catalytic residue (Tyr-385) and the target of aspirin-mediated inactivation (Ser-530), which are located at the bend of the L-shaped channel. In A and B, His-388, the proximal heme ligand, and His-207, which serves as the distal heme ligand through a coordinating water molecule, are visible. Helices 2 (residues 195-207, light blue), 8 (residues 378-385, medium blue), 6 (residues 324-354, light green), and 17 (residues 519-535, dark green), which surround the active site, along with helices 5 (residues 295-320, dark purple), 11/12 (residues 444-459, medium purple), and 16 (residues 503-510, light purple) form a bundle that is conserved among a number of peroxidases, with helices 2, 5, 6, 8, and 11/12 involved in binding the heme prosthetic group. From PDB #1DIY.



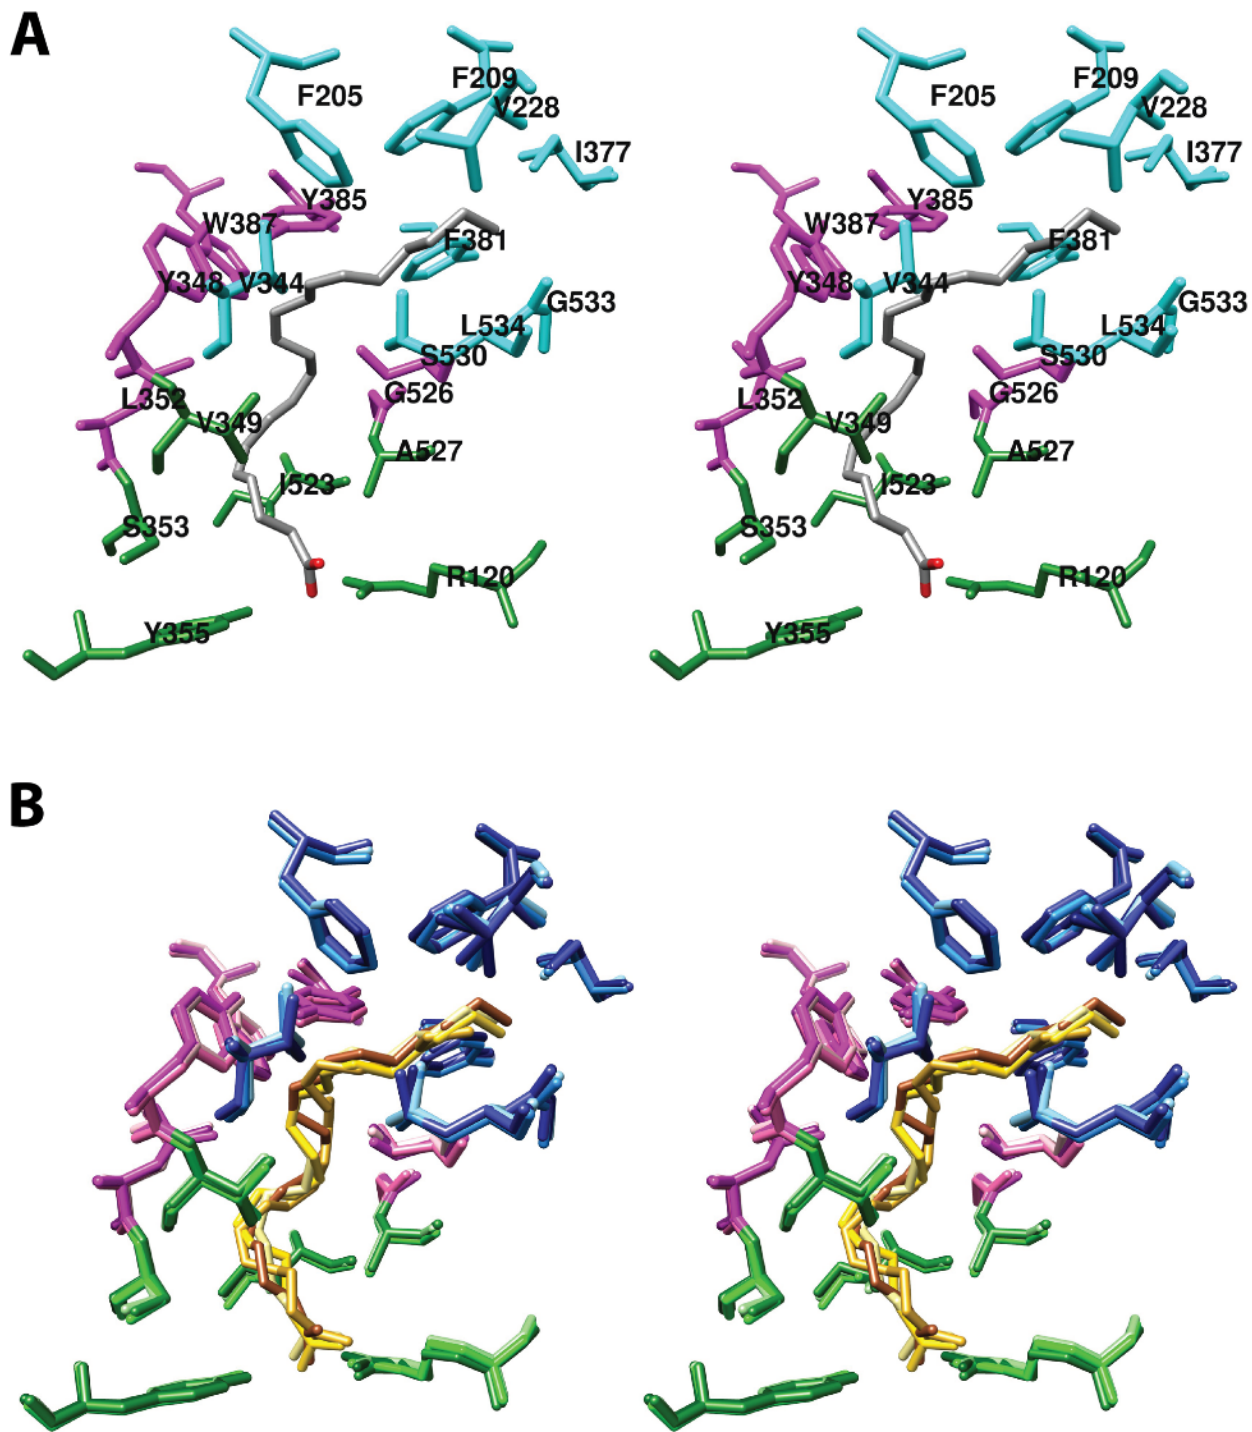

**Figure 5.** (A) Cross-eyed stereo view of AA bound in the cyclooxygenase active site of COX-1 and the side chains that make up the proximal binding pocket (green), the central binding pocket (magenta), and the distal binding pocket (cyan). This view is similar to that used to depict most structures of fatty acids in complex with COX-1 or COX-2 throughout the review. (B) Cross-eyed stereo view of an overlay of the structures of four fatty acids in the active site of COX-1. Fatty acids and amino acid side chains are colored from lightest to darkest in the order LA, DHLA, EPA, and AA. Notable is the minimal movement of active site residues to accommodate the structural differences among the various fatty acids. Monoscopic

views of the individual structures are provided in Figure S1. From PDB #1DIY (A & B) and #1IGZ, #1FE2, and #1IGX (B only).

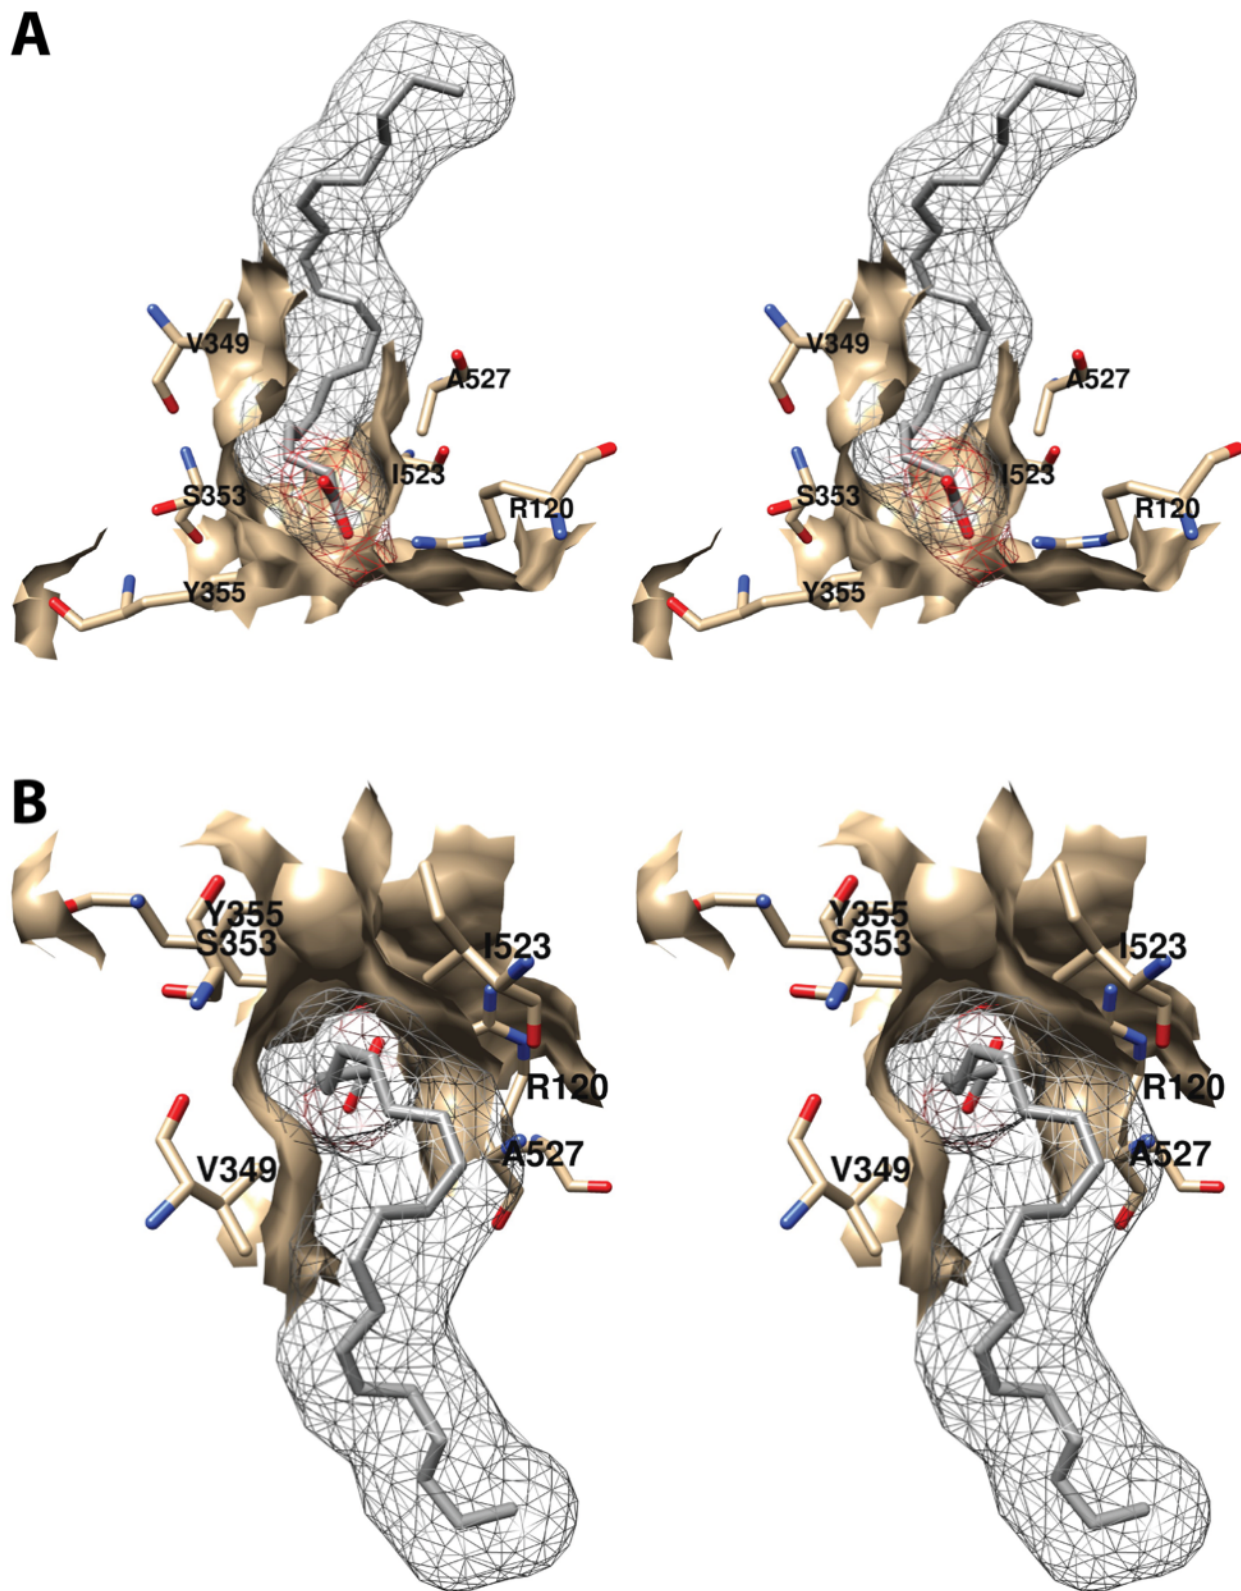

**Figure 6.** Cross-eyed stereo view of the proximal AA binding pocket as observed from the side (i.e., parallel to the plane of the membrane) (A) or looking downward toward the membrane from above (B). AA

is colored by element, and its surface is shown as a mesh. Side chains of the residues comprising the pocket are displayed, and their surface is shown in solid tan. From PDB #1DIY.

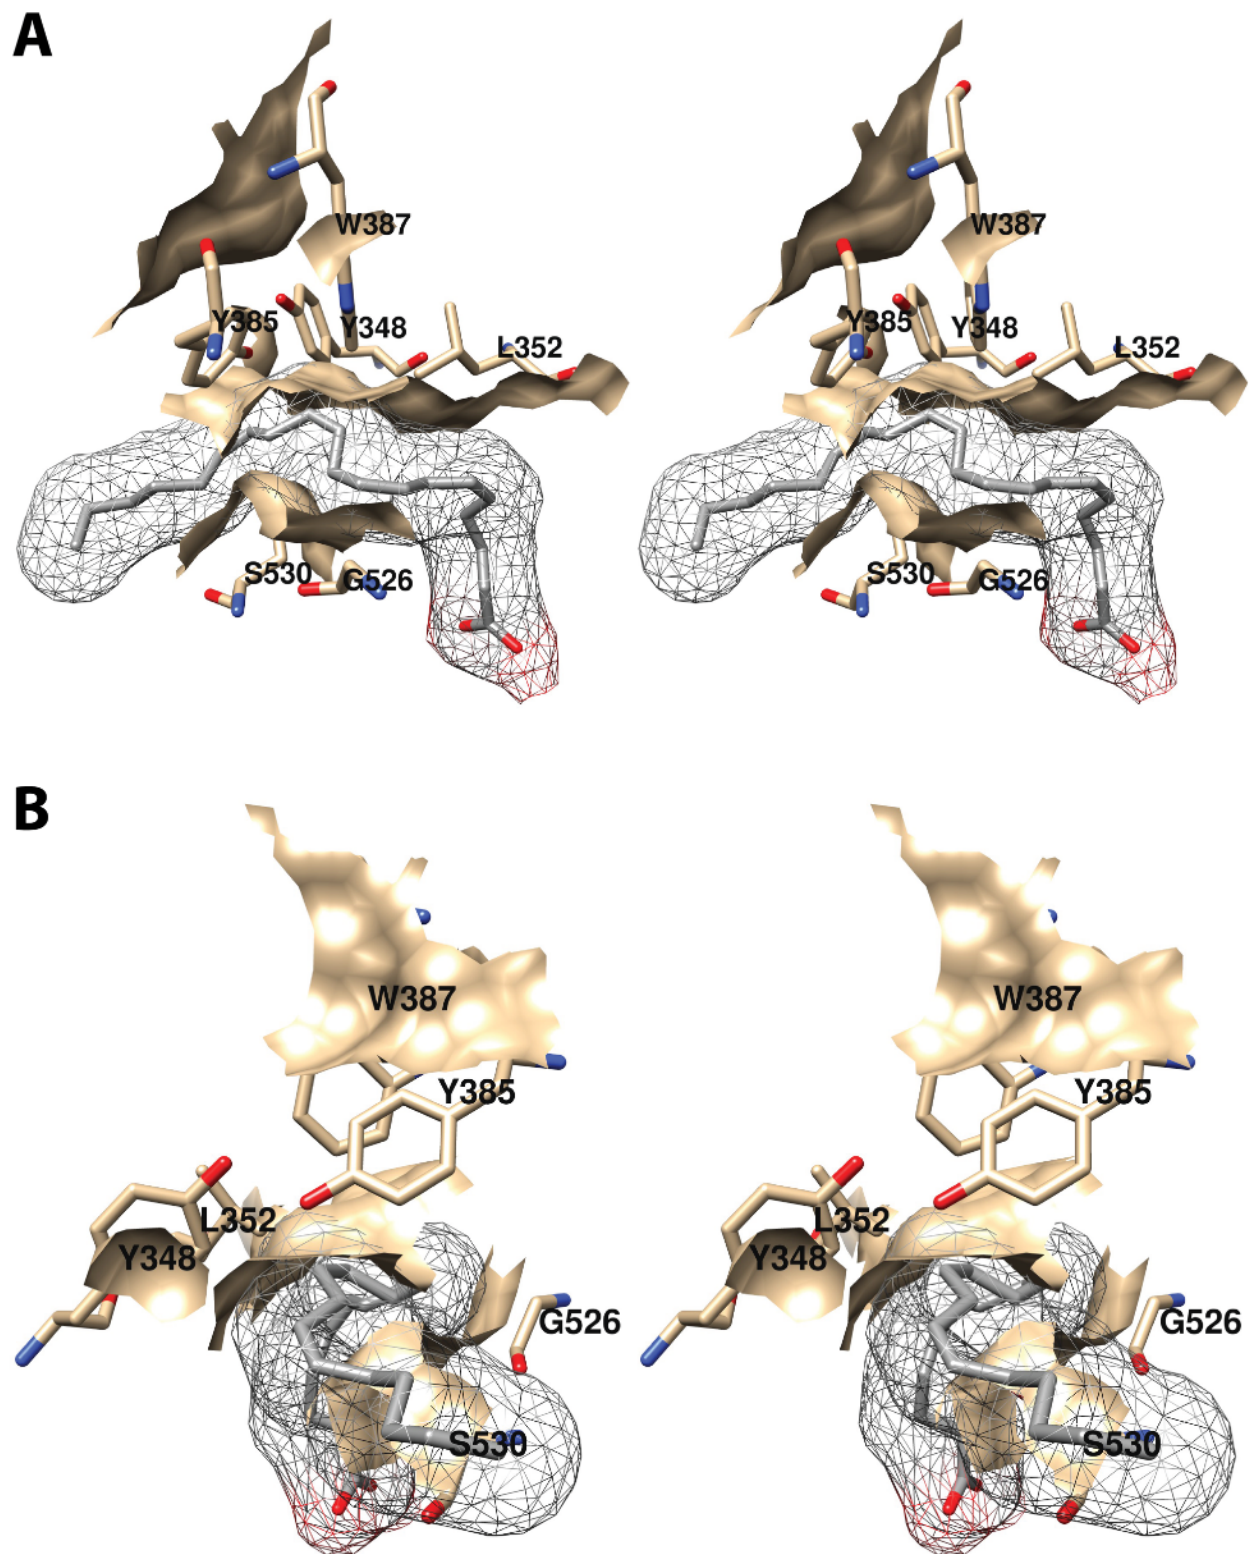

**Figure 7.** Cross-eyed stereo view of the central AA binding pocket as observed from the side (i.e., parallel to the plane of the membrane) (A) or looking along the axis of the pocket (B). AA is colored by element,



and its surface is shown as a mesh. Side chains of the residues comprising the pocket are displayed, and their surface is shown in solid tan. From PDB #1DIY.

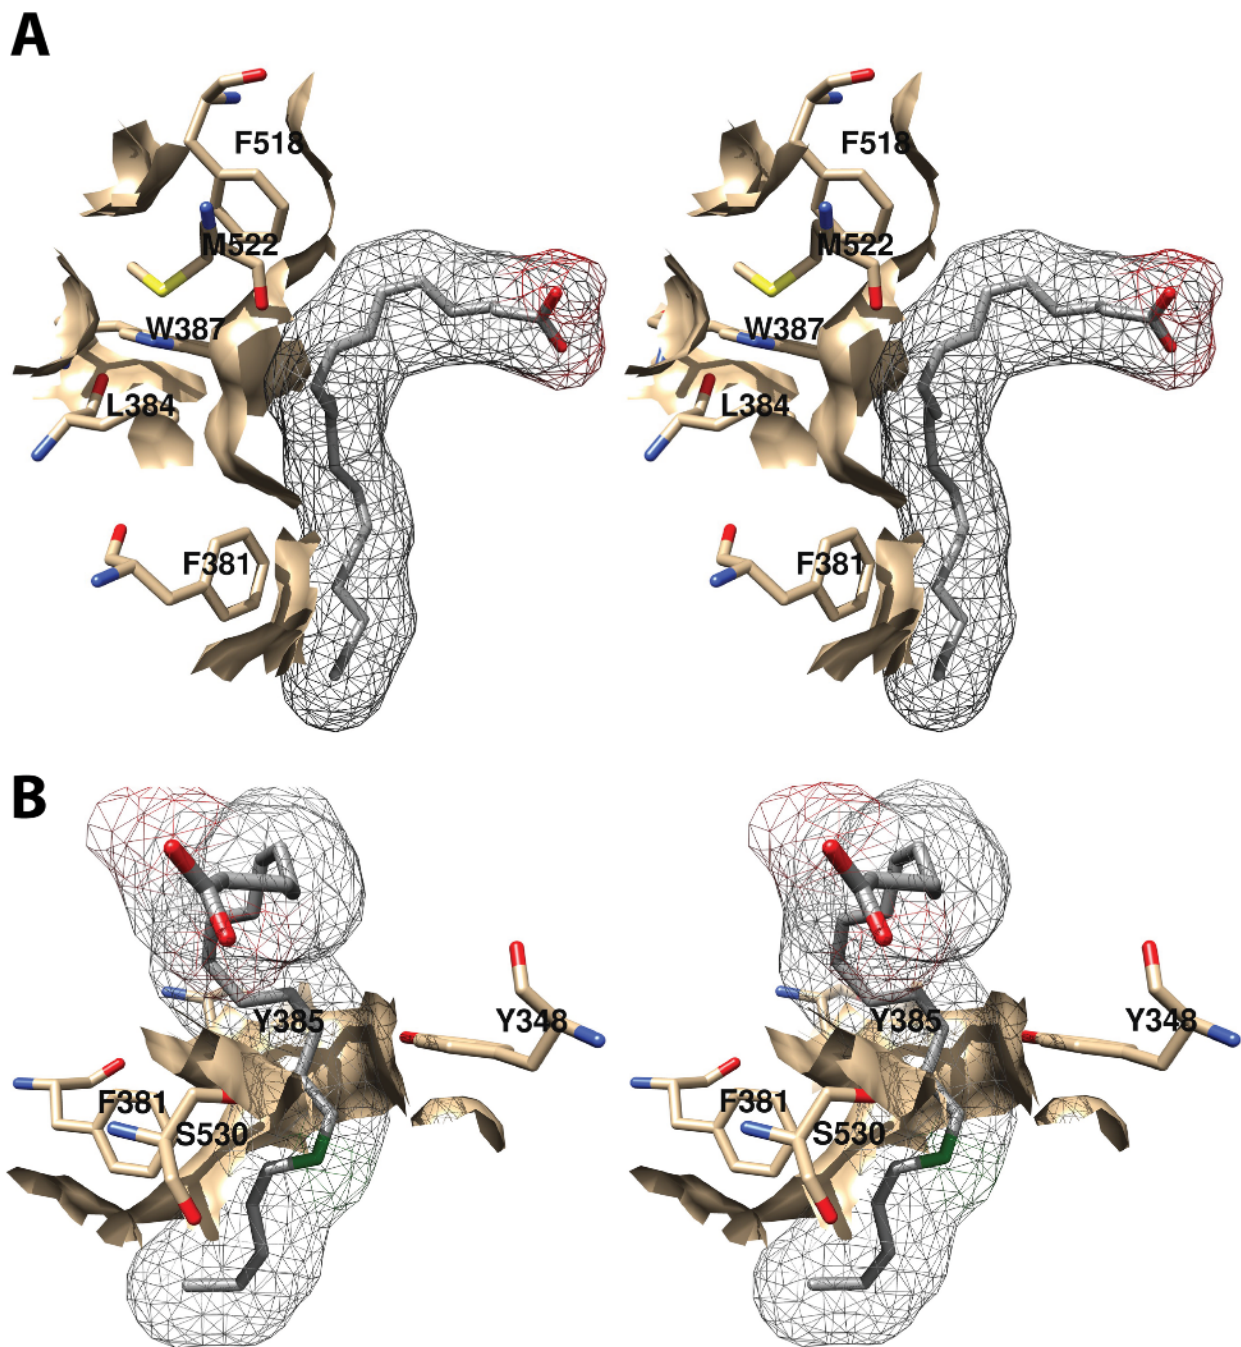

**Figure 8.** Cross-eyed stereo view of AA bound to the active site of COX-1. (A) A pocket formed by Phe-381, Leu-384, Trp-387, Phe-518, and Met-522 provides space for formation of the endoperoxide ring. (B) Tyr-348, Phe-381, Tyr-385, and Ser-530 surround carbon-15 of AA (green) dictating the orientation of oxygen addition at this site. AA is colored by element (with the exception of carbon-15 in B), and its surface is shown as a mesh. Side chains of the residues indicated are displayed, and their surface is shown in solid tan. From PDB #1DIY.

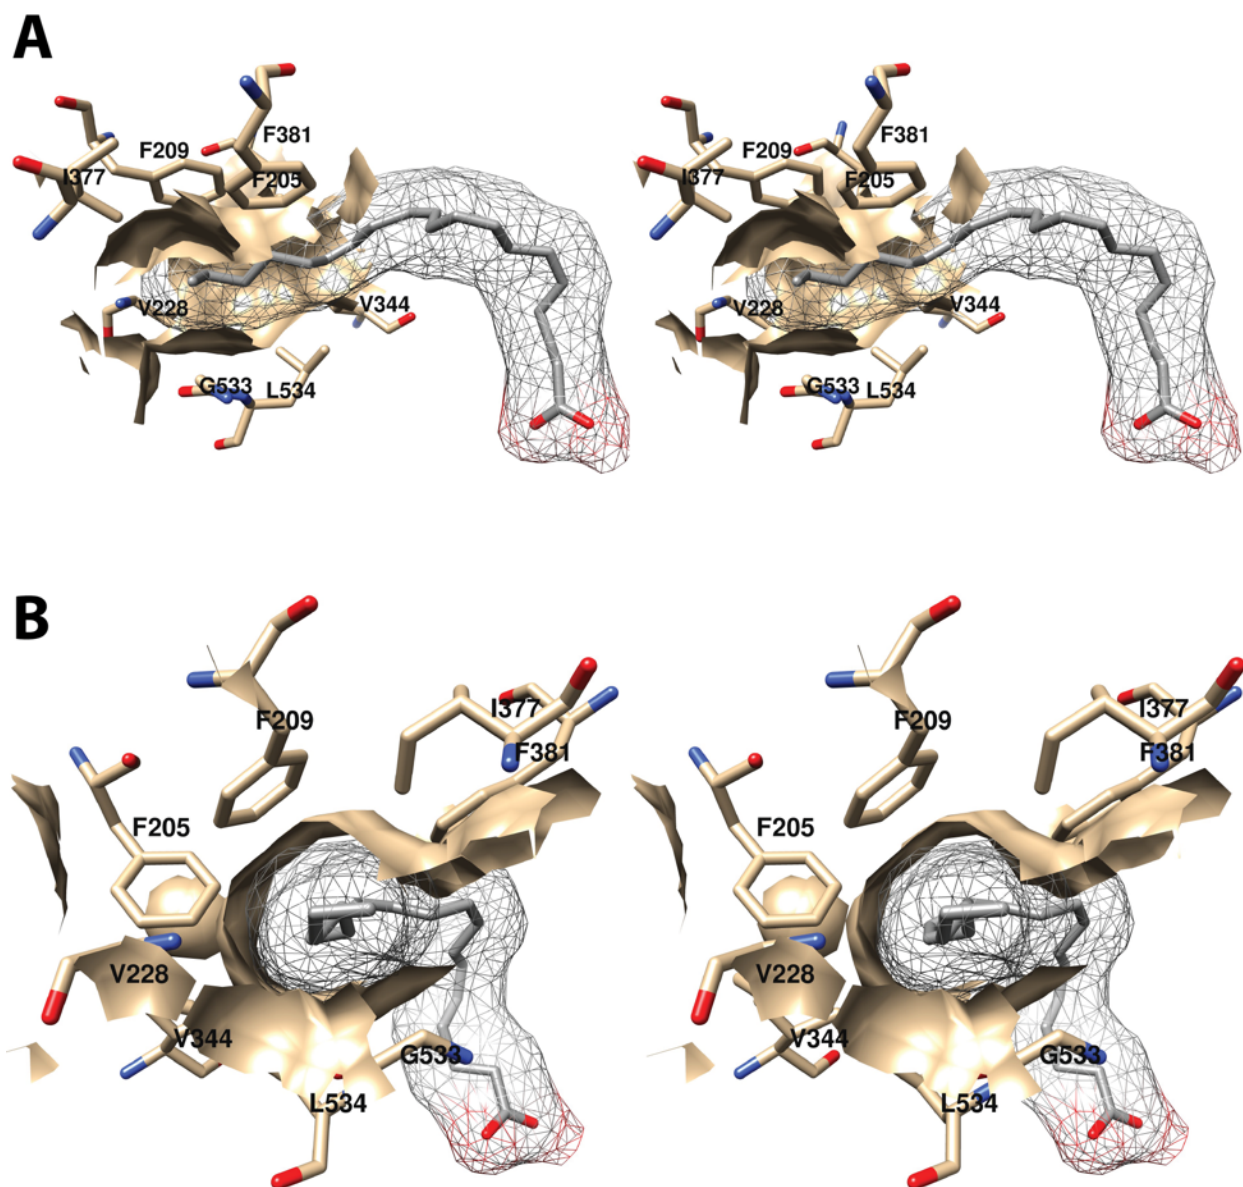

**Figure 9.** Cross-eyed stereo view of the distal AA binding pocket as observed from the side (i.e., parallel to the plane of the membrane) (A) or looking along the axis of the pocket (B). AA is colored by element, and its surface is shown as a mesh. Side chains of the residues comprising the pocket are displayed, and their surface is shown in solid tan. From PDB #1DIY.

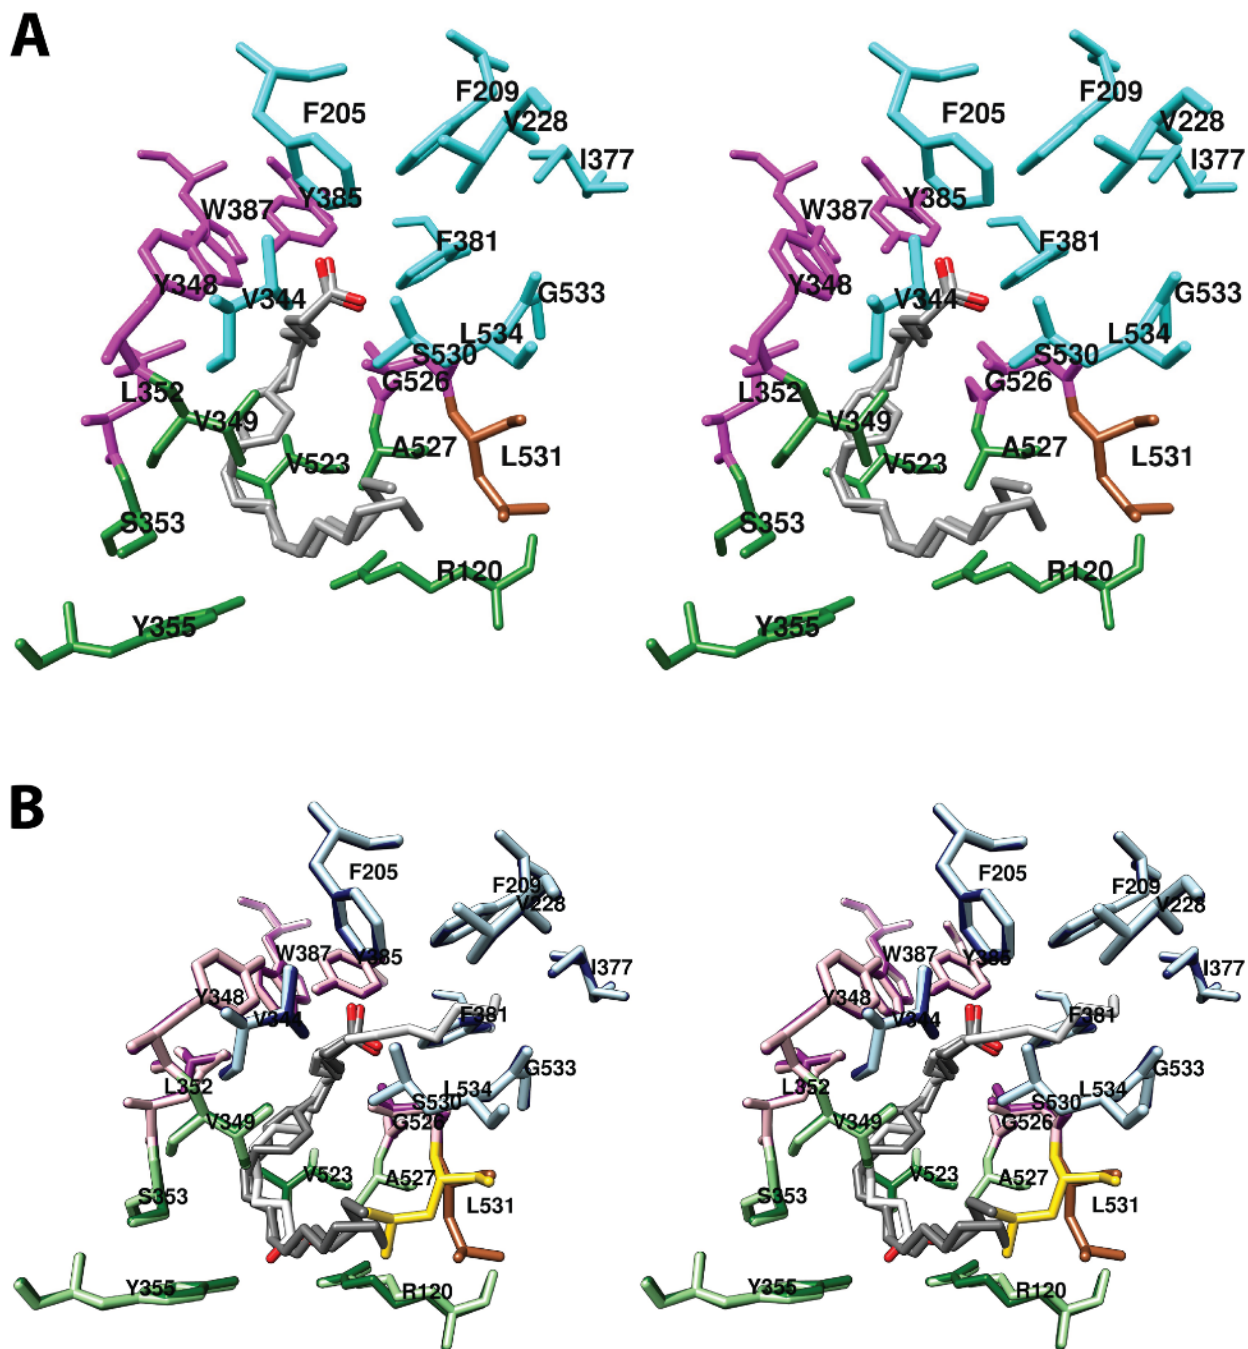

**Figure 10.** (A) Cross-eyed stereo view of the structure of AA (nonproductive conformation) bound in the cyclooxygenase active site of COX-2 and the side chains that make up the proximal binding pocket (green), the central binding pocket (magenta), and the distal binding pocket (cyan). Note that AA is observed in two slightly different conformations. (B) Wall-eyed stereo view of an overlay of the structures of the nonproductive (dark gray) and productive (light gray) conformations of AA bound in the cyclooxygenase active site. Residues in the surrounding binding pockets are colored similarly to those in (A) with the lighter and darker colors corresponding to the productive and nonproductive conformations, respectively. Also shown is the marked difference in the position of Leu-531 between the productive conformation (gold) and the nonproductive conformation (sienna). From PDB #3HS5. Figure 10. Cross-



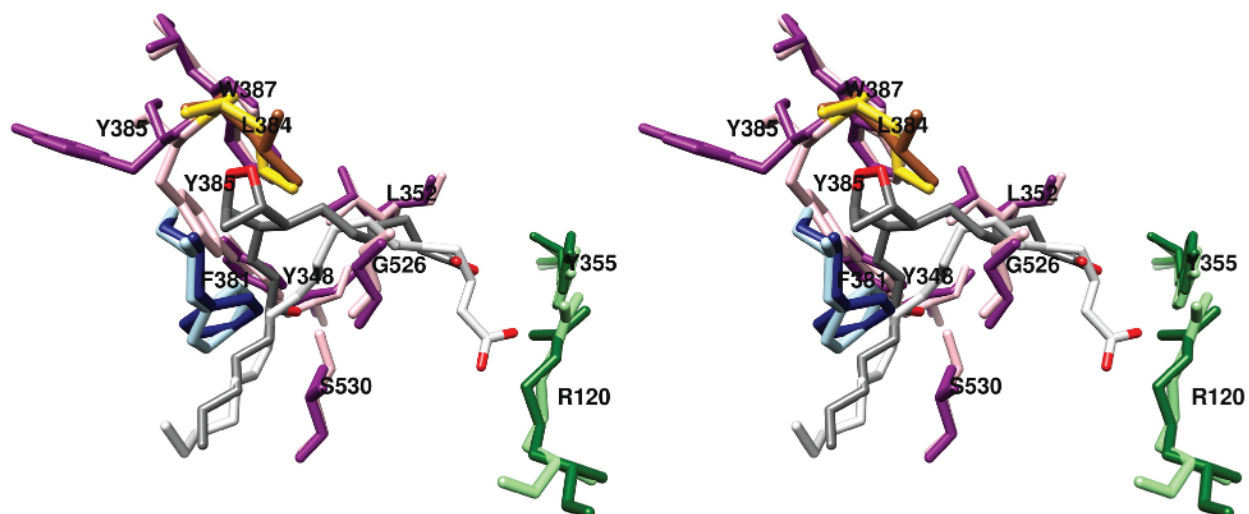

**Figure 11.** Wall-eyed stereo view of the structure of PGG<sub>2</sub>/H<sub>2</sub> overlaid with that of AA (productive conformation) bound in the active site of COX-2. Side chains that make up the central binding pocket are shown (light and dark magenta), as are Leu-384 (gold and sienna), proximal binding pocket residues Arg-120 and Tyr-355 (light and dark green), and distal binding pocket residue Phe-381 (dark and light blue). PGG<sub>2</sub> (dark gray) and AA (light gray) are colored by heteroatom. In the case of residue side chains, the darker and lighter colors denote positions in the complexes containing PGG<sub>2</sub>/H<sub>2</sub> and AA, respectively. The major shift in the position of Tyr-385 is readily apparent, as is the upward shift in the position of the carboxyl group of PGG<sub>2</sub> relative to that of AA. These displacements are enabled by the absence of heme and likely would not occur in the holoenzyme. From PDB #3HS5 (chain B) and #1DDX.

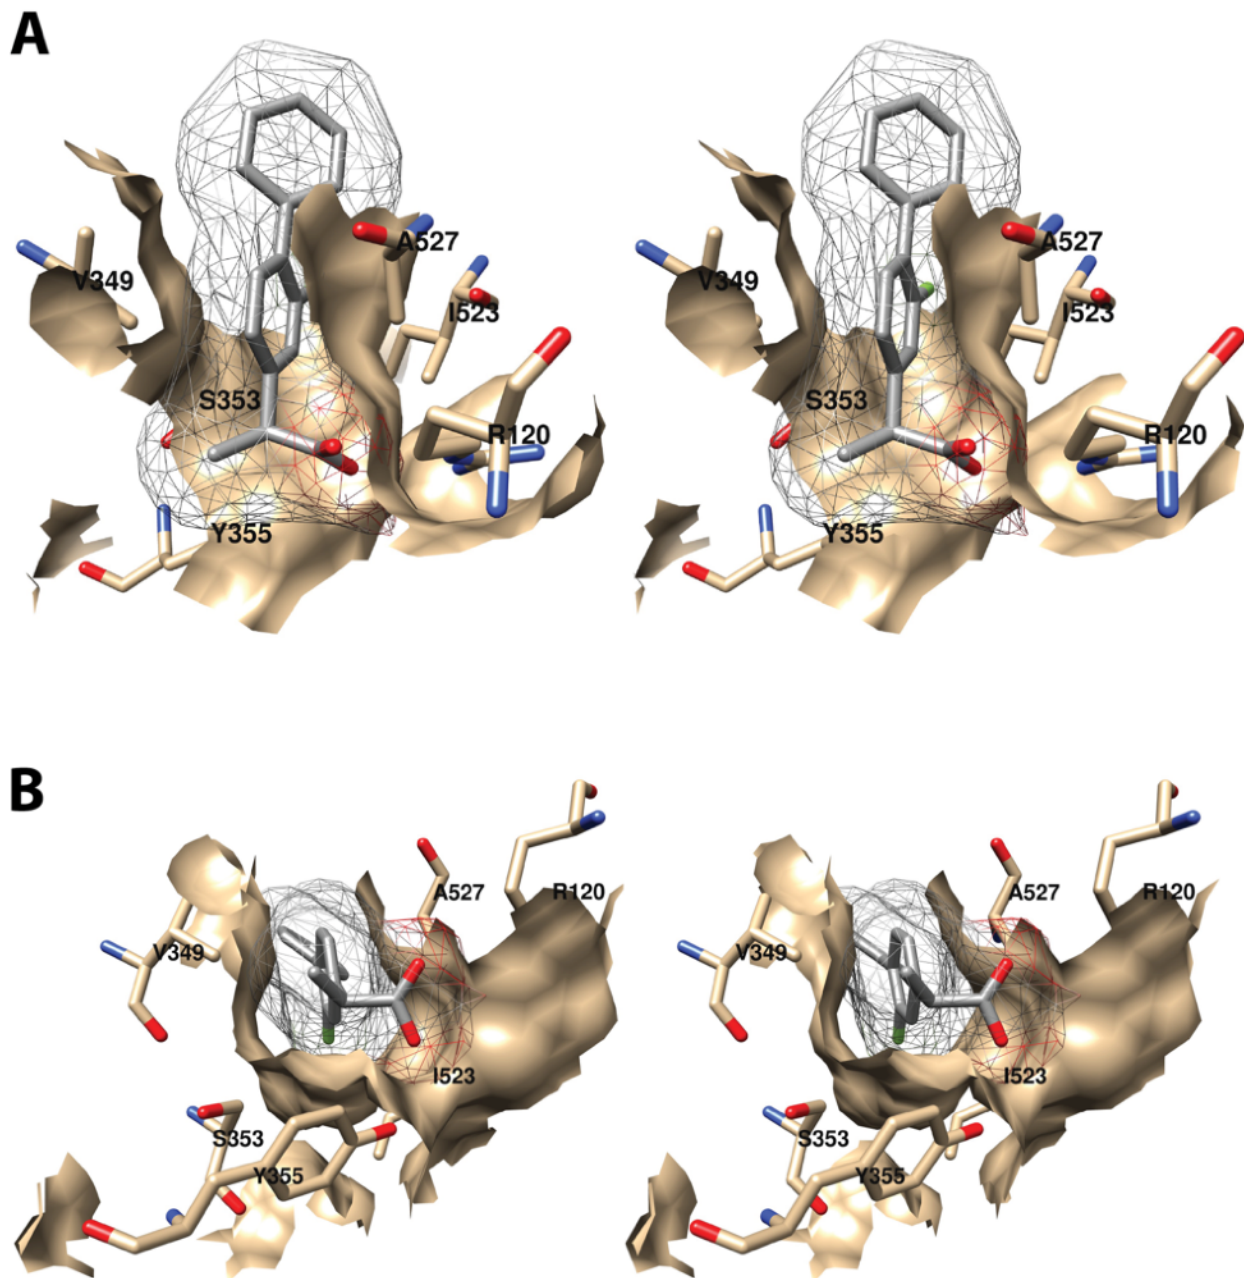

**Figure 12.** Cross-eyed stereo view of the interaction of the proximal inhibitor binding pocket with (*S*)-flurbiprofen as observed from the side (i.e., parallel to the plane of the membrane) (A) or looking upward from the membrane (B). (*S*)-Flurbiprofen is colored by element, and its surface is shown as a mesh. Side chains of the residues comprising the pocket are displayed, and their surface is shown in solid tan. From PDB #1EQH.

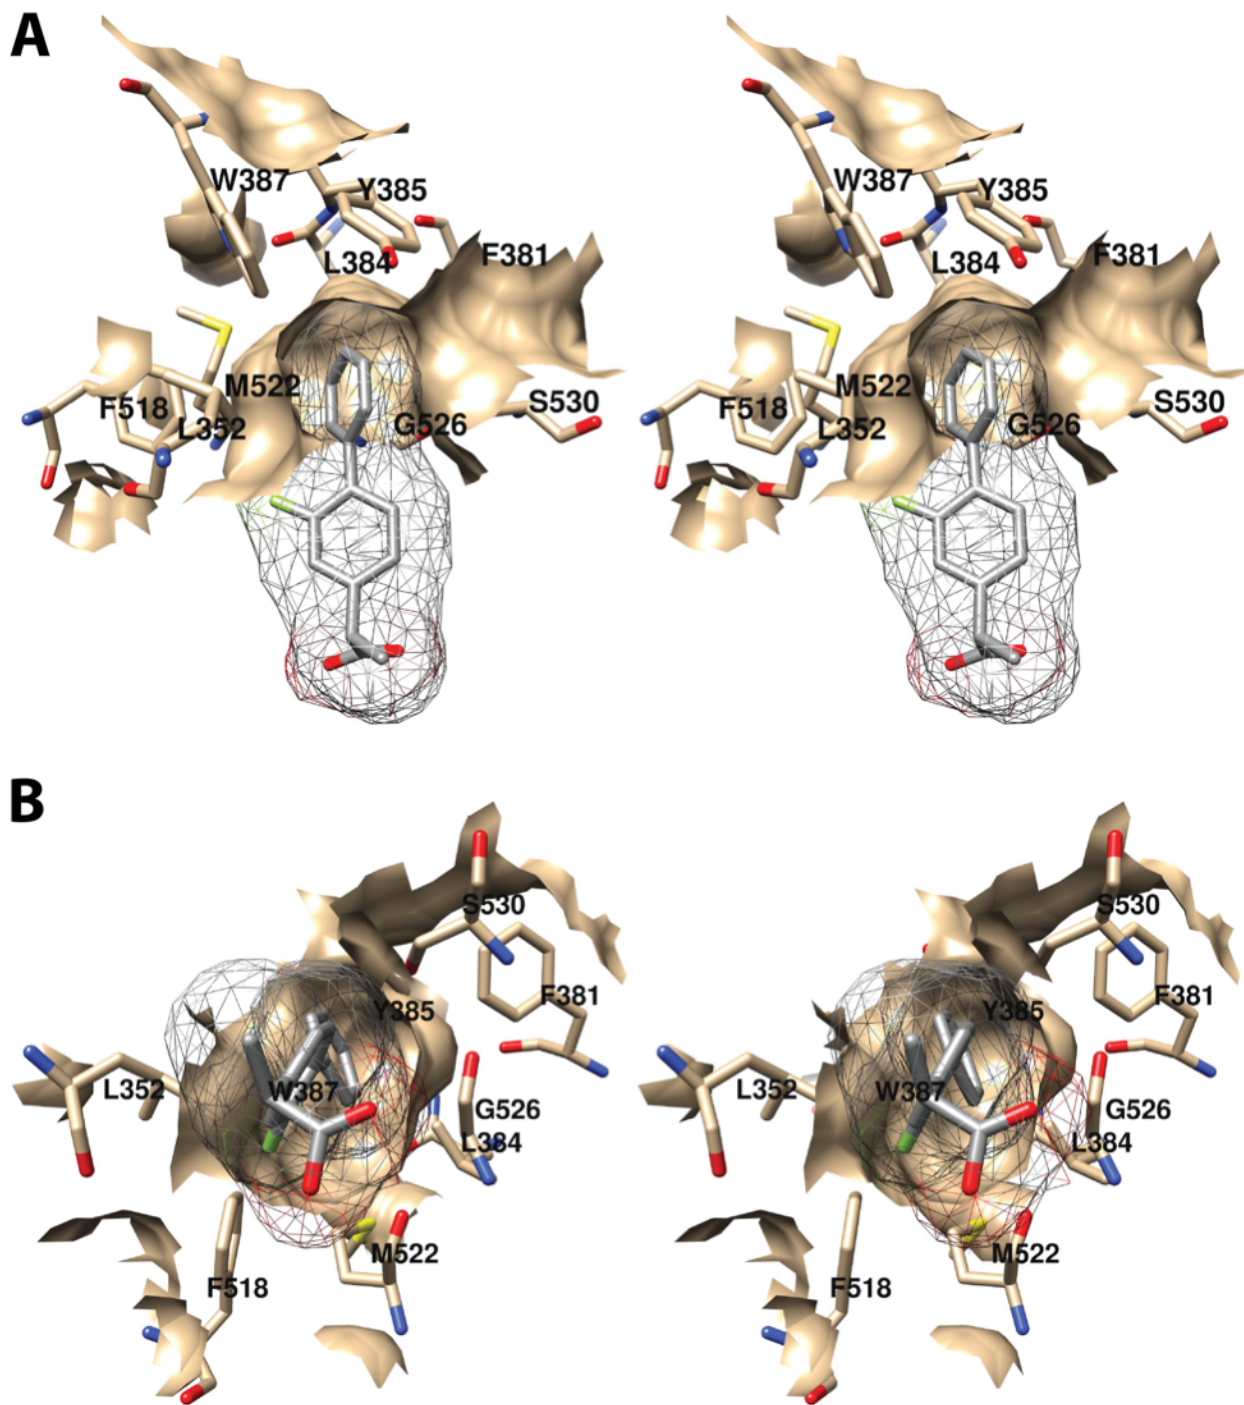

**Figure 13.** Wall-eyed stereo view of the interaction of the central inhibitor binding pocket with (*S*)-flurbiprofen as observed from the side (i.e., parallel to the plane of the membrane) (A) or looking upward from the membrane (B). (*S*)-Flurbiprofen is colored by element, and its surface is shown as a mesh. Side chains of the residues comprising the pocket are displayed, and their surface is shown in solid tan. From PDB #1EQH.

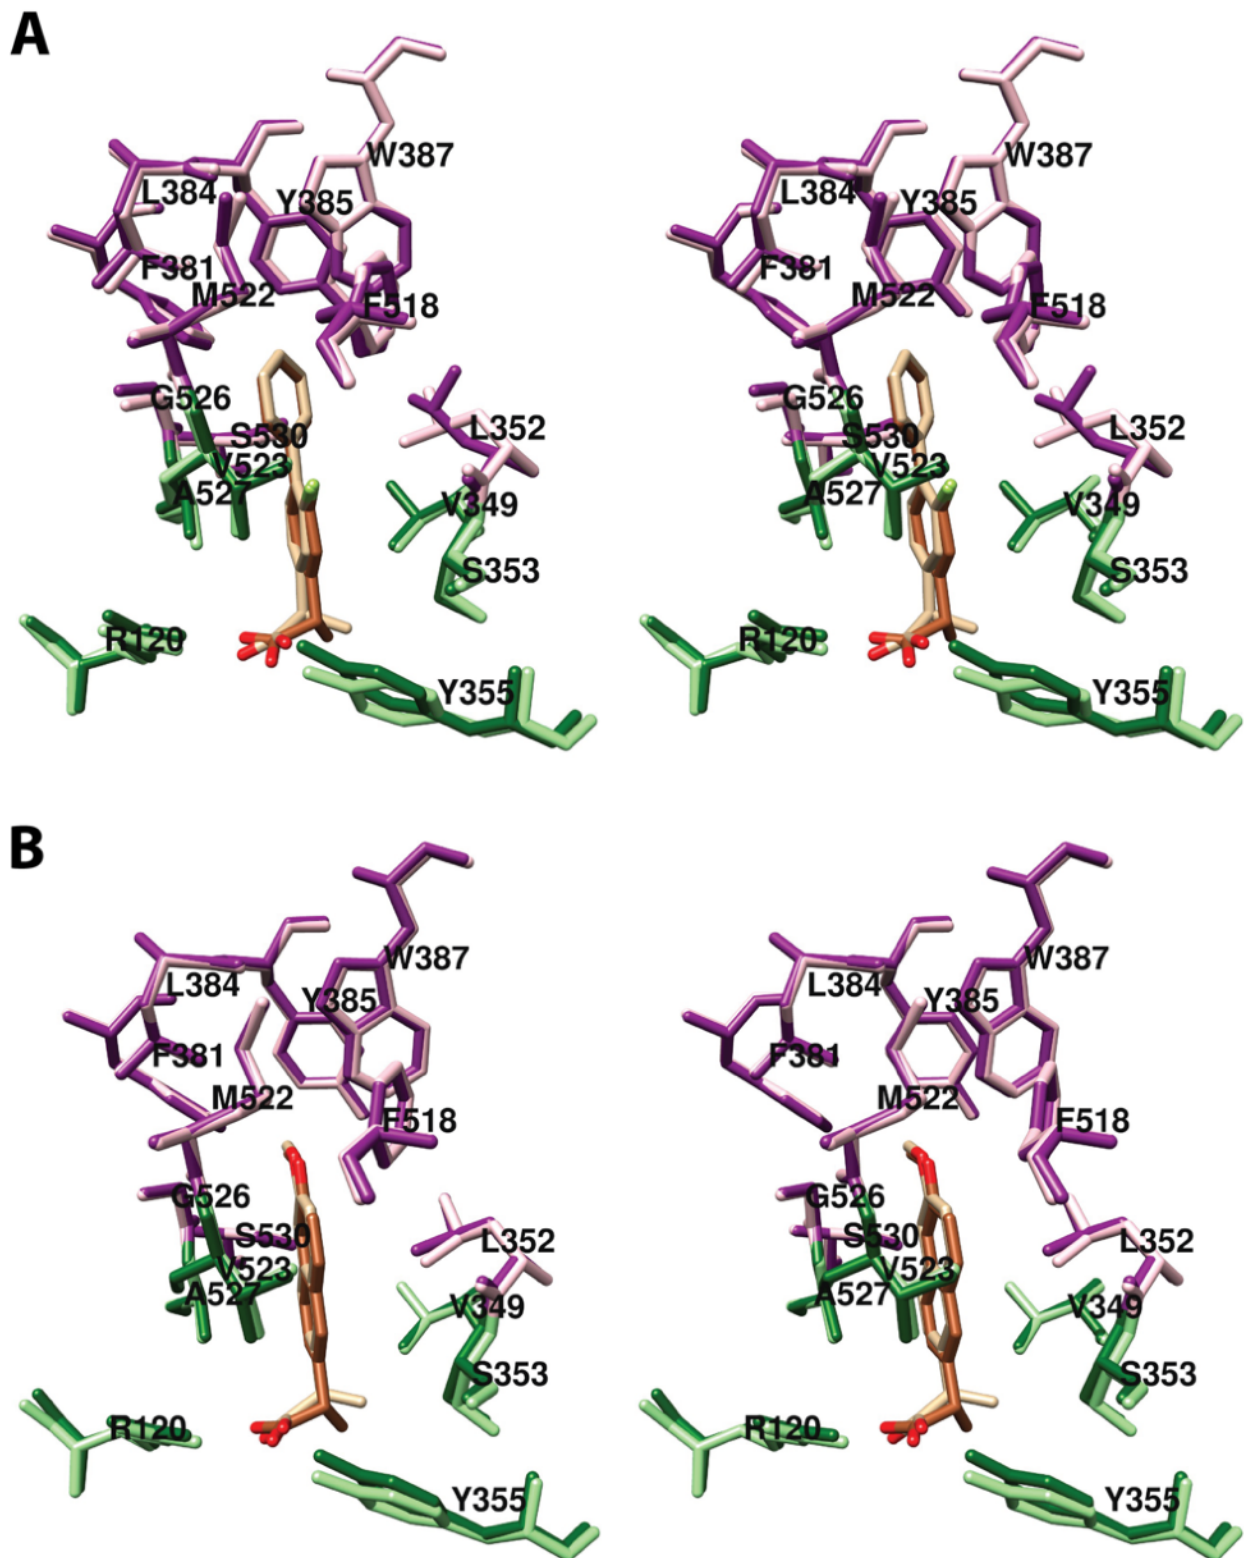

**Figure 14.** Cross-eyed stereo views of overlays of the structures of (A) (*R*)- and (*S*)-flurbiprofen and (B) (*R*)- and (*S*)-naproxen, bound in the cyclooxygenase active site of COX-2 and the side chains that make up the proximal binding pocket (light/dark green) and the central binding pocket (pink/magenta). In each case, structures related to the (*R*)-enantiomer (tan) are shown in the lighter color and those related to the



(S)-enantiomer (sienna) are shown in the darker color. From PDB #3PGH and #3RR3 (A) and PDB #3NT1 and #3Q7D (B).

**A**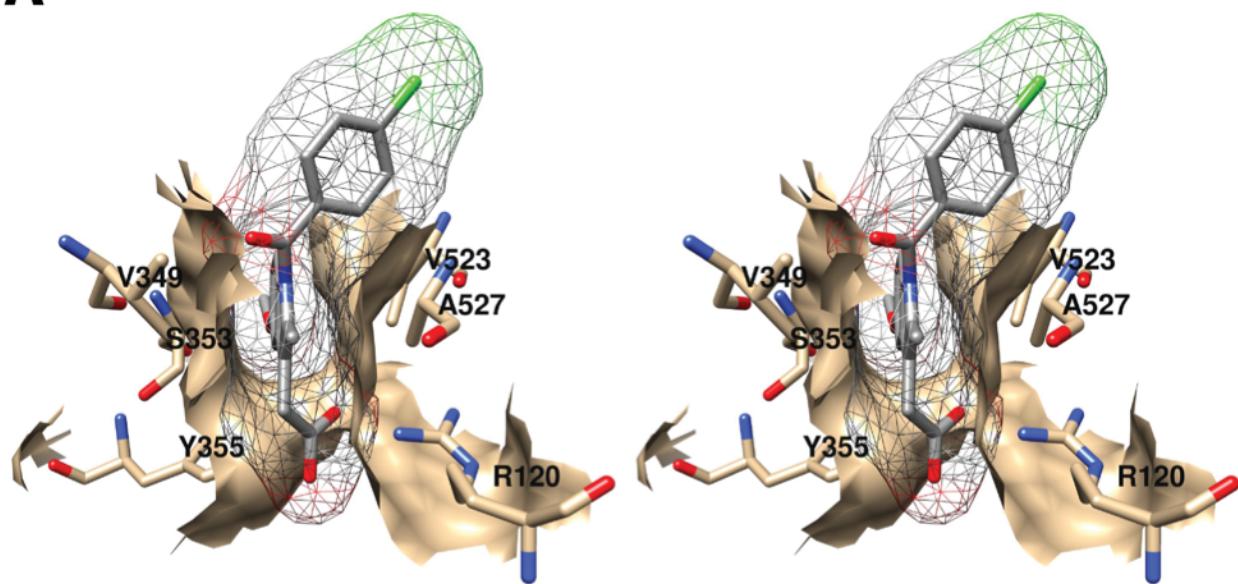**B**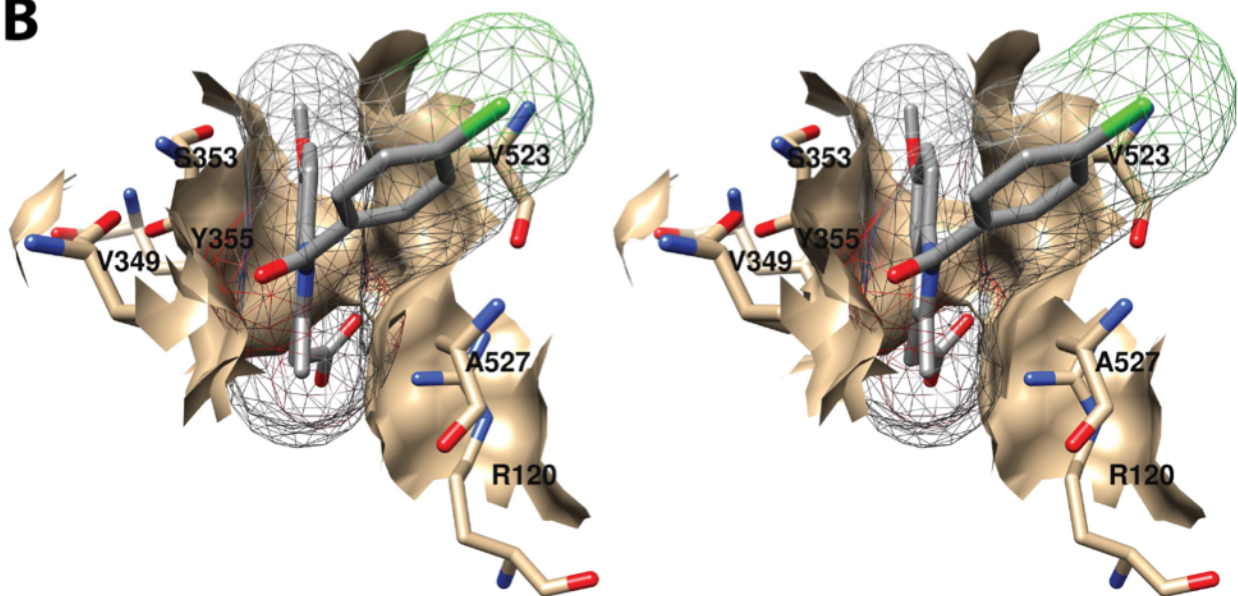

**Figure 15.** Cross-eyed stereo view of the interaction of the proximal inhibitor binding pocket with indomethacin as observed from the side (i.e., parallel to the plane of the membrane) (A) or from above (B). Indomethacin is colored by element, and its surface is shown as a mesh. Side chains of the residues comprising the pocket are displayed, and their surface is shown in solid tan. From PDB #4COX.

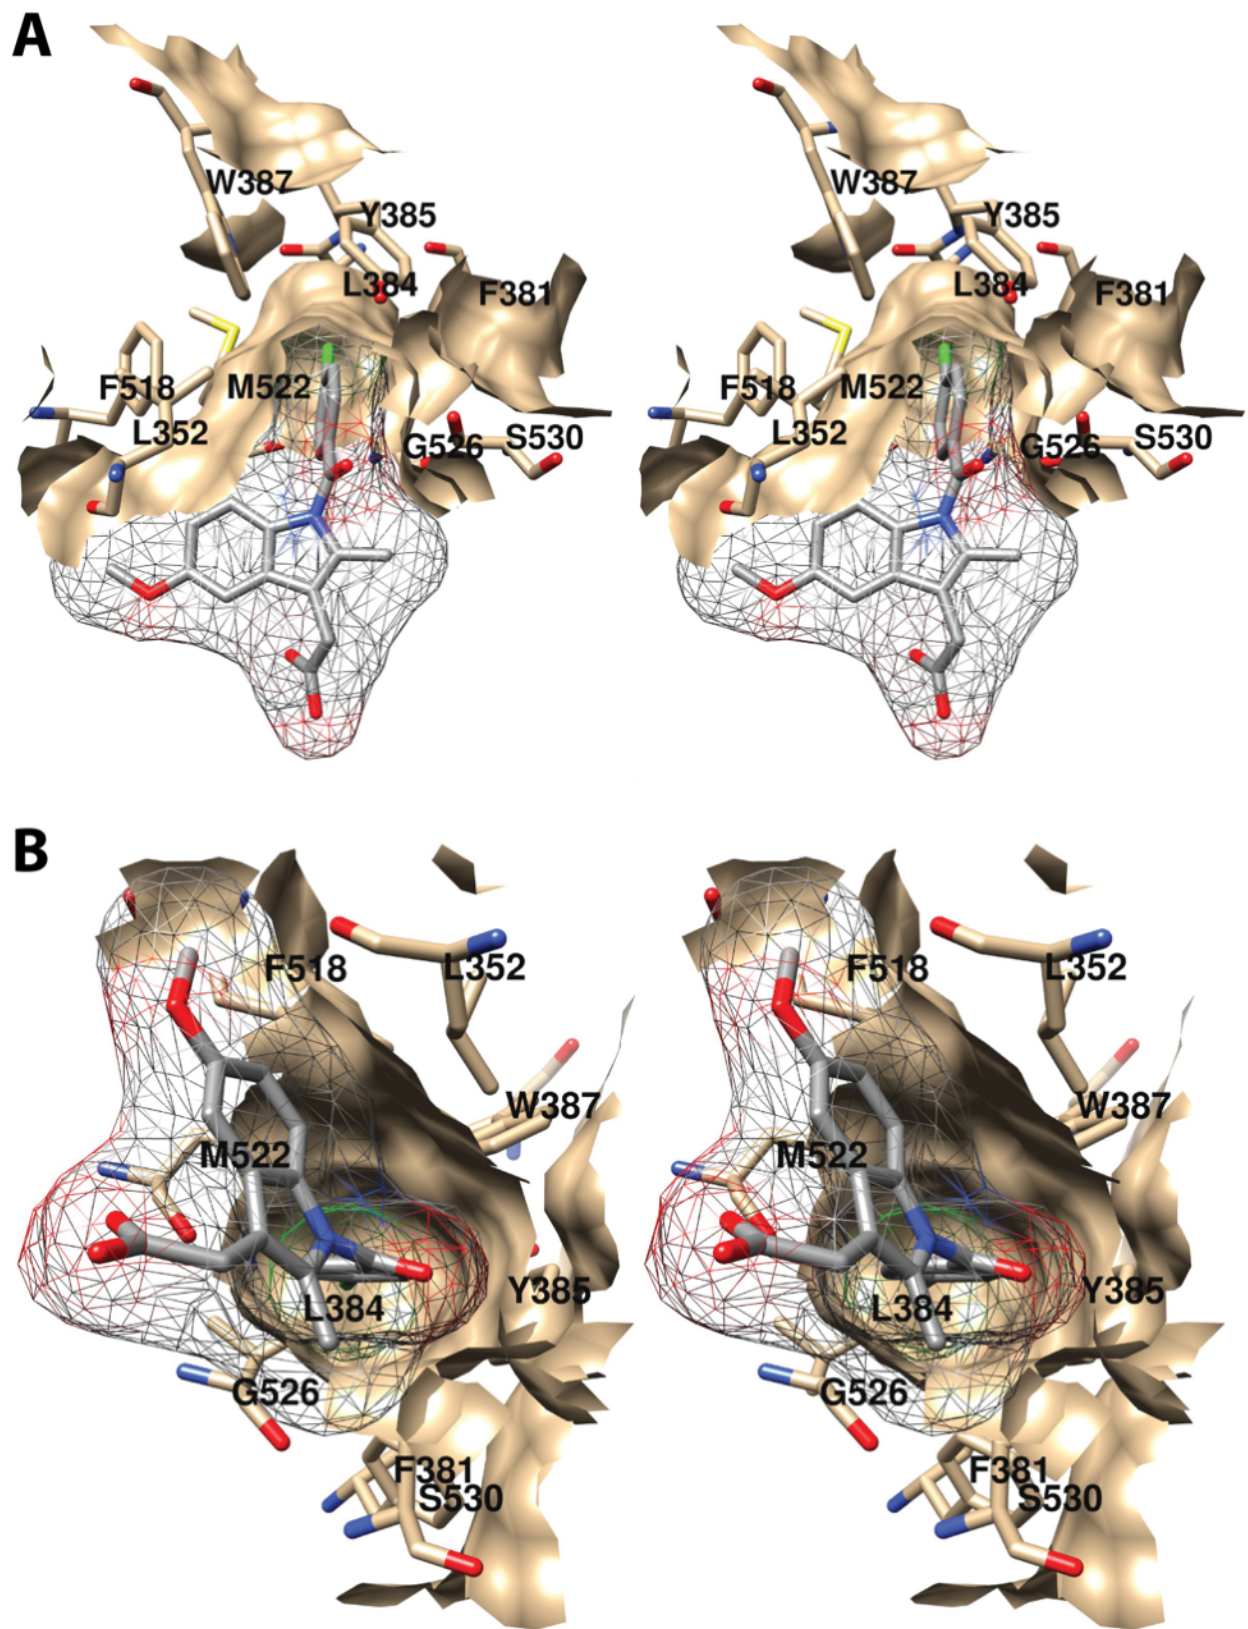

**Figure 16.** Cross-eyed stereo view of the interaction of the central inhibitor binding pocket with indomethacin as observed from the side (i.e., parallel to the plane of the membrane) (A) or looking

upward from the membrane (B). Indomethacin is colored by element, and its surface is shown as a mesh. Side chains of the residues comprising the pocket are displayed, and their surface is shown in solid tan. From PDB #4COX.



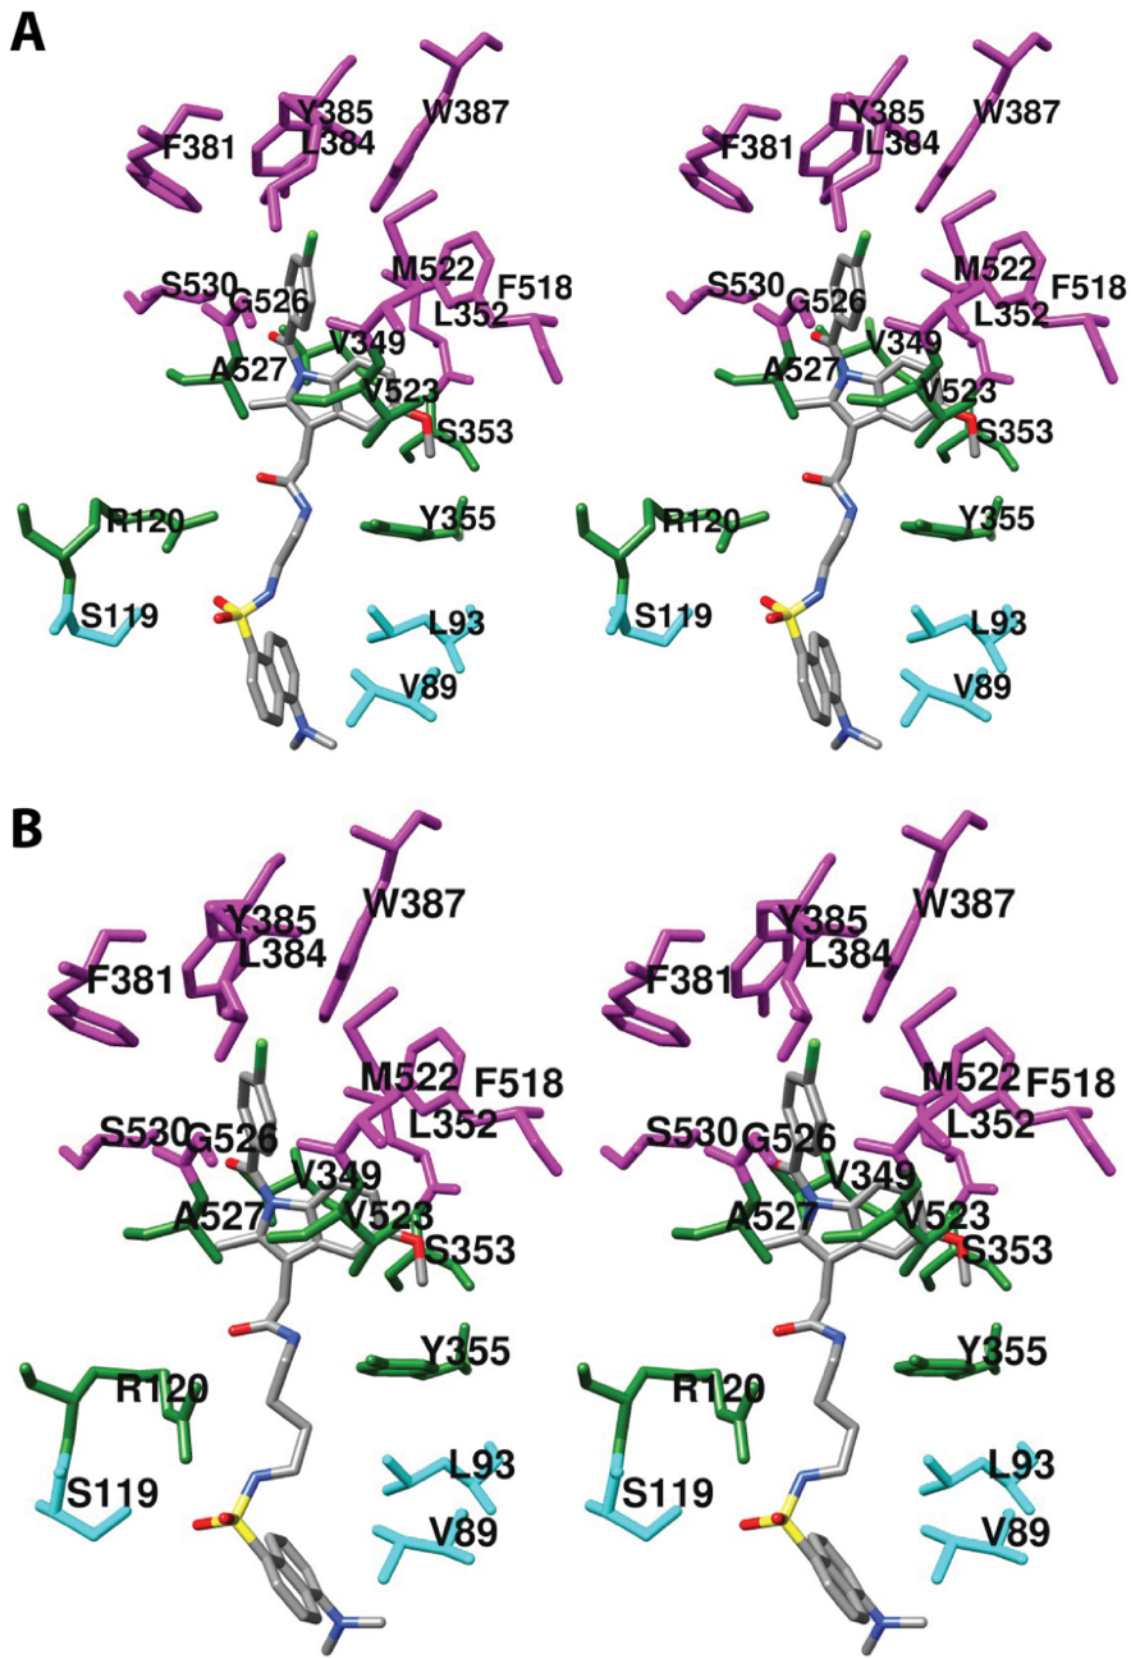

**Figure 17.** Cross-eyed stereo views of the structure of (A) indomethacin-dansyl conjugate 1 and (B)

indomethacin-dansyl conjugate 2 bound in the cyclooxygenase active site of COX-2. The side chains that make up the proximal binding pocket (green), the central binding pocket (magenta), and membrane-binding domain residues that interact with the dansyl moiety (cyan) are shown. From PDB #6BL4 (A) and #6BL3 (B).

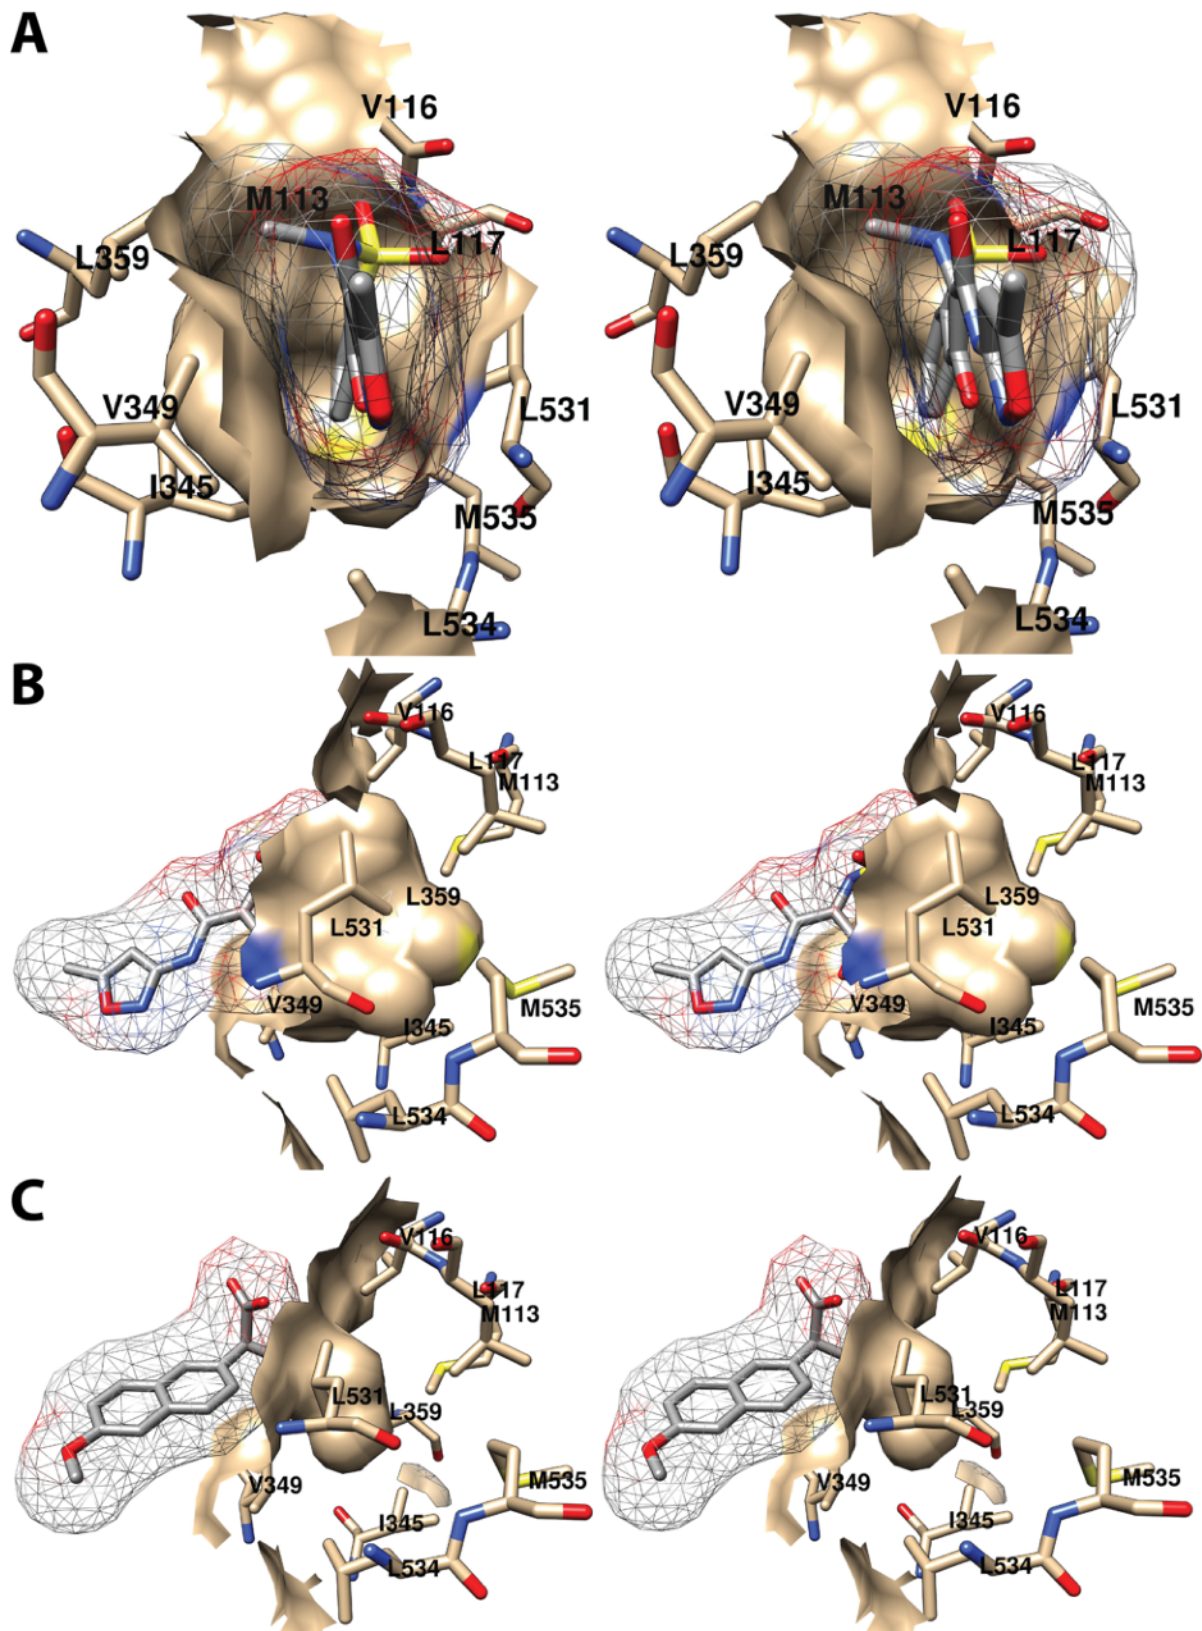

**Figure 19.** (A) Cross-eyed stereo view of the interaction of the oxycam binding pocket with isoxicam as observed from the side (i.e., parallel to the plane of the membrane), and comparison of the size of the

oxicam binding pocket (B) with the comparable region in the structure of COX-2 complexed to naproxen (C). The difference in the position of Leu-531 is clearly visible, as is the marked difference in the size of the pockets between the two complexes. Isoxicam and naproxen are colored by element, and their surface is shown as a mesh. Side chains of the residues comprising the pocket are displayed, and their surface is shown in solid tan. From PDB #4M10 and #3NT1.



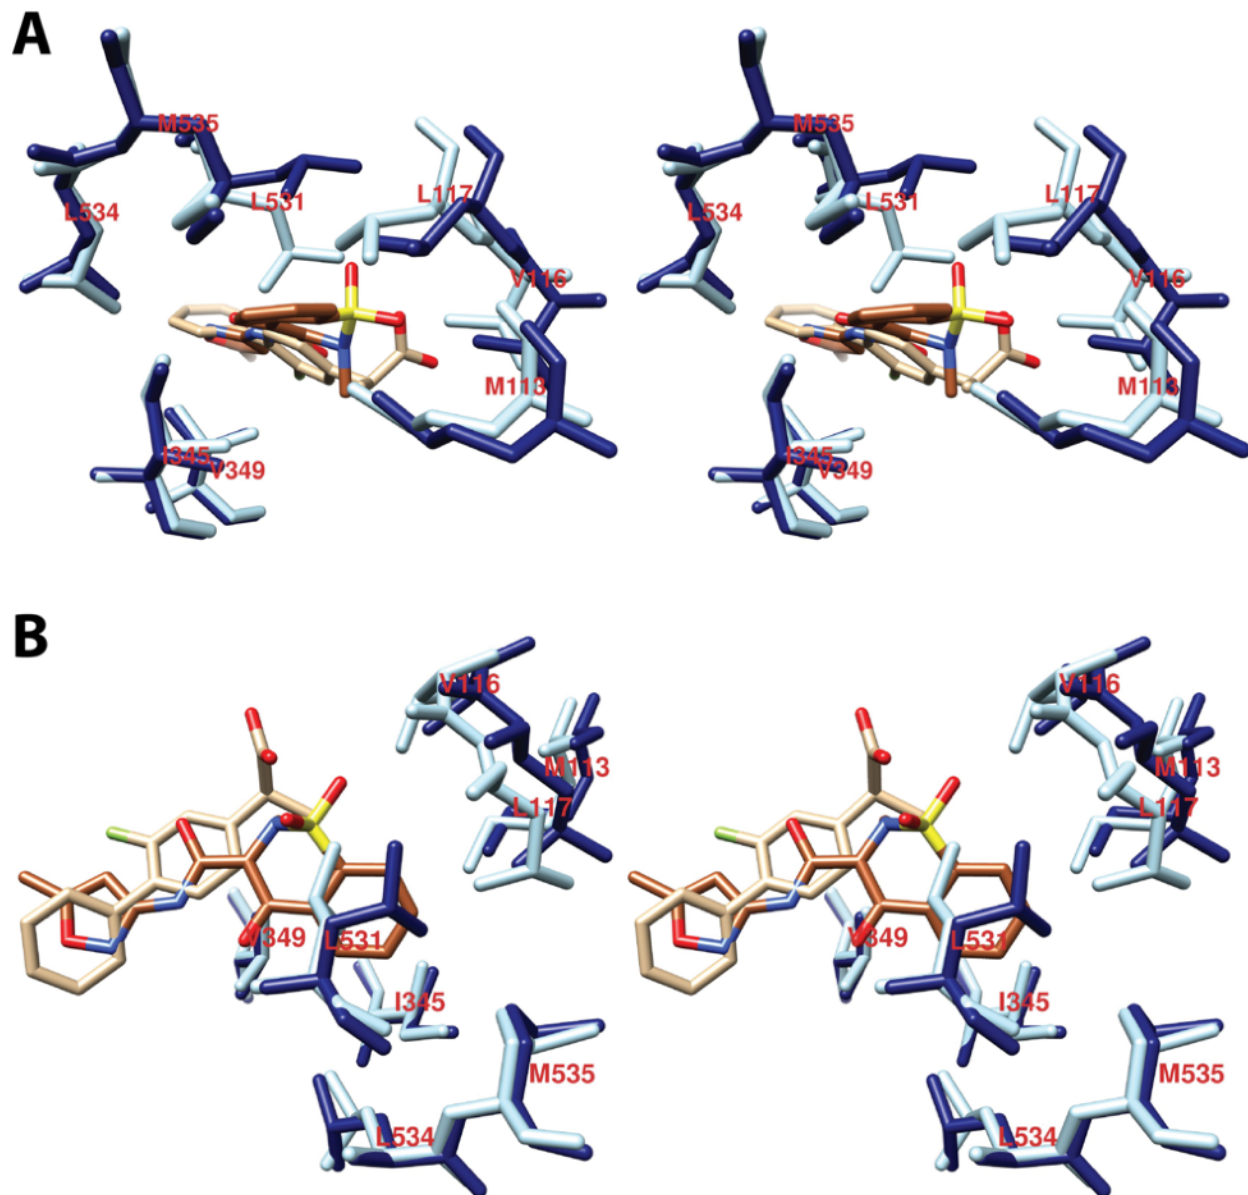

**Figure 19.** (A) and (B) Cross-eyed stereo views of the structure of isoxicam overlaid with that of (*S*)-flurbiprofen bound in the COX-2 active site along with the residues that form the oxicam pocket. Isoxicam is shown in sienna, and the associated amino acid residues are in dark blue. (*S*)-Flurbiprofen is in tan, and the associated amino acids are in light blue. Note the large difference in the conformation of Leu-531 between the two structures. This rotation is necessary to provide access to the oxicam pocket. Note also the difference in the positions of Met-113, Val-116, and Leu-117 that results from the movement of helix D. From PDB #4M10 and #3PGH.

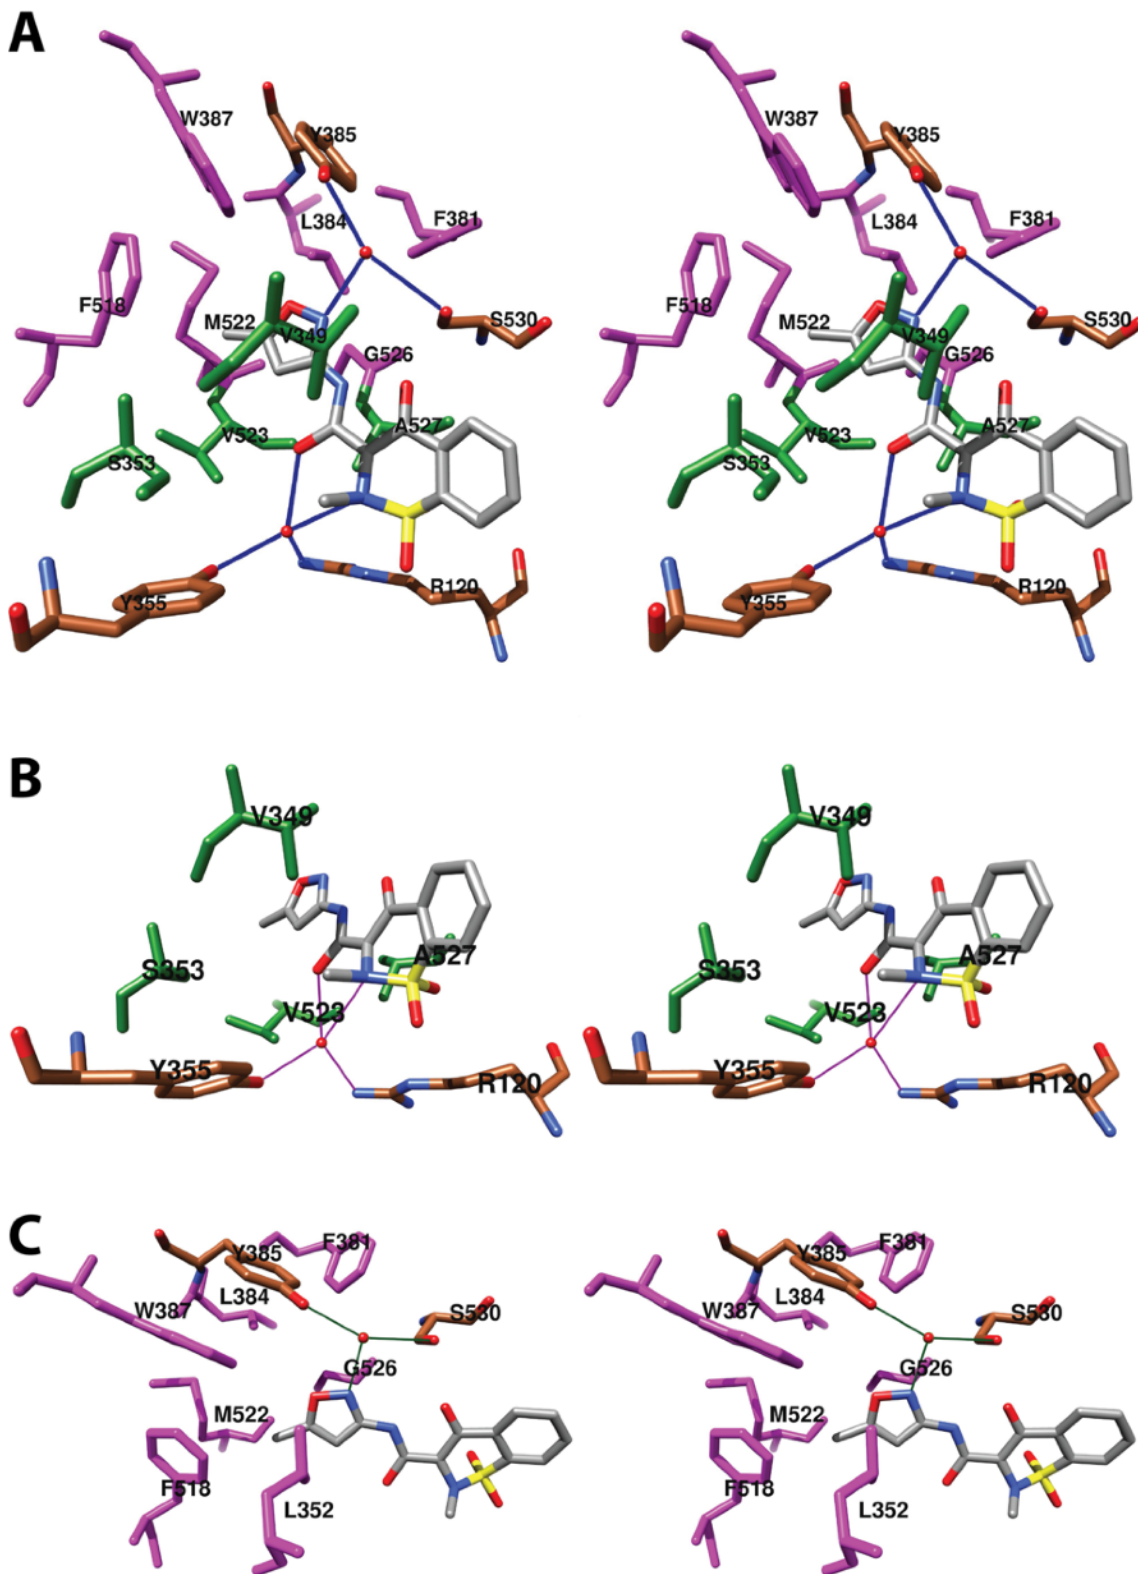

**Figure 20.** Cross-eyed stereo view of isoxicam bound in the cyclooxygenase active site of COX-2 and the hydrogen bonded water molecules through which the inhibitor establishes polar contacts with the side chains of residues in the proximal binding pocket (A & C) and the central binding pocket (B & C). Side chains are colored in green (proximal

binding pocket) or magenta (central binding pocket) with the exception of Arg-120, Tyr-355, Tyr-385, and Ser-530, which are colored by heteroatom on a sienna background. Isoxicam is colored by atom. The coordinated water molecule is shown as a red sphere. From PDB #4M10

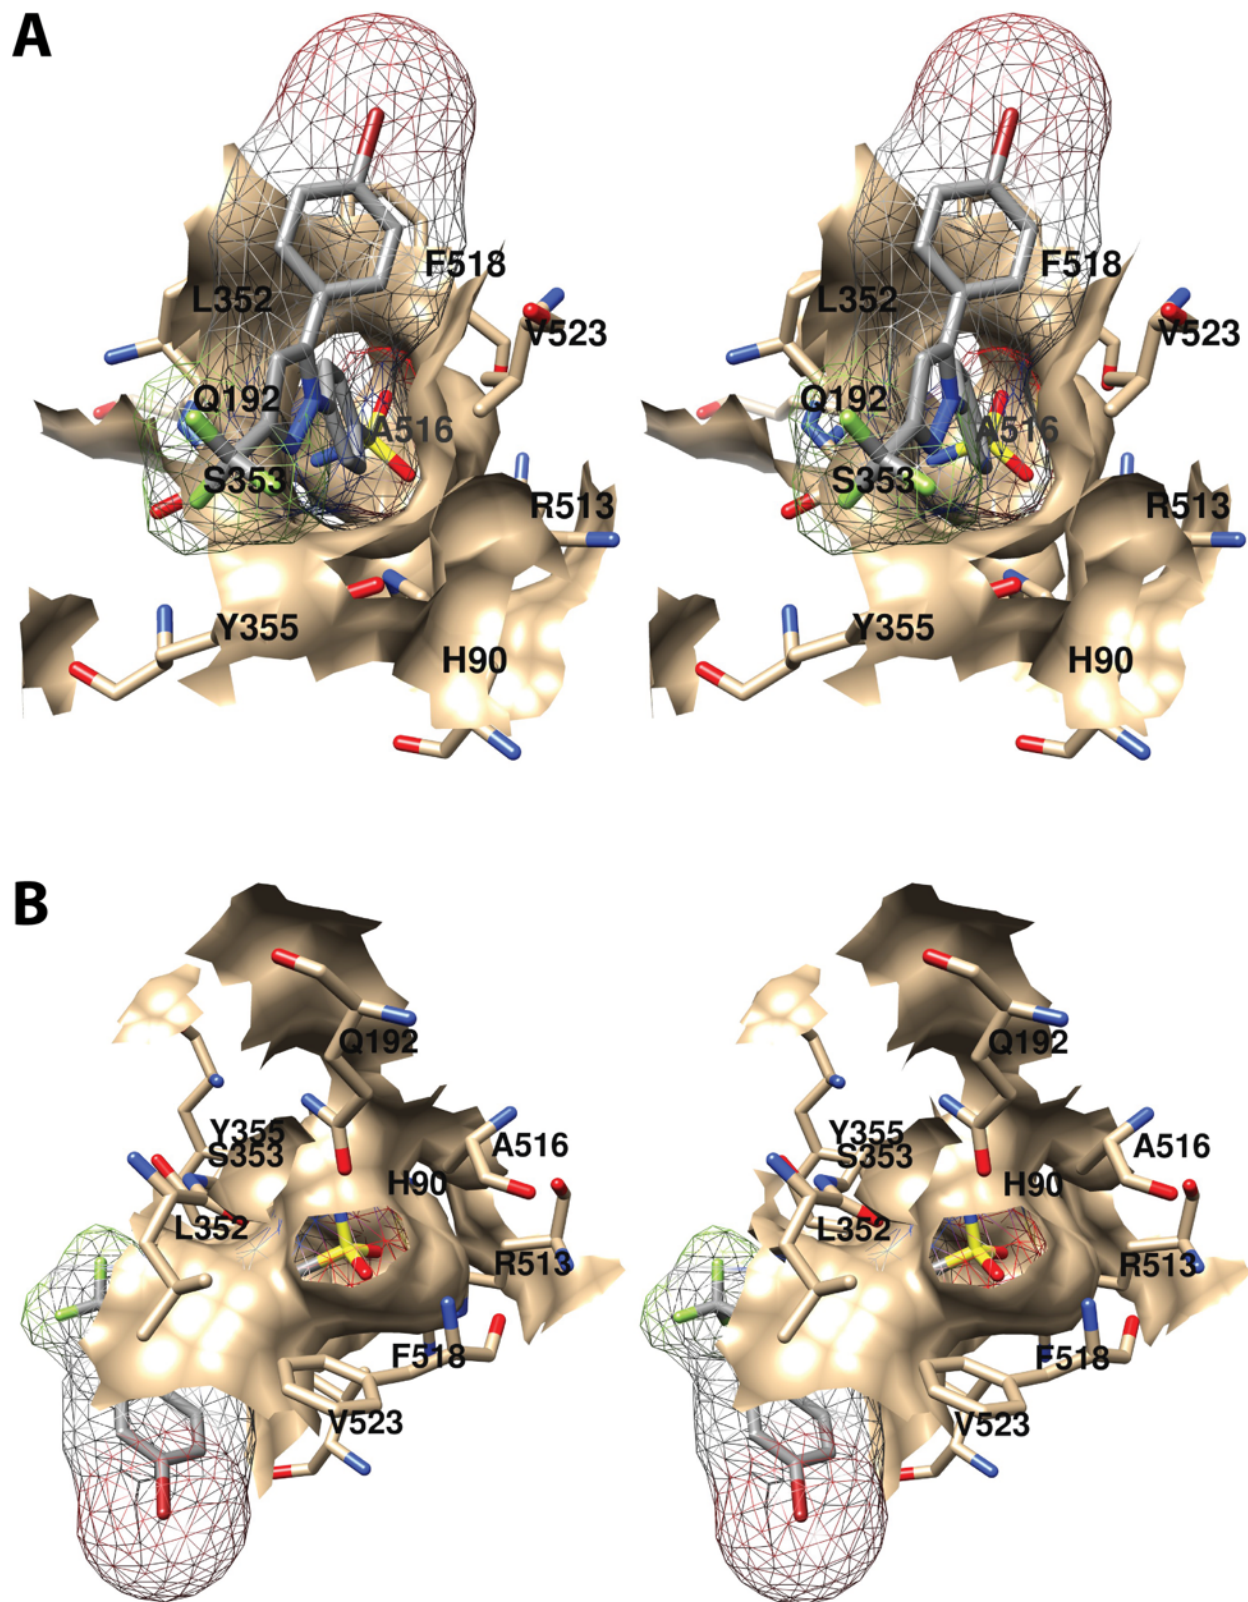

**Figure 21.** Cross-eyed stereo view of the interaction of the COX-2 side pocket with the phenylsulfonamide group of SC-558 as seen from two different views. SC-558 is colored by element, and

its surface is shown as a mesh. Side chains of the residues comprising the pocket are displayed, and their surface is shown in solid tan. In (B), the phenylsulfonamide group of SC-558 is completely surrounded by the pocket, so that only the sulfonamide can be seen. From PDB #6COX.



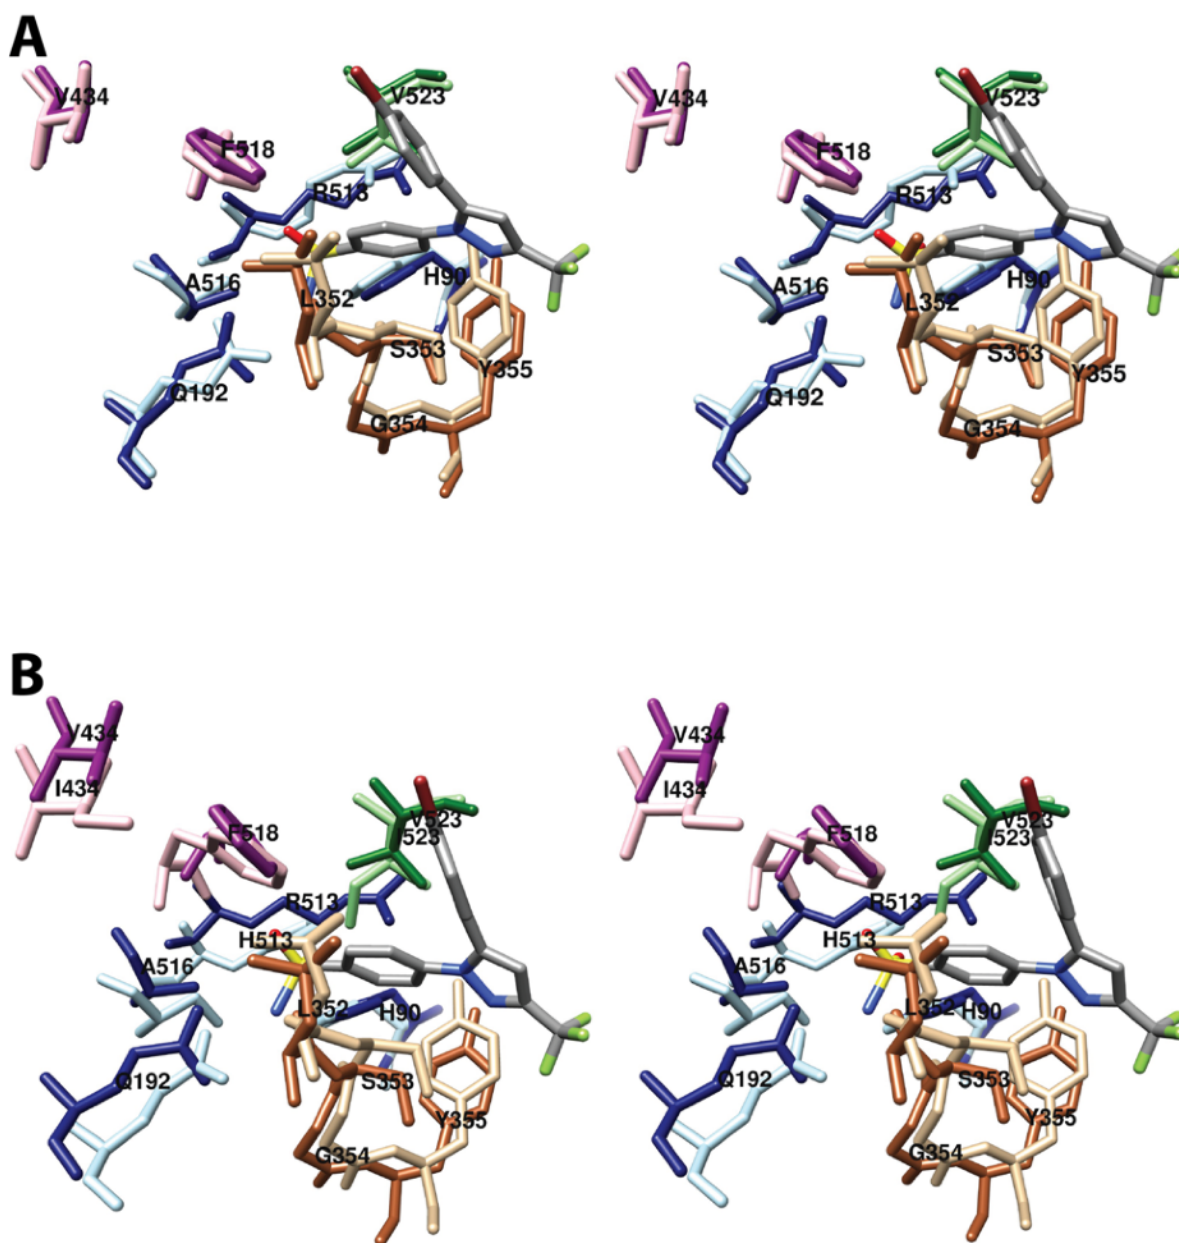

**Figure 22.** (A) Cross-eyed stereo view of the structure of SC-558 bound in the cyclooxygenase active site of COX-2 highlighting residues involved in side pocket formation and interactions. Overlaid are the same residues as observed in the structure of (*S*)-flurbiprofen bound in the cyclooxygenase active site of COX-2. Highlighted are Phe-518, which packs against Val-434 (pink/magenta) to open the side pocket, residues 352-355 (tan/sienna), which move to enlarge the side pocket upon diarylheterocycle binding, Val-523 (light/dark green), which is Ile-523 in COX-1, and other side pocket residues (light/navy blue). In each case, the darker colors correspond to residues in the SC-558-COX-2 structure whereas the lighter colors correspond to the (*S*)-flurbiprofen-COX-2 structure. (B) Same as (A) except that the structure of the SC-558-COX-2 complex (dark colors) is overlaid with the corresponding residues from the structure of (*S*)-flurbiprofen bound in the cyclooxygenase active site of COX-1 (light colors). Note the three key residues at positions, 434, 513, and 523 that are different between the two isoforms. In particular, Ile-523

in COX-1 encroaches on the side pocket, and Ile-434 in COX-1 prevents the movement of Phe-518 that provides access into the pocket. From PDB #6COX, #1EQH, and #3PGH.

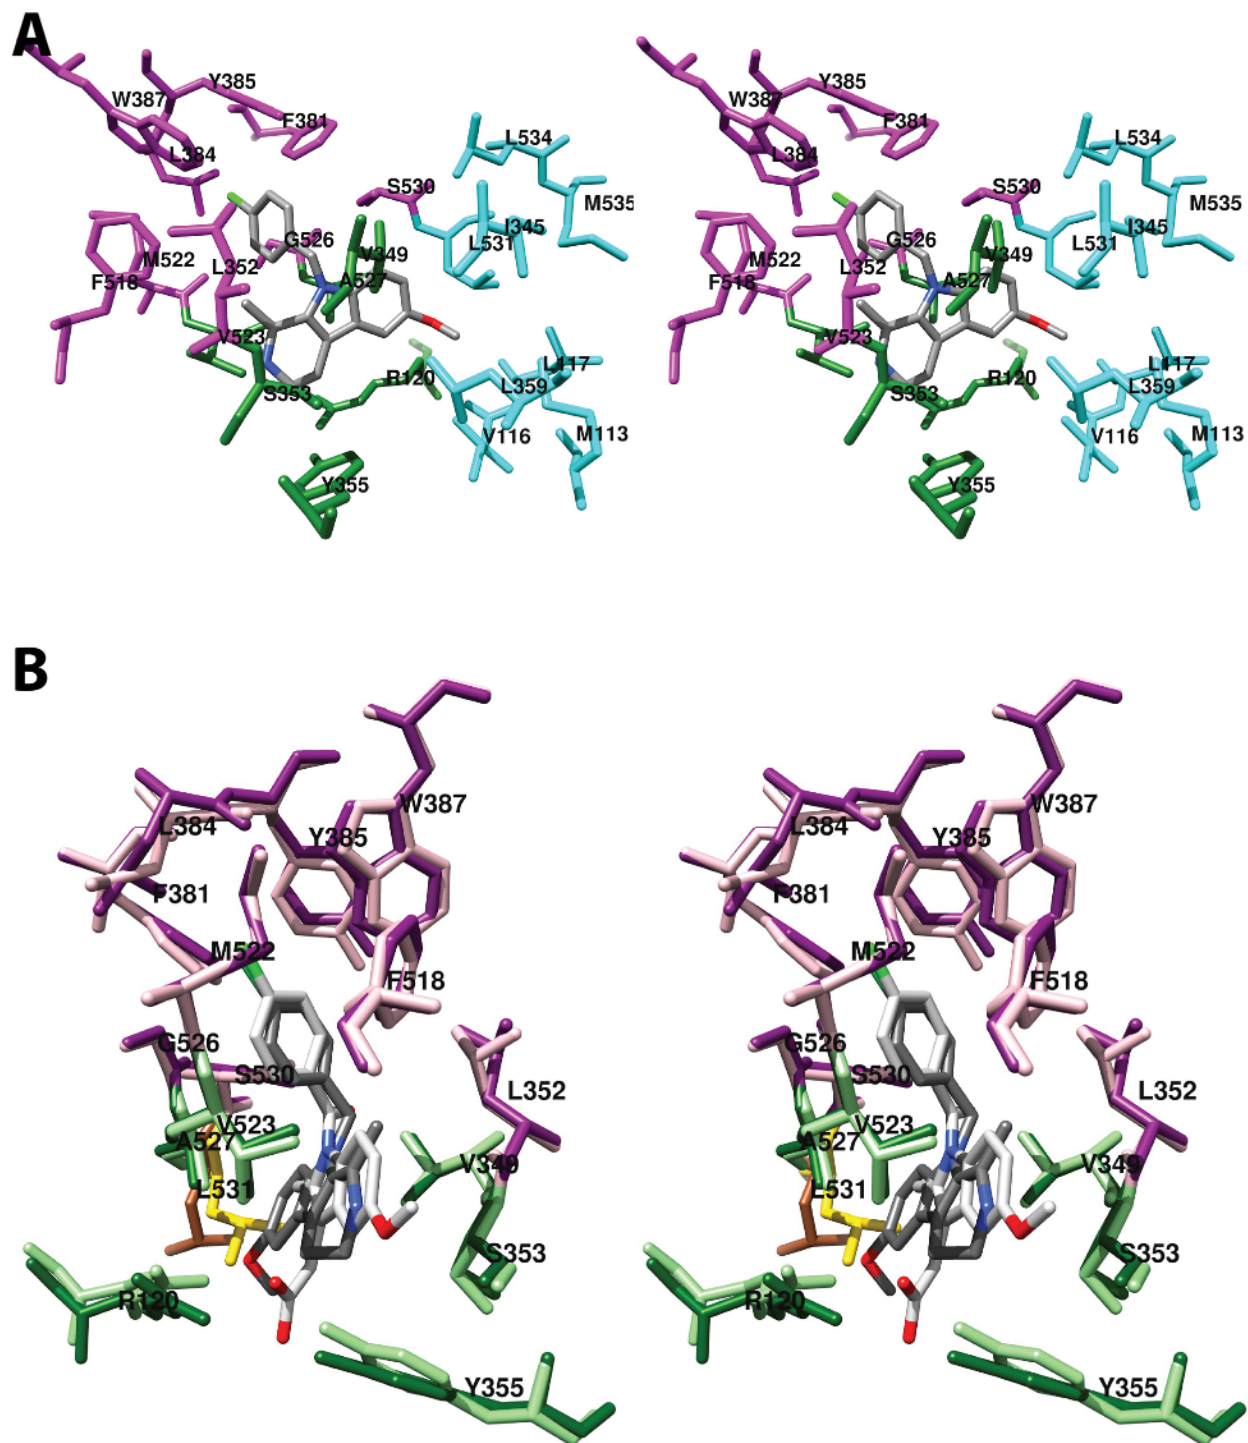

**Figure 23.** (A) Cross-eyed stereo view of the structure of harmaline compound 3 bound in the cyclooxygenase active site of COX-2. The side chains that make up the proximal binding pocket (green), the central binding pocket (magenta), and the oxicam pocket (cyan) are shown. Note that Val-349 is part of both the proximal pocket and the oxicam pocket. It is colored in cyan. (B) Wall-eyed stereo view of an overlay of the structures of harmaline compound 3 and indomethacin bound in the active site of COX-2, including residues that make up the proximal (light/dark green) and central (pink/magenta) binding pockets. Indomethacin and compound 3 are shown in light and dark gray, respectively, and the lighter



residue colors correspond to those in the indomethacin-COX-2 complex. Also shown is Leu-531 (yellow/sienna) which moves away from the constriction to accommodate the tricyclic harmaline nucleus. From PDB #63VR.

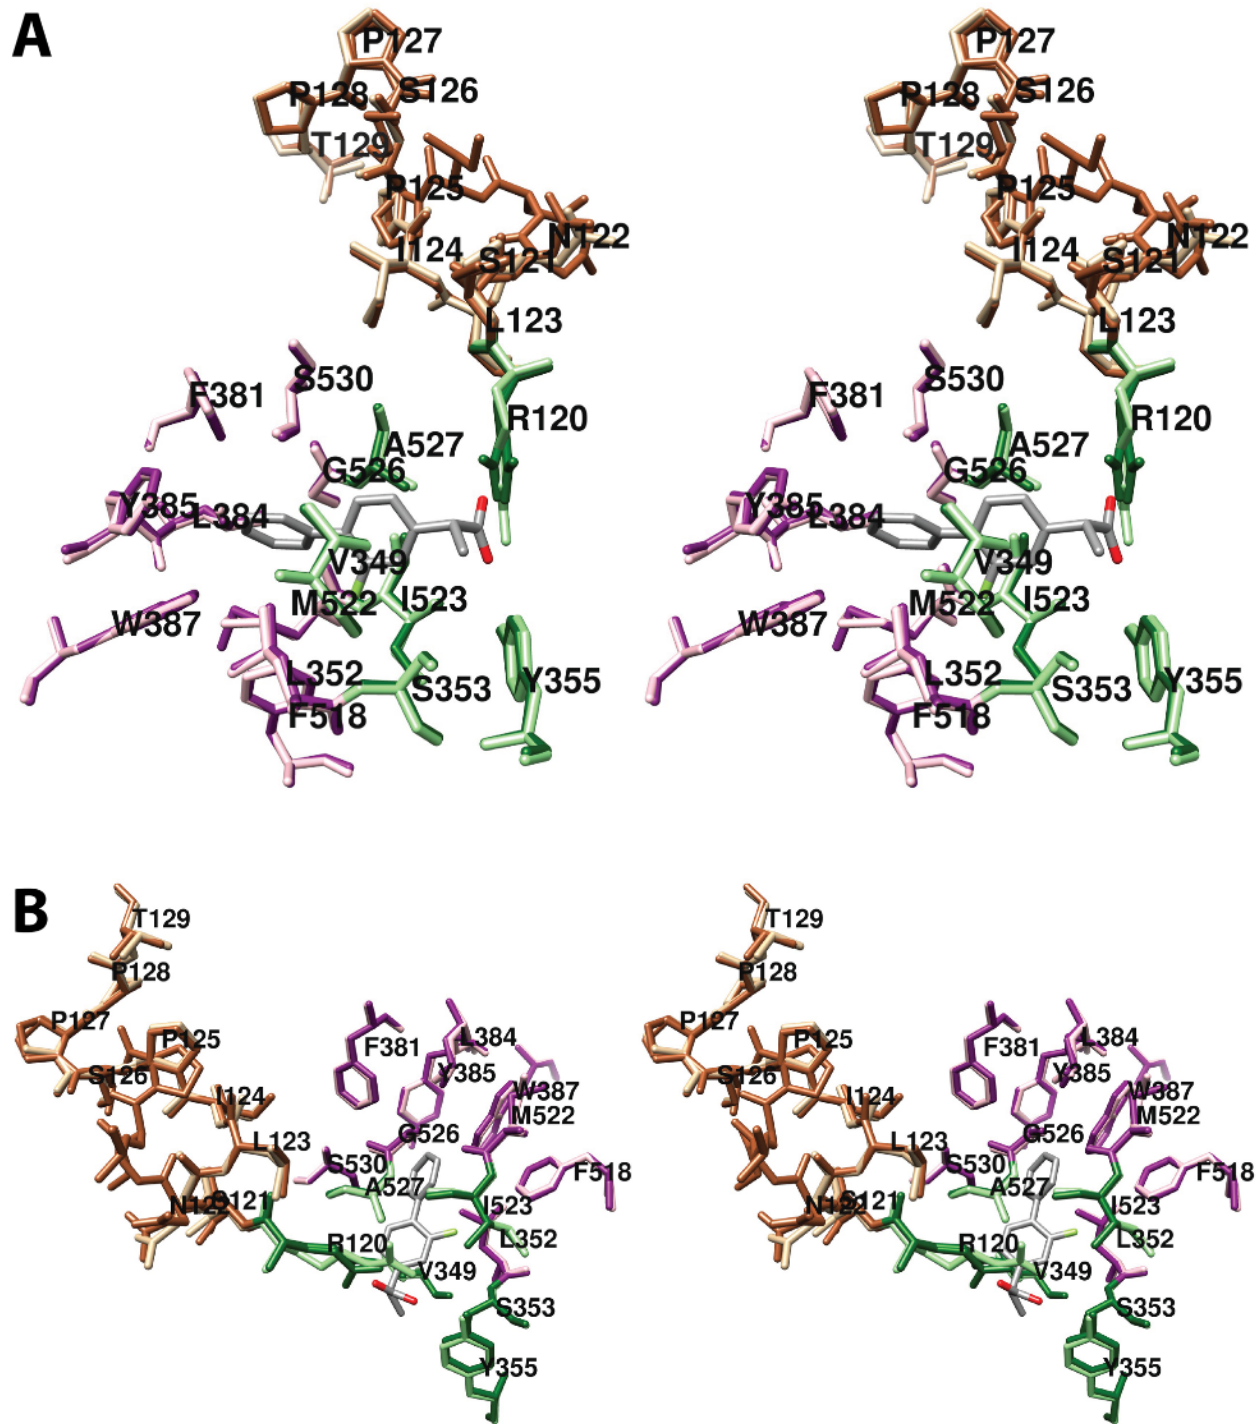

**Figure 24.** (A) and (B) Wall-eyed stereo views of the structure of (*S*)-flurbiprofen bound in the cyclooxygenase active site of a wild-type/R12Q COX-1 heterodimer and the side chains that make up the proximal binding pocket (green) and the central binding pocket (magenta). The structures of the two subunits are overlaid, with the wild-type subunit (containing flurbiprofen) shown in the lighter colors. Also shown are residues 121-129, which exist in two conformations in the R120Q subunit (sienna) depending on the presence or absence of bound flurbiprofen. Subunits containing inhibitor exhibit the same conformation as is observed in the wild-type subunit (tan), whereas those lacking inhibitor diverge between Ser-121 and Pro-125. From PDB #3N8W.

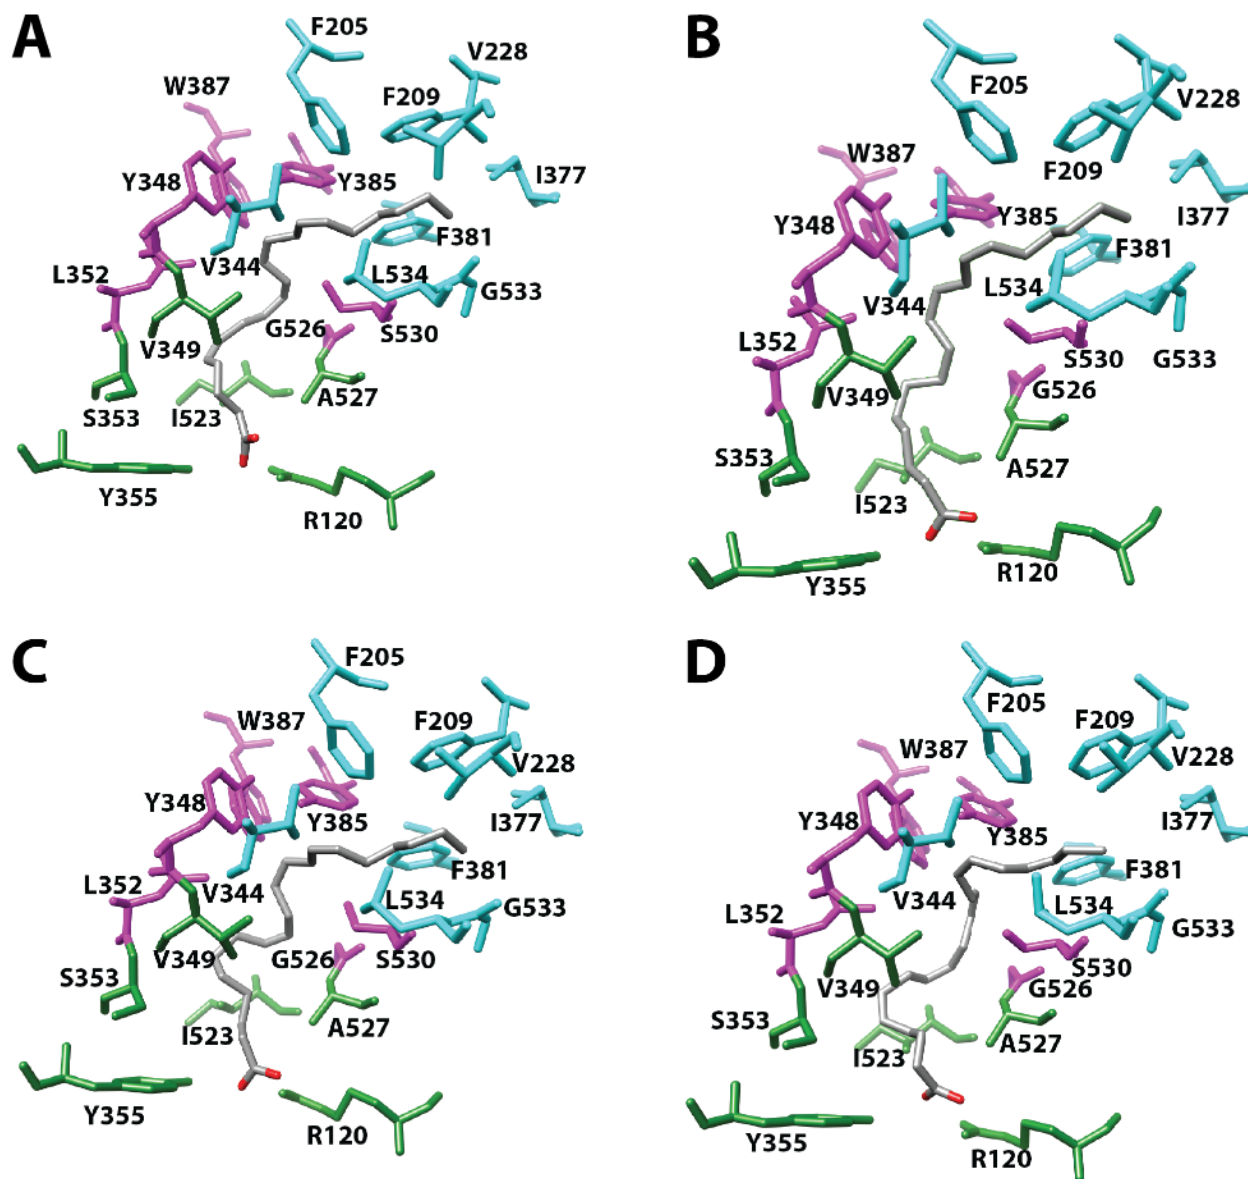

**Figure S1.** Structure of (A) AA, (B) LA, (C) DHLA, and (D) EPA, bound in the cyclooxygenase active site of COX-1 and the side chains that make up the proximal binding pocket (green), the central binding pocket (magenta), and the distal binding pocket (cyan). An overlay of these structures is provided in stereoscopic view in Figure 5B. From PDB #1DIY, #1IGZ, #1FE2, and #1IGX.



proximal binding pocket (green), the central binding pocket (magenta), and the distal binding pocket (cyan). An overlay of these structures is provided in Figure S3. From PDB #3HS5 (chain B), #4E1G, #3HS6 (chain B), #3HS7, and #3QH0.

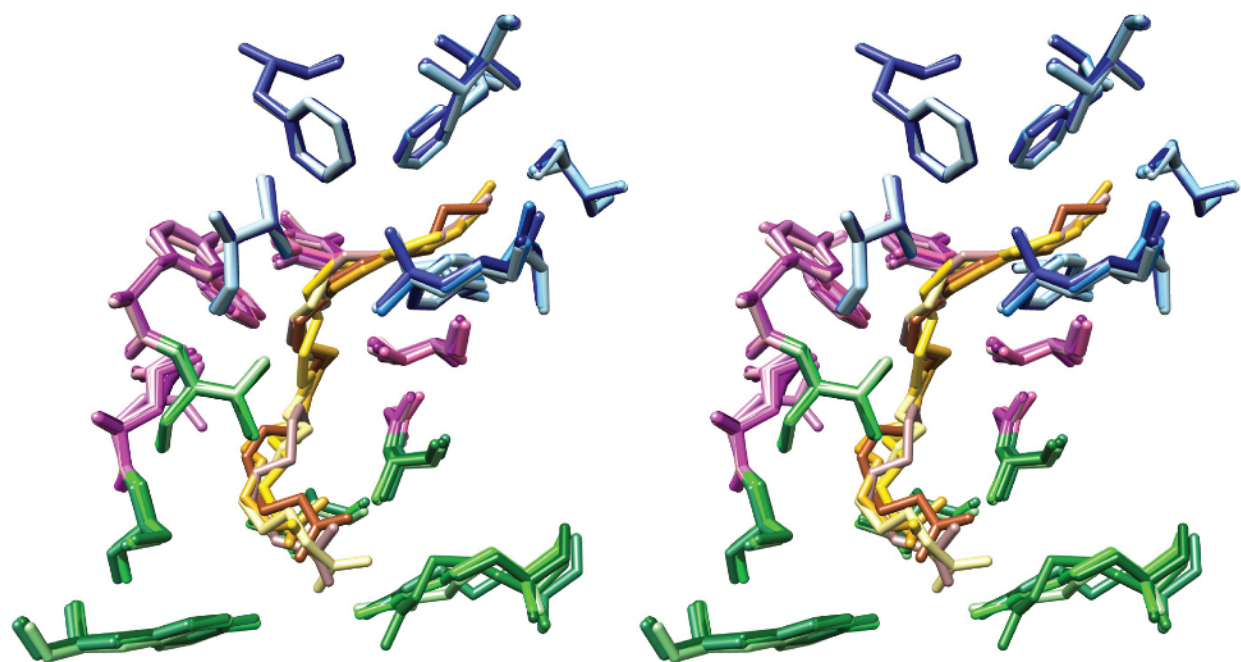

**Figure S3.** Cross-eyed stereo view of an overlay of the structures of five fatty acids in the cyclooxygenase active site of COX-2 and the side chains that make up the proximal binding pocket (green), the central binding pocket (magenta), and the distal binding pocket (blue). Fatty acids and amino acid side chains are colored from lightest to darkest in the order PA,  $\alpha$ LA, EPA, DHA, and AA. Notable is the minimal movement of active site residues to accommodate the structural differences among the various fatty acids. Monoscopic views of the individual structures are provided in Figure S2. From PDB #3HS5 (chain B), #4E1G, #3HS6 (chain B), #3HS7, and #3QH0 (chain A).



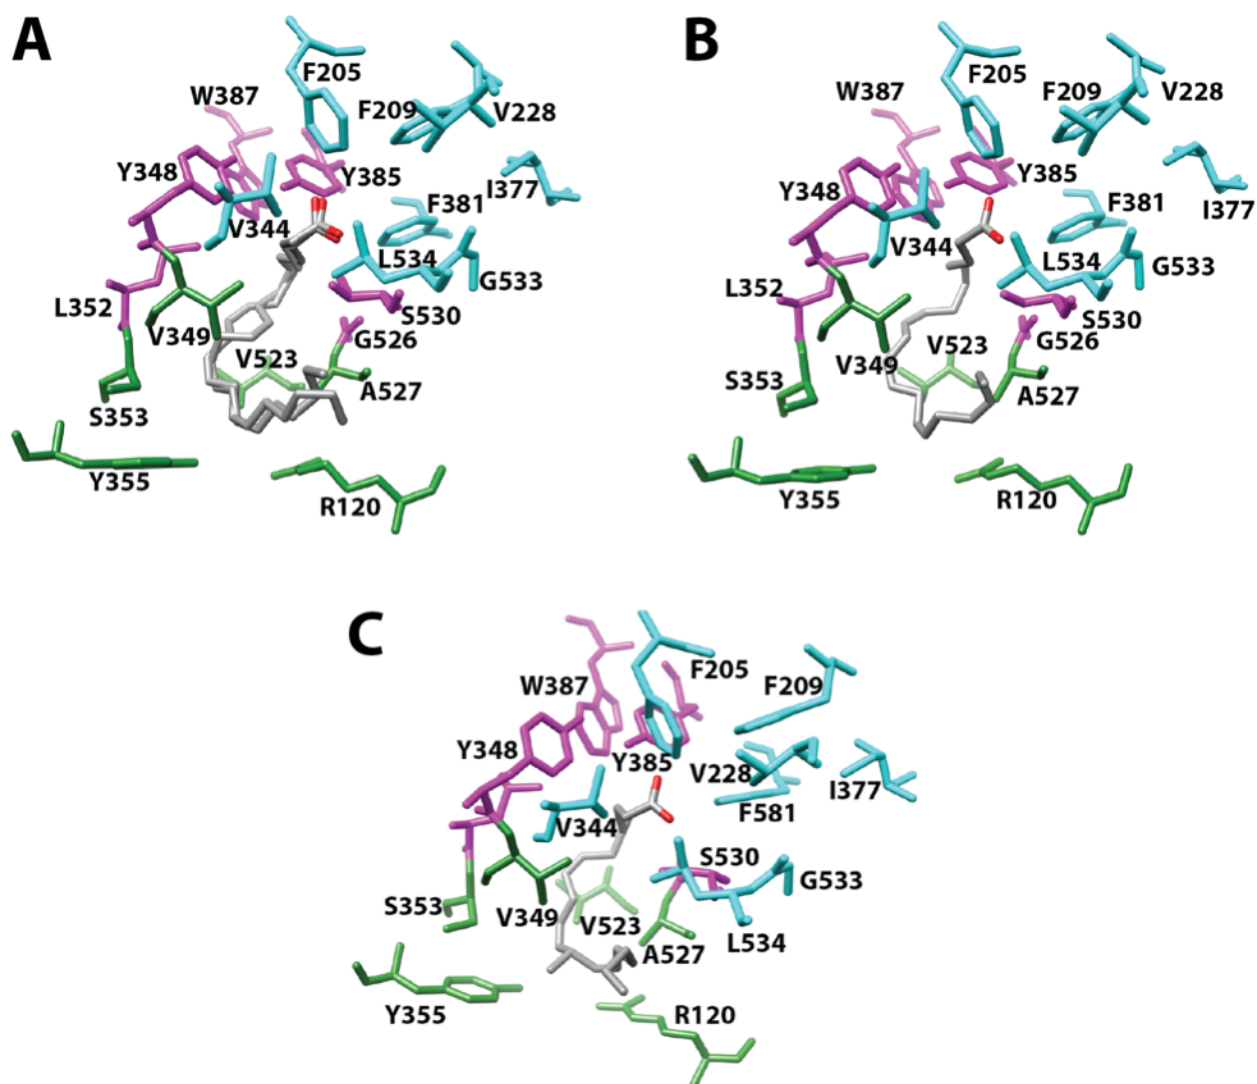

**Figure S4.** Structure of (A) AA (nonproductive conformation), (B) EPA (nonproductive conformation), and (C) 13-Me-AA bound in the cyclooxygenase active site of COX-2 and the side chains that make up the proximal binding pocket (green), the central binding pocket (magenta), and the distal binding pocket (cyan). Note that AA is observed in two slightly different conformations. From PDB #3HS5 (chain A), #3HS6 (chain A), and #4RUT.

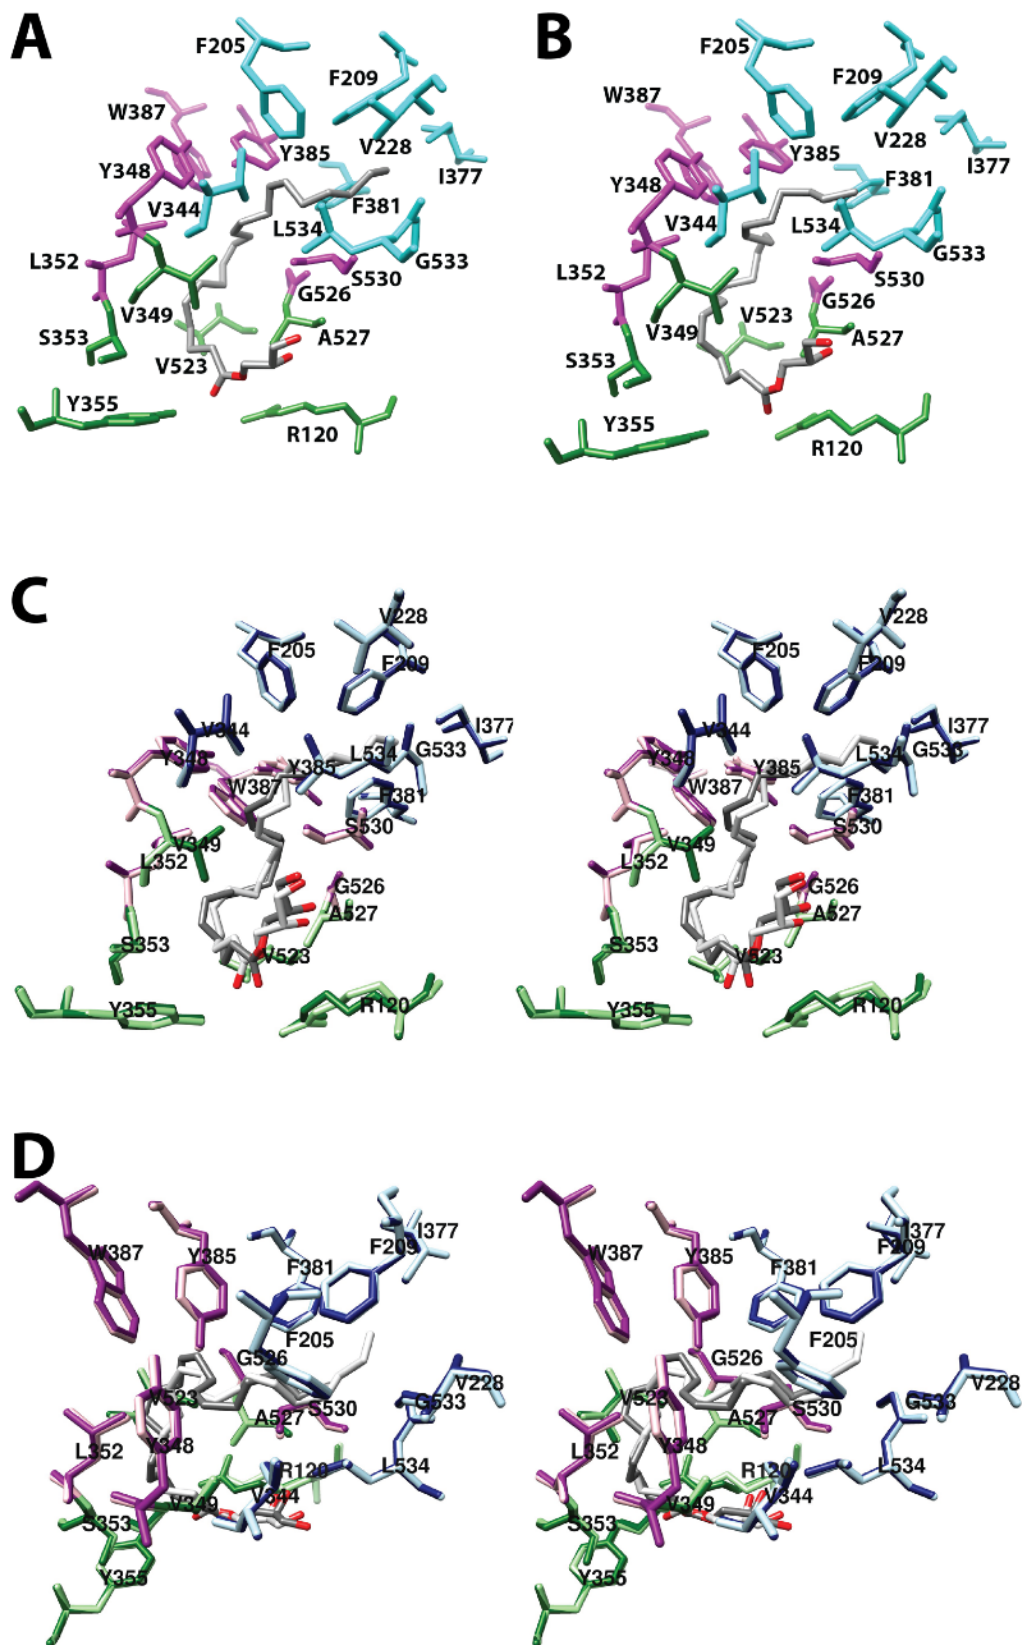

**Figure S5.** Structure of 1-AG in the (A) productive conformation and (B) nonproductive conformation



bound in the active site of COX-2 and the side chains that make up the proximal binding pocket (green), the central binding pocket (magenta), and the distal binding pocket (cyan). (C) and (D) Two different cross-eyed stereo views of the overlay of the structures of the nonproductive (dark gray) and productive (light gray) conformations of 1-AG bound in the cyclooxygenase active site. Residues in the surrounding binding pockets are colored similarly to those in (A) and (B) with the lighter and darker colors corresponding to the productive and nonproductive conformations, respectively. From PDB #3MDL.

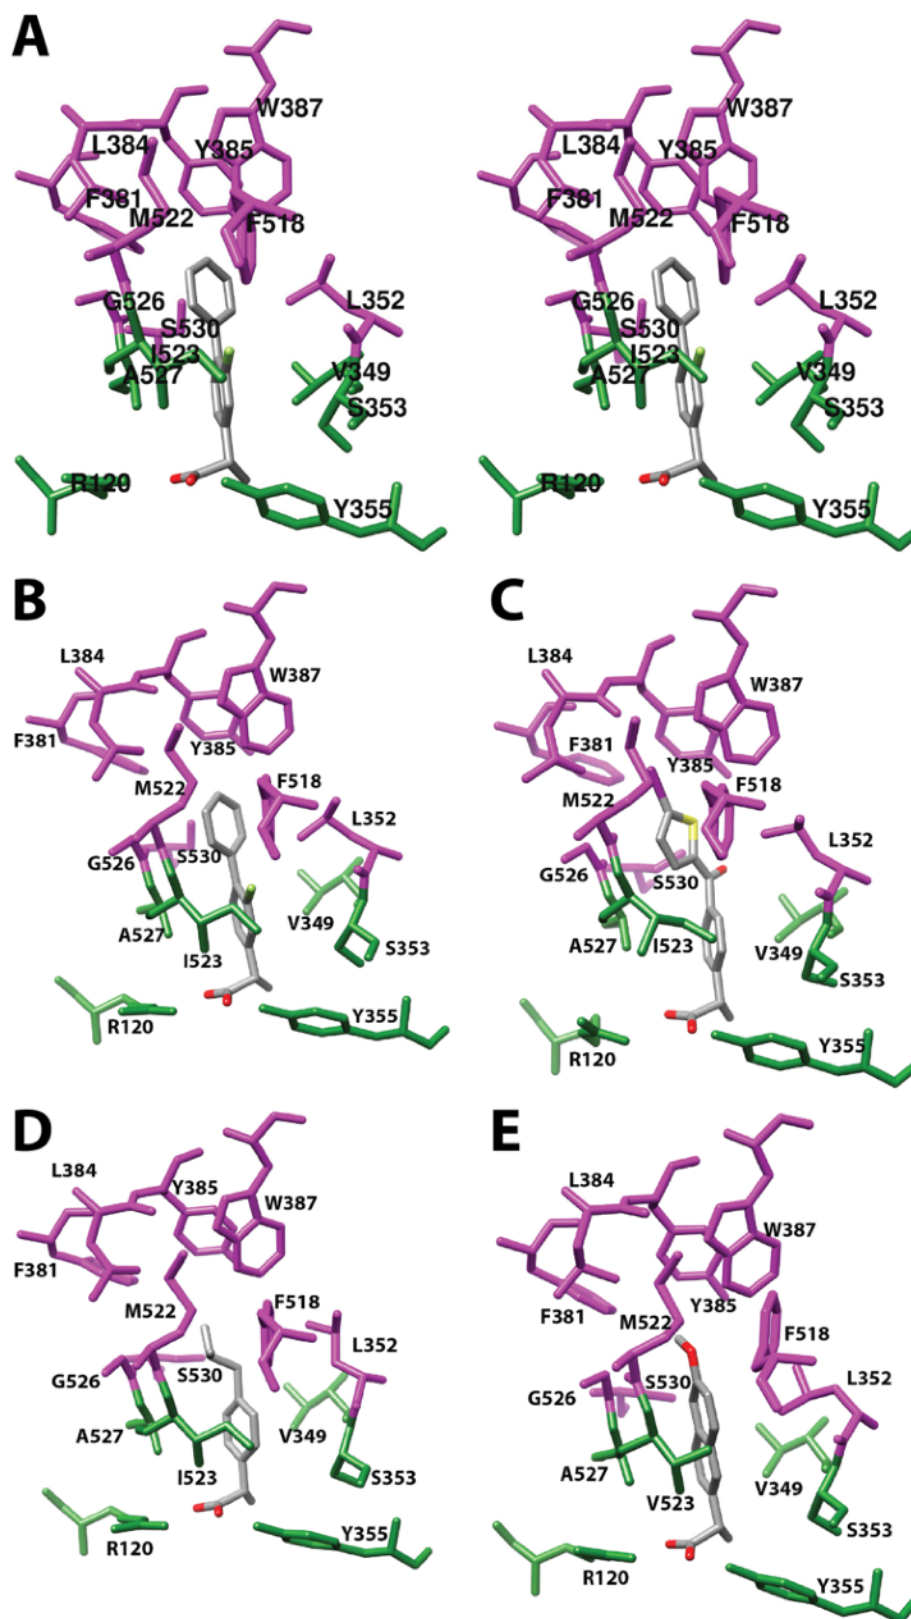

**Figure S6.** Cross-eyed stereo view of the structure of (*S*)-flurbiprofen bound in the cyclooxygenase active site of COX-1. Structures of (B) (*S*)-flurbiprofen, (C) (*S*)-iodosuprofen, (D) (*S*)-ibuprofen, and (E) (*S*)-

naproxen, bound in the cyclooxygenase active site of COX-1 (B, C, and D) or COX-2 (E). The side chains that make up the proximal binding pocket (green) and the central binding pocket (magenta) are shown. From PDB #1EQH (A and B), #1PGE, #1EQG, and #3NT1.

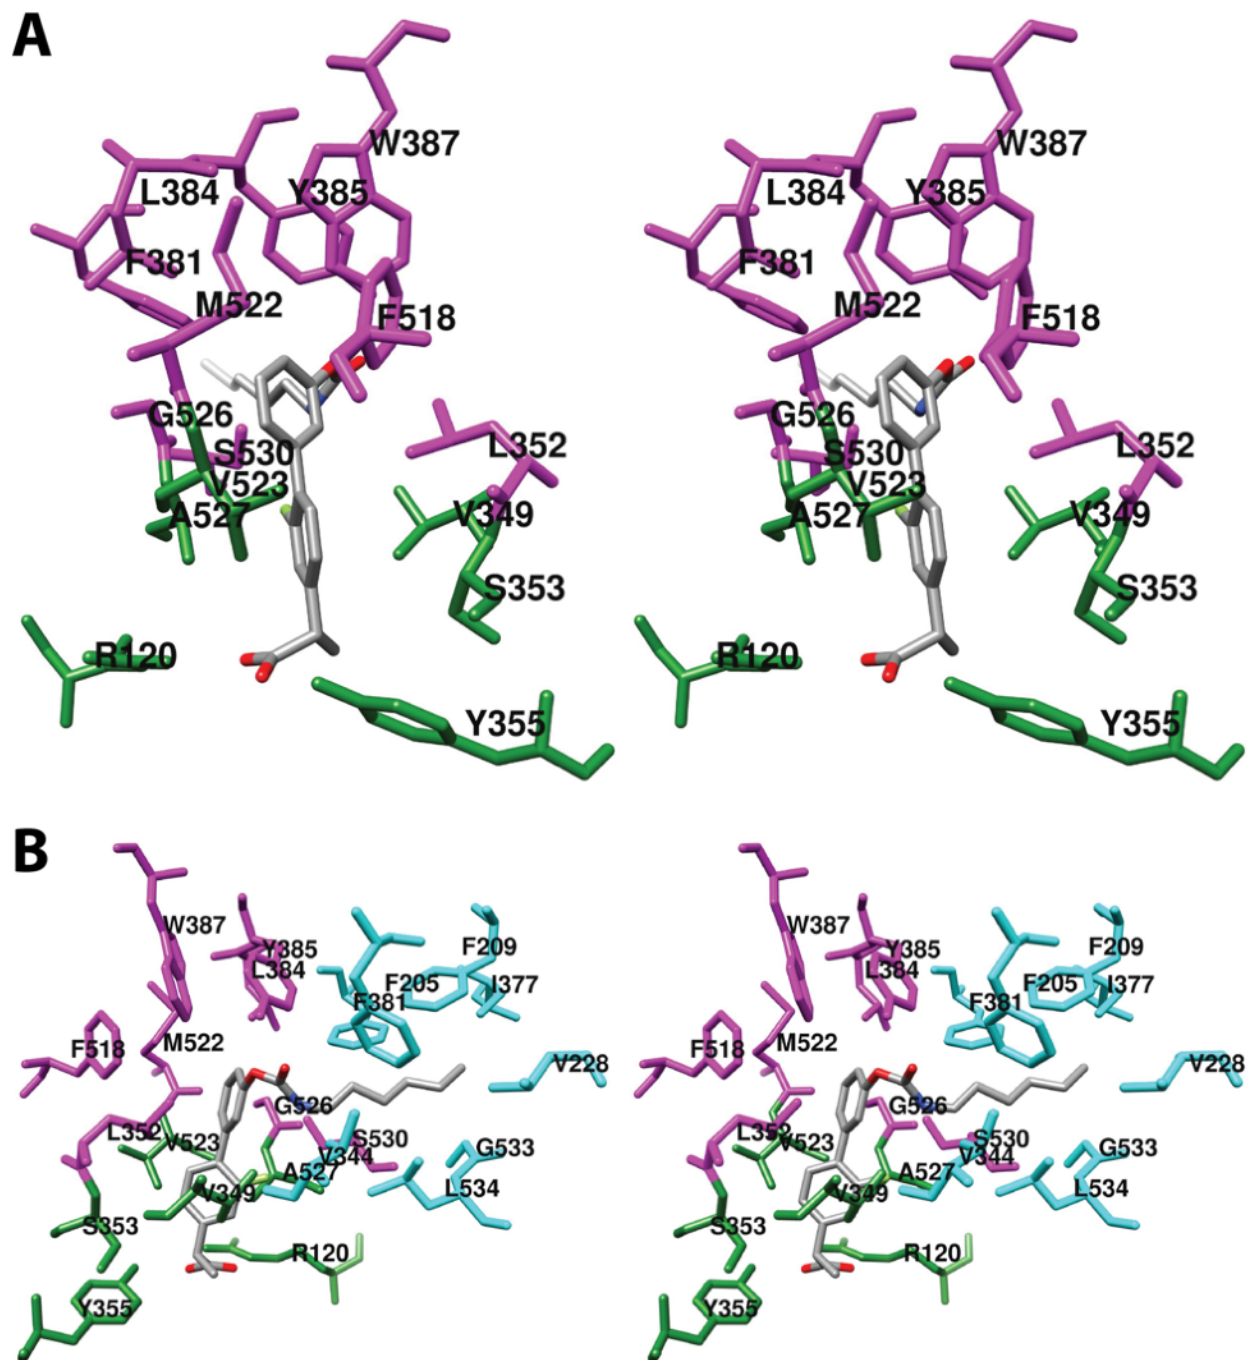

**Figure S7.** (A) Cross-eyed stereo view of the structure of ARN-2508 bound in the cyclooxygenase active site of COX-2 and the side chains that make up the proximal binding pocket (green) and the central binding pocket (magenta). (B) Same as (A) from a different perspective. Residues belonging to the distal AA binding pocket have been added and highlighted in cyan to reveal the localization of the hydrocarbon tail of ARN-2508 in this pocket. From PDB #5W58.



**Figure S8.** Structure of (A) indomethacin, (B) alclofenac, (C) an indomethacin-podophyllotoxin conjugate,

and (D) a *nido*-dicarbaborate derivative of indomethacin bound in the cyclooxygenase active site of COX-2 (A, C, & D) or COX-1 (B). The side chains that make up the proximal binding pocket (green), the central binding pocket (magenta), and membrane-binding domain residues that are predicted by molecular modeling to interact with the podophyllotoxin moiety (cyan) (C) are shown. From PDB #4COX, #1HT8, #4OTJ, and #4Z0L.

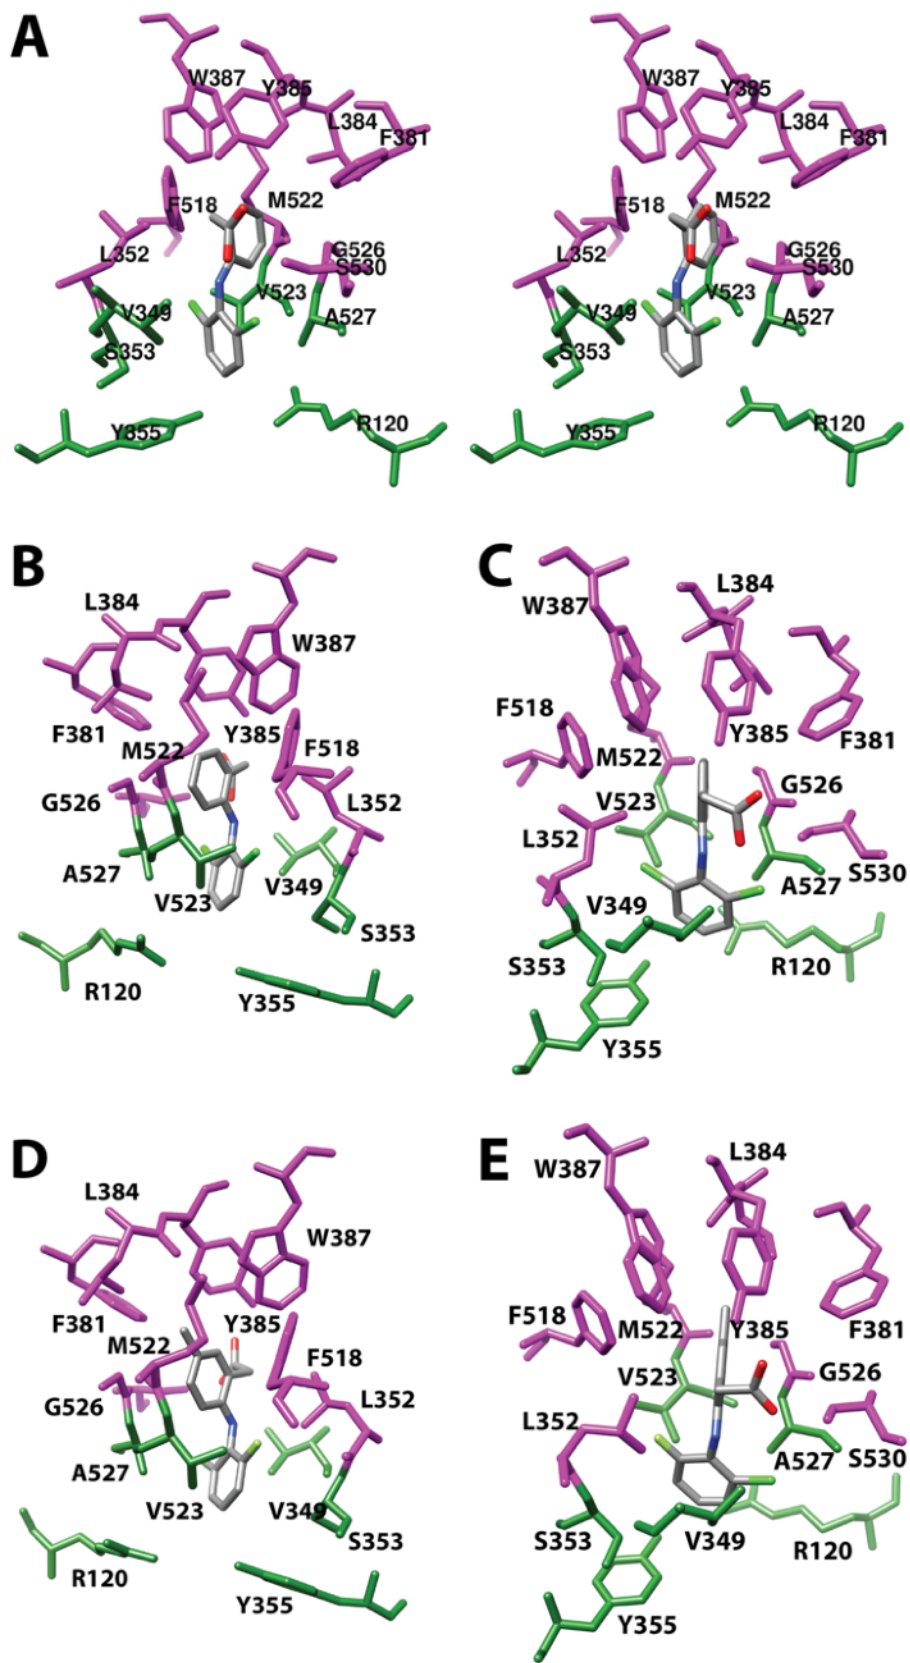

**Figure S9.** (A) Cross-eyed stereo view of diclofenac bound in the cyclooxygenase active site of COX-2.

Structures of (B & C) diclofenac and (D & E) lumiracoxib bound in the cyclooxygenase active site of COX-2. The side chains that make up the proximal binding pocket (green) and the central binding pocket (magenta) are shown. In each case, two views of the inhibitor are provided. Both are from the side (i.e., parallel to the plane of the membrane). Views (A, C, and E) highlight the proximity of the carboxylate of the inhibitor to the side chains of Ser-530 and Tyr-385. From PDB #1PXX and #4OTY.



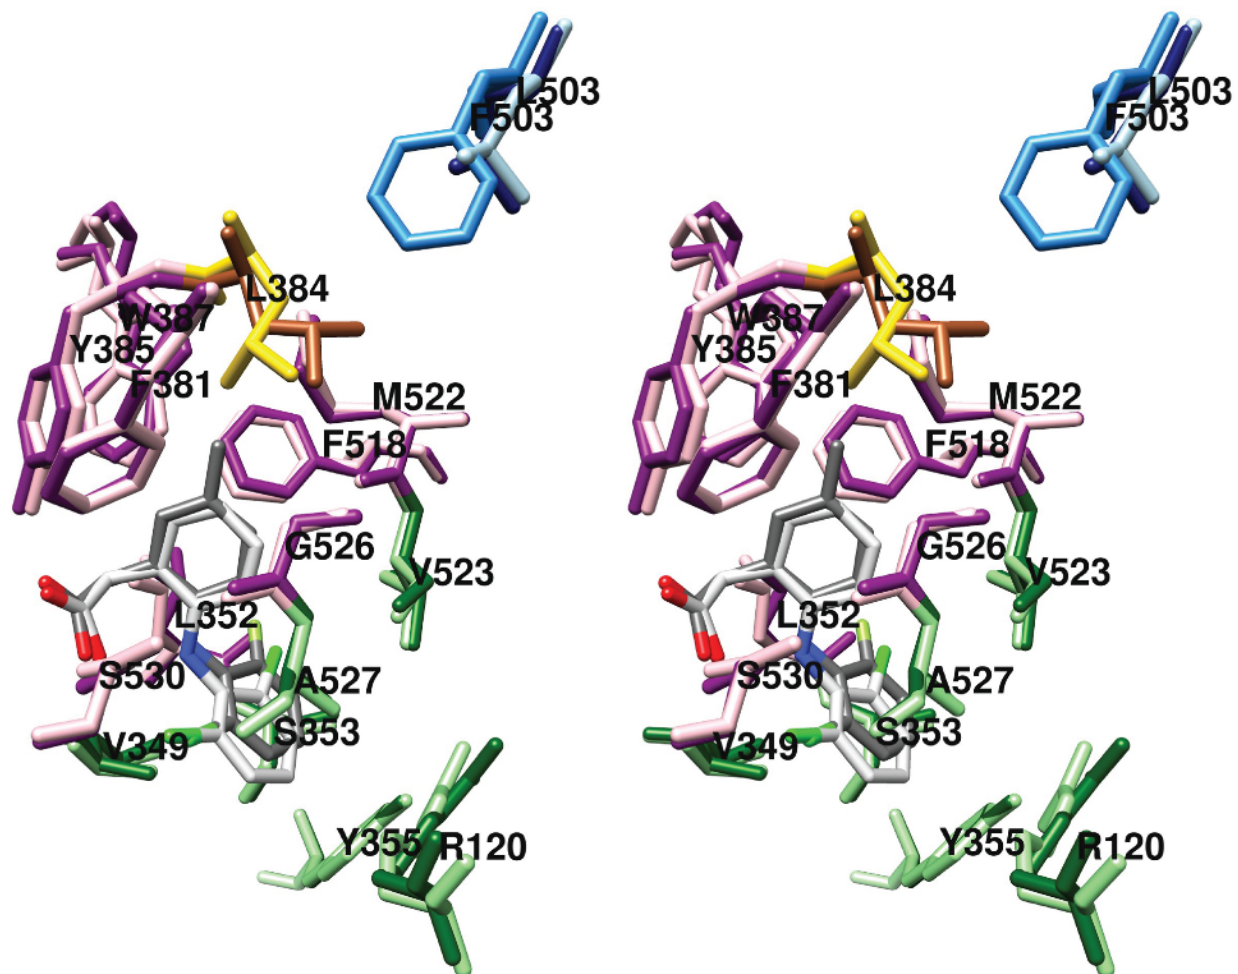

**Figure S10.** Cross-eyed stereo view of the overlay of the structures of diclofenac and lumiracoxib, bound in the cyclooxygenase active site of COX-2 and the side chains that make up the proximal binding pocket (light/dark green) and the central binding pocket (pink/magenta). Leu-384 is highlighted in gold/sienna, and Leu-503 is shown in light blue/navy blue. Also shown is the position that Phe-503 (dodger blue) occupies in the structure of diclofenac bound in the cyclooxygenase active site of COX-1. In each case, structures related to diclofenac (light gray) are shown in the lighter color and those related to lumiracoxib (dark gray) are shown in the darker color. From PDB #1PXX, #4OTY, and #3N8Y.

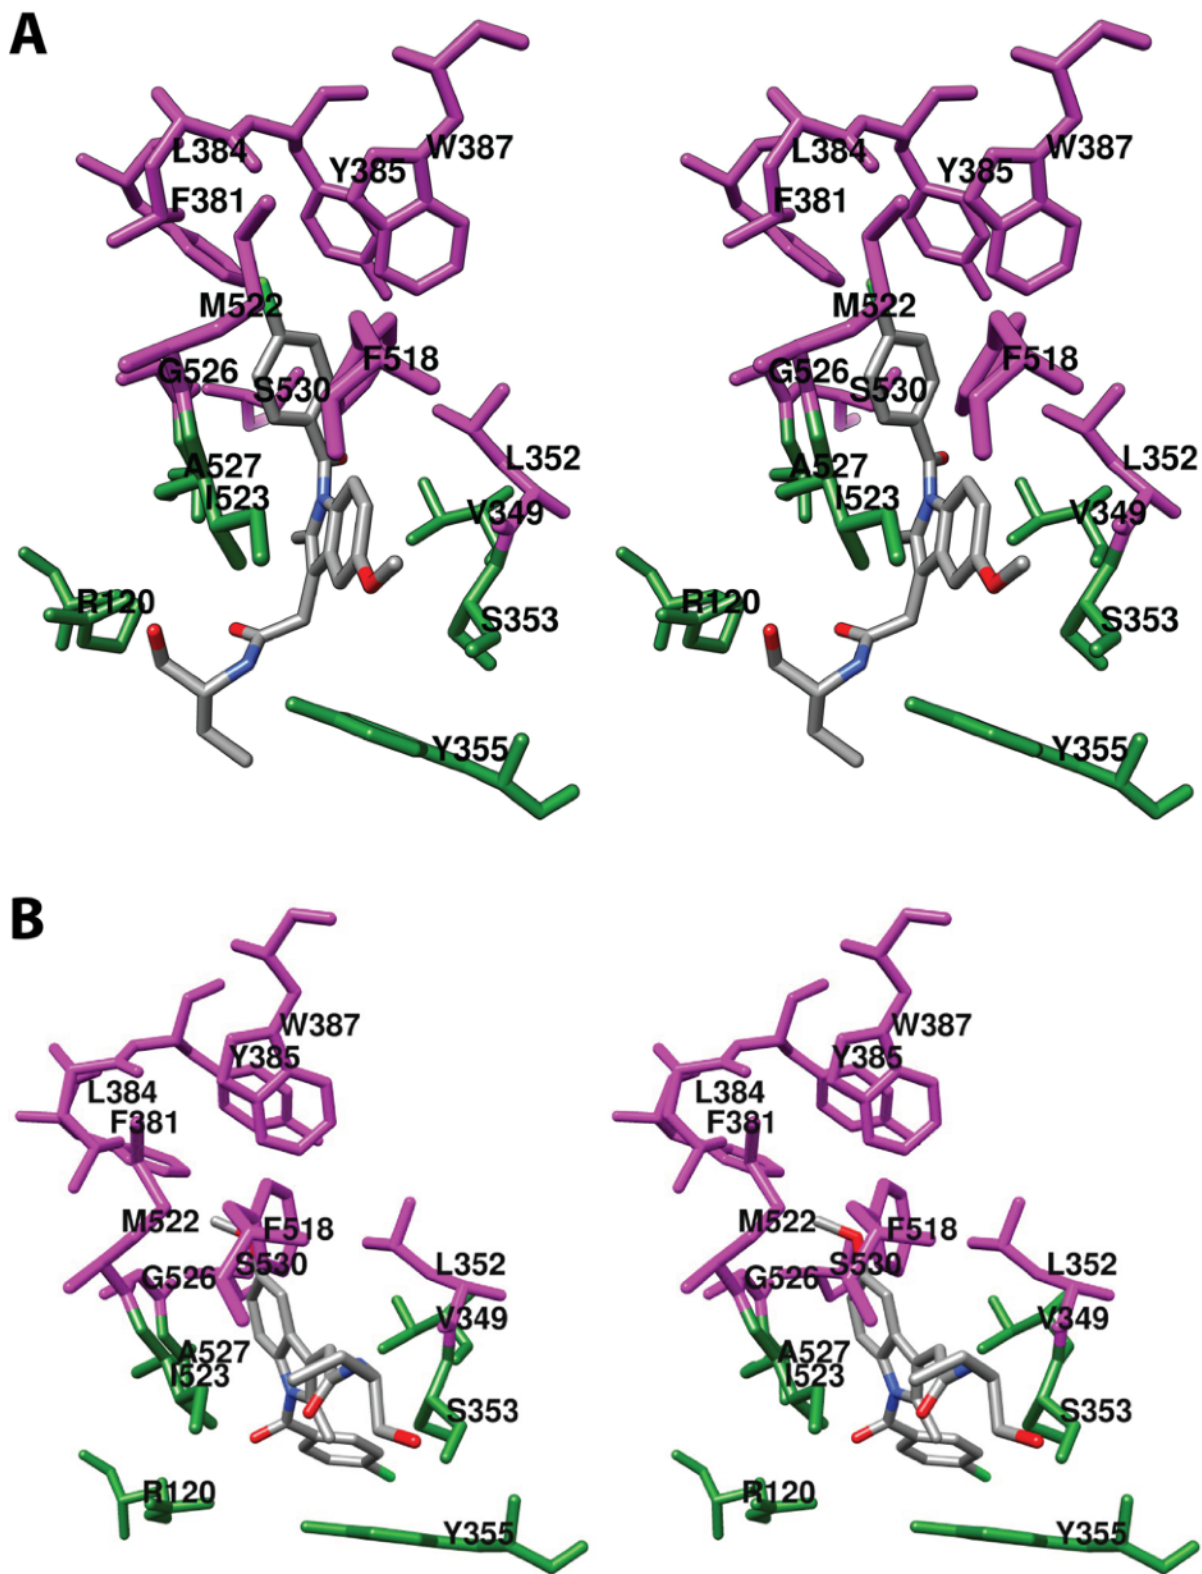

**Figure S11.** Cross-eyed stereo view of the structure of (A) indomethacin-(*R*)- $\alpha$ -ethyl-ethanolamide and (B) indomethacin-(*S*)- $\alpha$ -ethyl-ethanolamide bound in the cyclooxygenase active site of COX-1 and the

side chains that make up the proximal binding pocket (green) and the central binding pocket (magenta).  
From PDB #2OYE and #2OYU.

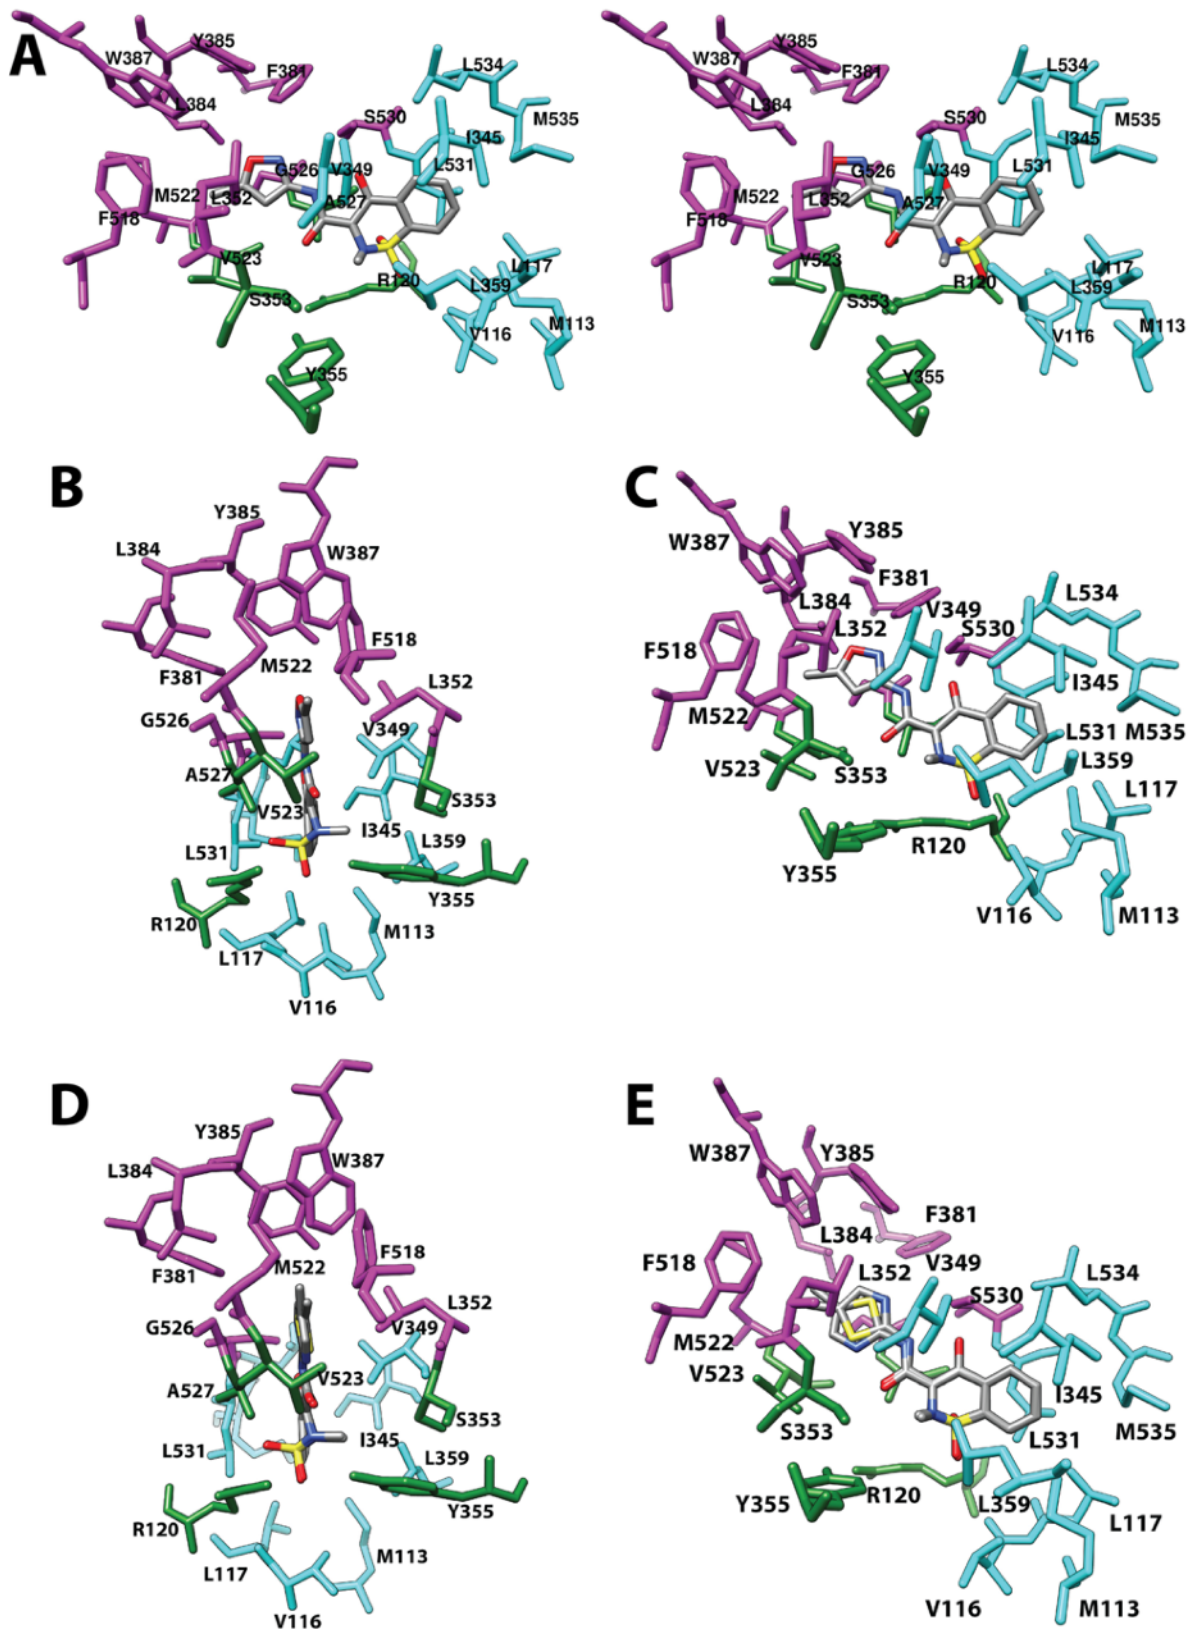

**Figure S12.** (A) Cross-eyed stereo view of isoxicam bound in the cyclooxygenase active site of COX-2. Structure of (B & C) isoxicam and (D & E) meloxicam bound in the cyclooxygenase active site of COX-2.

The side chains that make up the proximal binding pocket (green), the central binding pocket (magenta), and the oxicam pocket (cyan) are shown. Note that Val-349 is part of both the proximal pocket and the oxicam pocket. It is colored in cyan. The exact conformation of the thiazole ring of meloxicam could not be determined. From PDB #4M10 and #4M11.

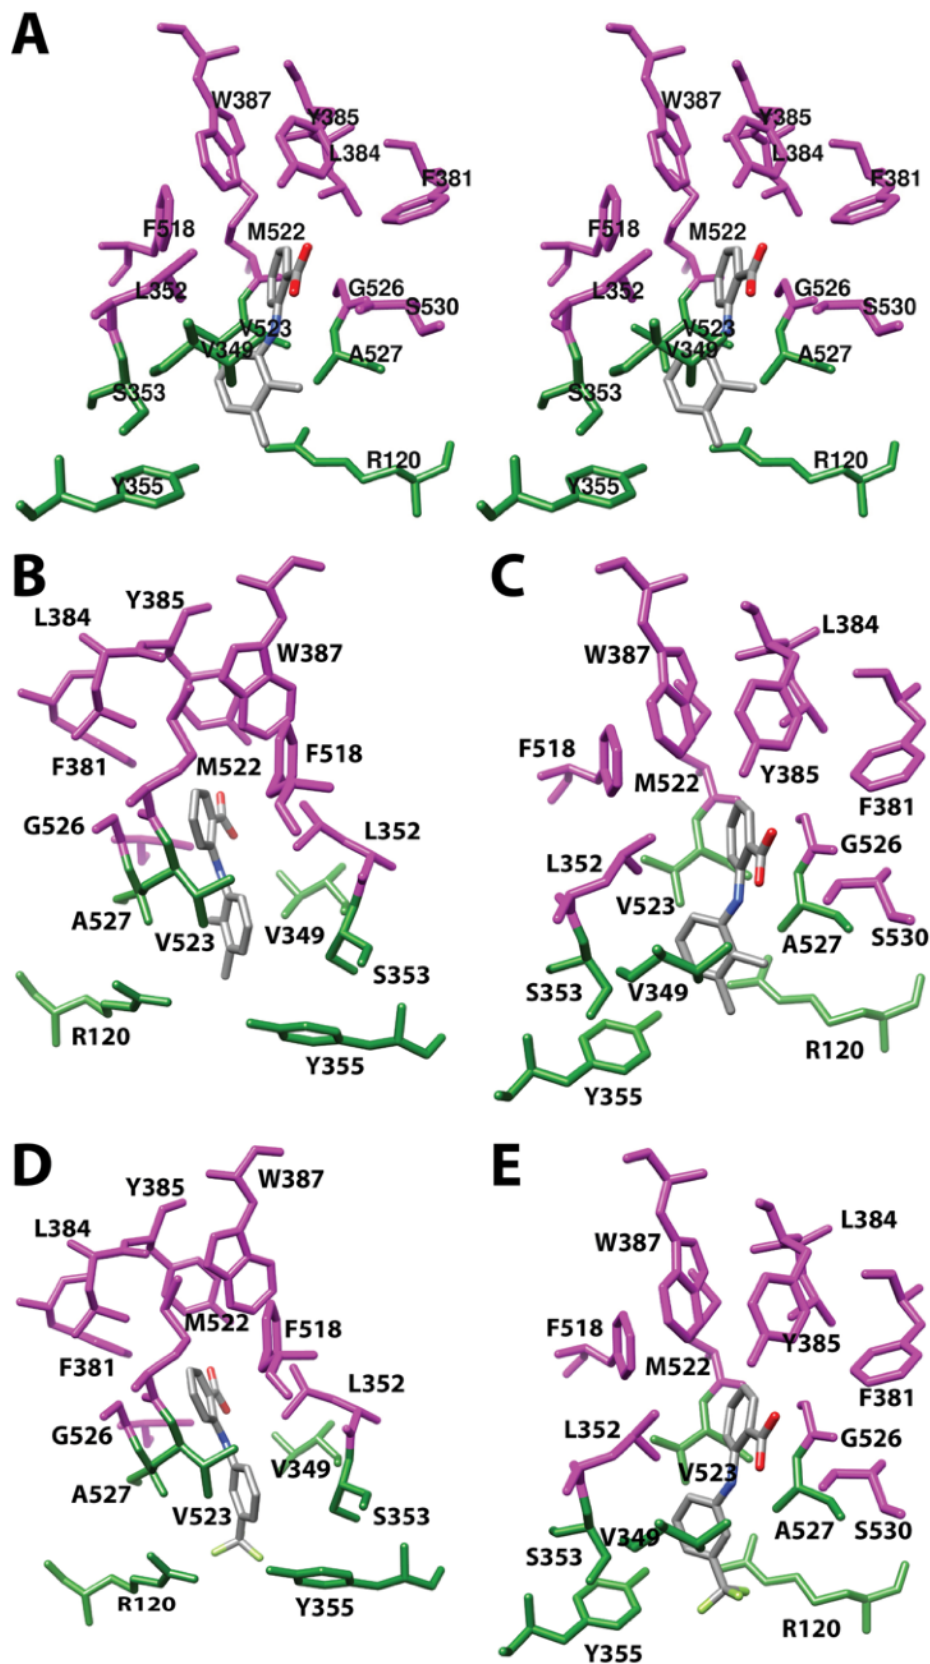

**Figure S13.** (A) Cross-eyed stereo view of mefenamic acid bound in the cyclooxygenase active site of



COX-2. Structures of (B & C) mefenamic acid and (D & E) flufenamic acid bound in the cyclooxygenase active site of COX-2. The side chains that make up the proximal binding pocket (green) and the central binding pocket (magenta) are shown. In each case, two views of the inhibitor are provided. Both are from the side (i.e., parallel to the plane of the membrane). Views (A), (C), and (E) highlight the proximity of the carboxylate of the inhibitor to the side chains of Ser-530 and Tyr-385. From PDB #5IKR and #5IKV.



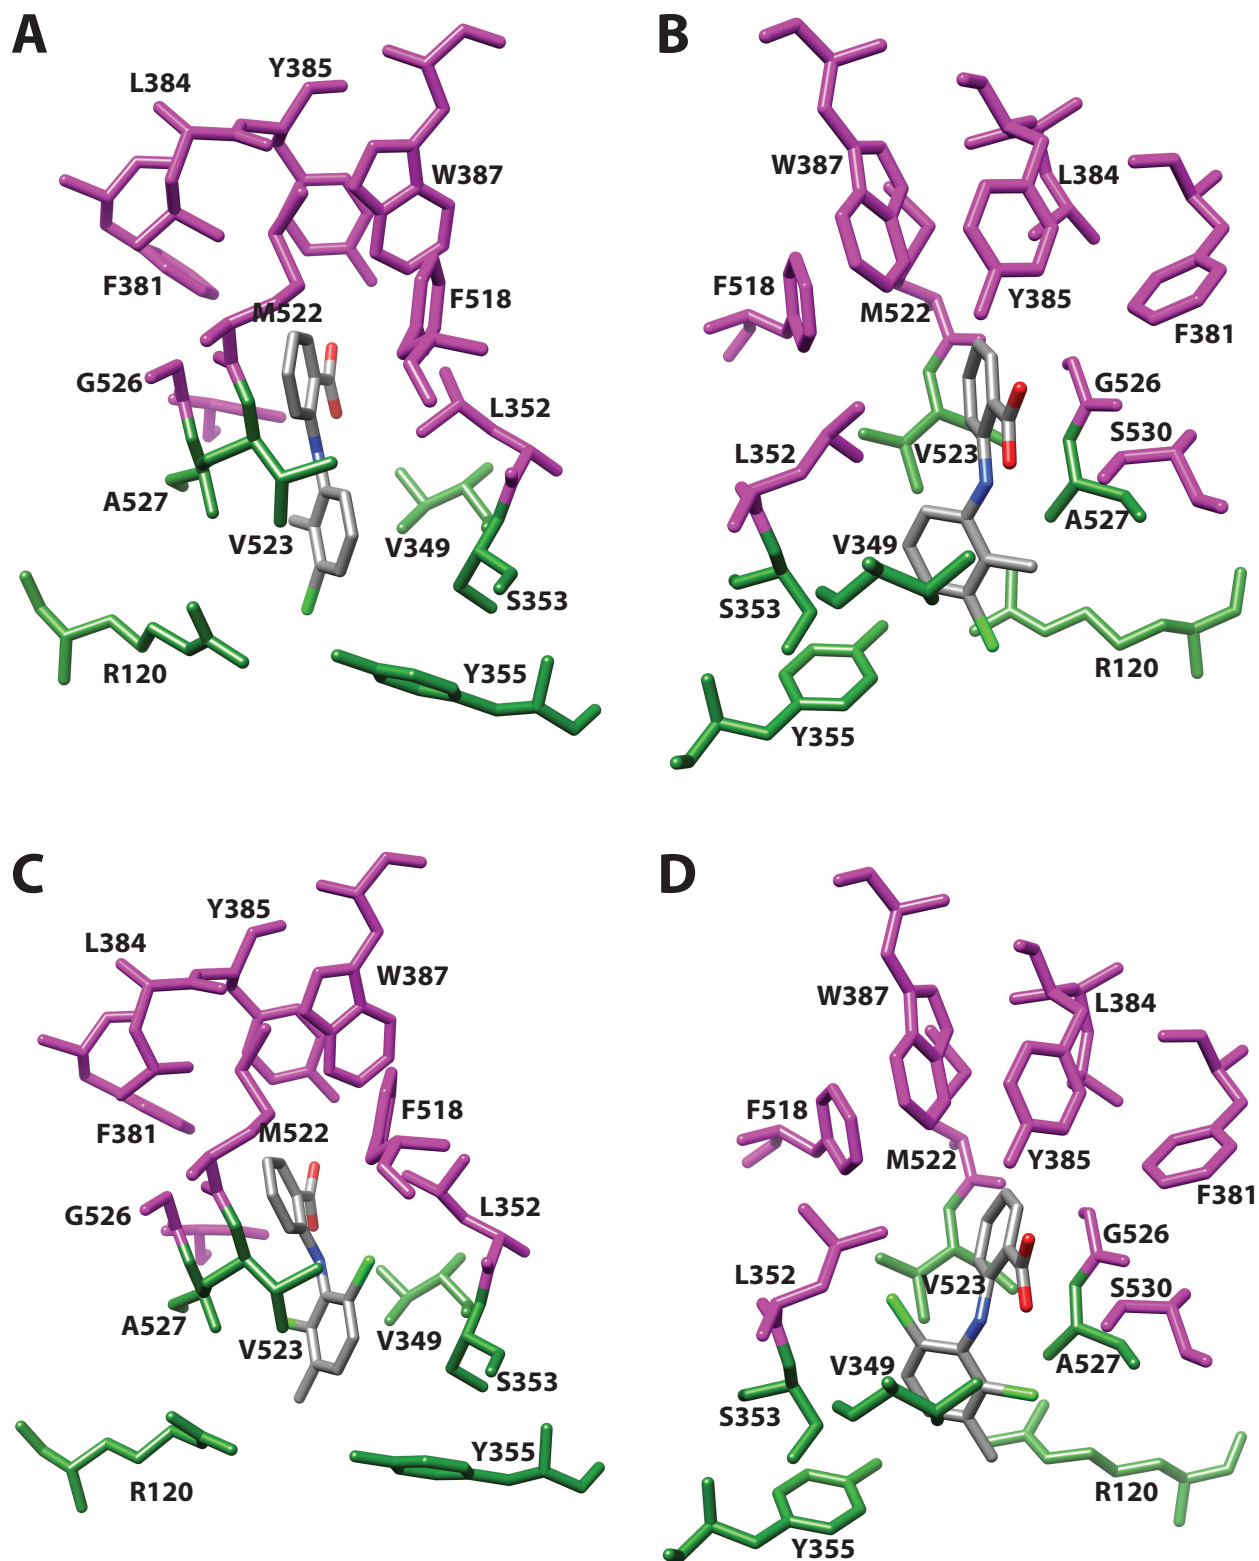

**Figure S14.** Structure of (A & B) tolfenamic acid and (C & D) meclufenamic acid bound in the cyclooxygenase active site of COX-2 and the side chains that make up the proximal binding pocket (green) and the central binding pocket (magenta). In each case, two views of the inhibitor are shown.

Both are from the side (i.e., parallel to the plane of the membrane). Views (B) and (D) highlight the proximity of the carboxylate of the inhibitor to the side chains of Ser-530 and Tyr-385. From PDB #5IKT and #5IKQ.

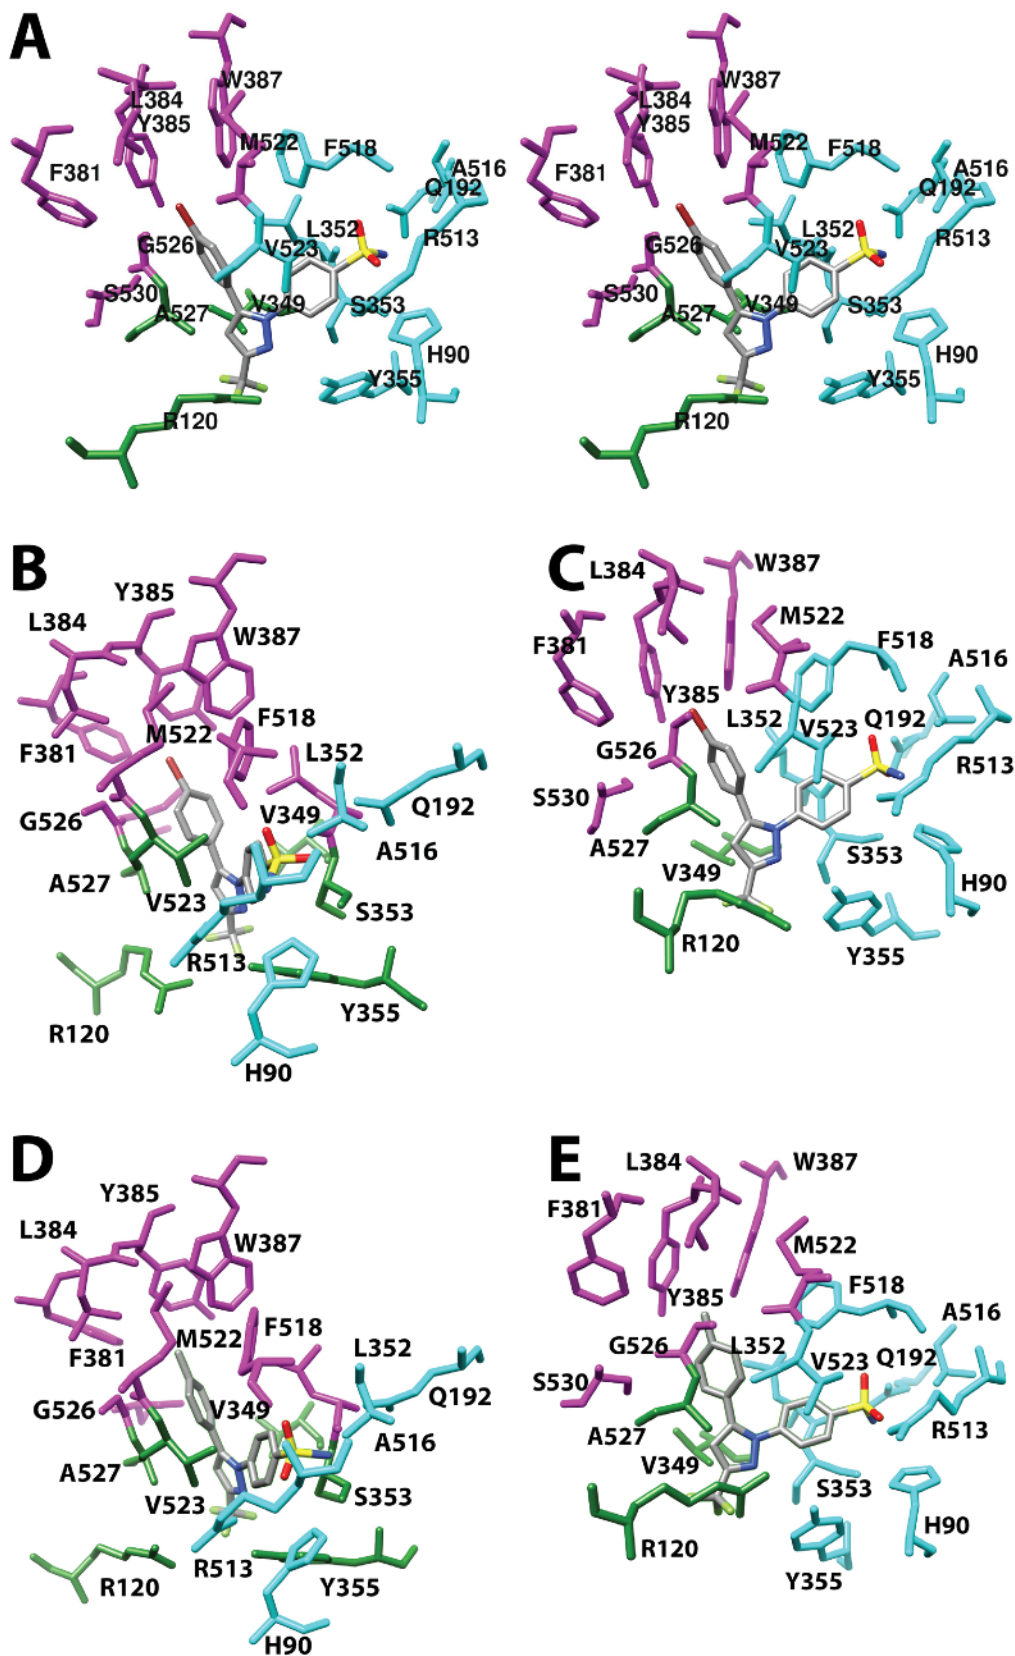

**Figure S15.** (A) Cross-eyed stereo view of SC-558 bound in the cyclooxygenase active site of COX-2.

Structures of SC-558 (B & C) and celecoxib (D & E) bound in the cyclooxygenase active site of COX-2. The side chains that make up the proximal binding pocket (green), the central binding pocket (magenta), and the COX-2 side pocket (cyan) are shown. In (B) and (D), the residues are colored as in most previous figures. In (A), (C), and (E), some residues in the proximal and central binding pockets that are shared with the COX-2 side pocket are colored cyan to highlight the interaction with the phenylsulfonamide group of each inhibitor. From PDB #6COX and #3LN1.

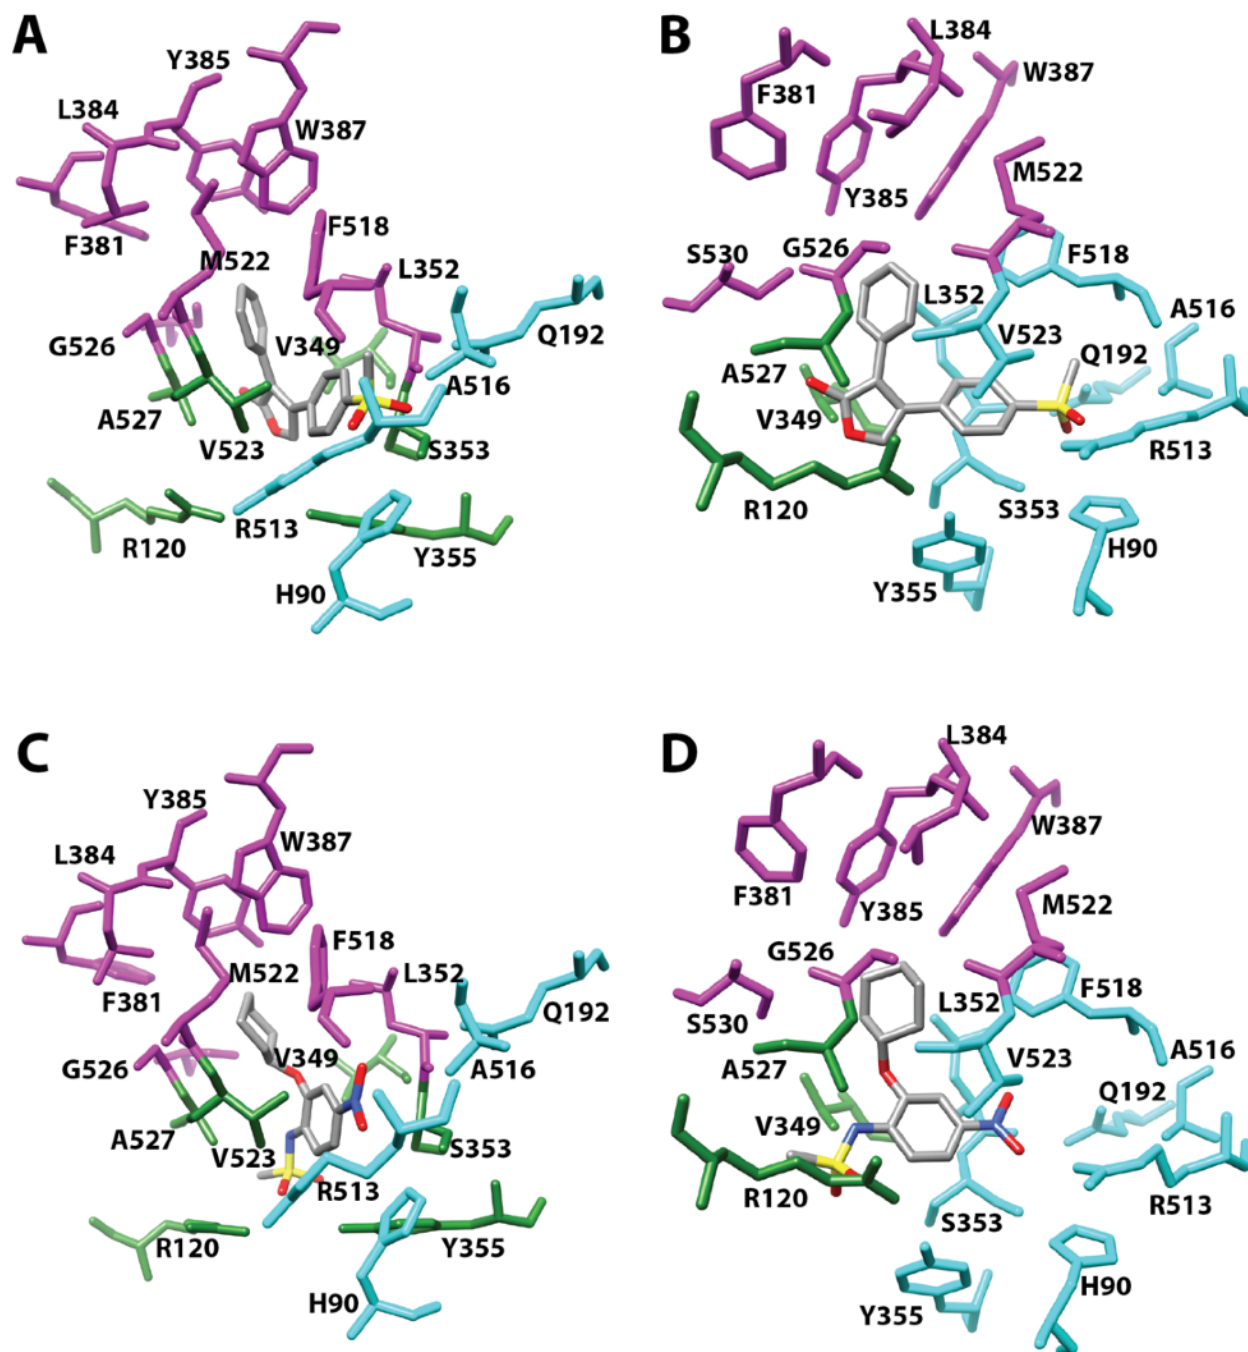

**Figure S16.** Structure of (A & B) rofecoxib and (C & D) NS-398 bound in the cyclooxygenase active site of COX-2 and the side chains that make up the proximal binding pocket (green), the central binding pocket (magenta), and the COX-2 side pocket (cyan). In (A) and (C), the residues are colored as in most previous figures. In (B) and (D), some residues in the proximal and central binding pockets that are shared with the COX-2 side pocket are colored cyan to highlight the interaction with the phenylmethylsulfone group of rofecoxib and the absence of an interaction with the side pocket in the case of NS-398. From PDB #5KIR and #3QMO.

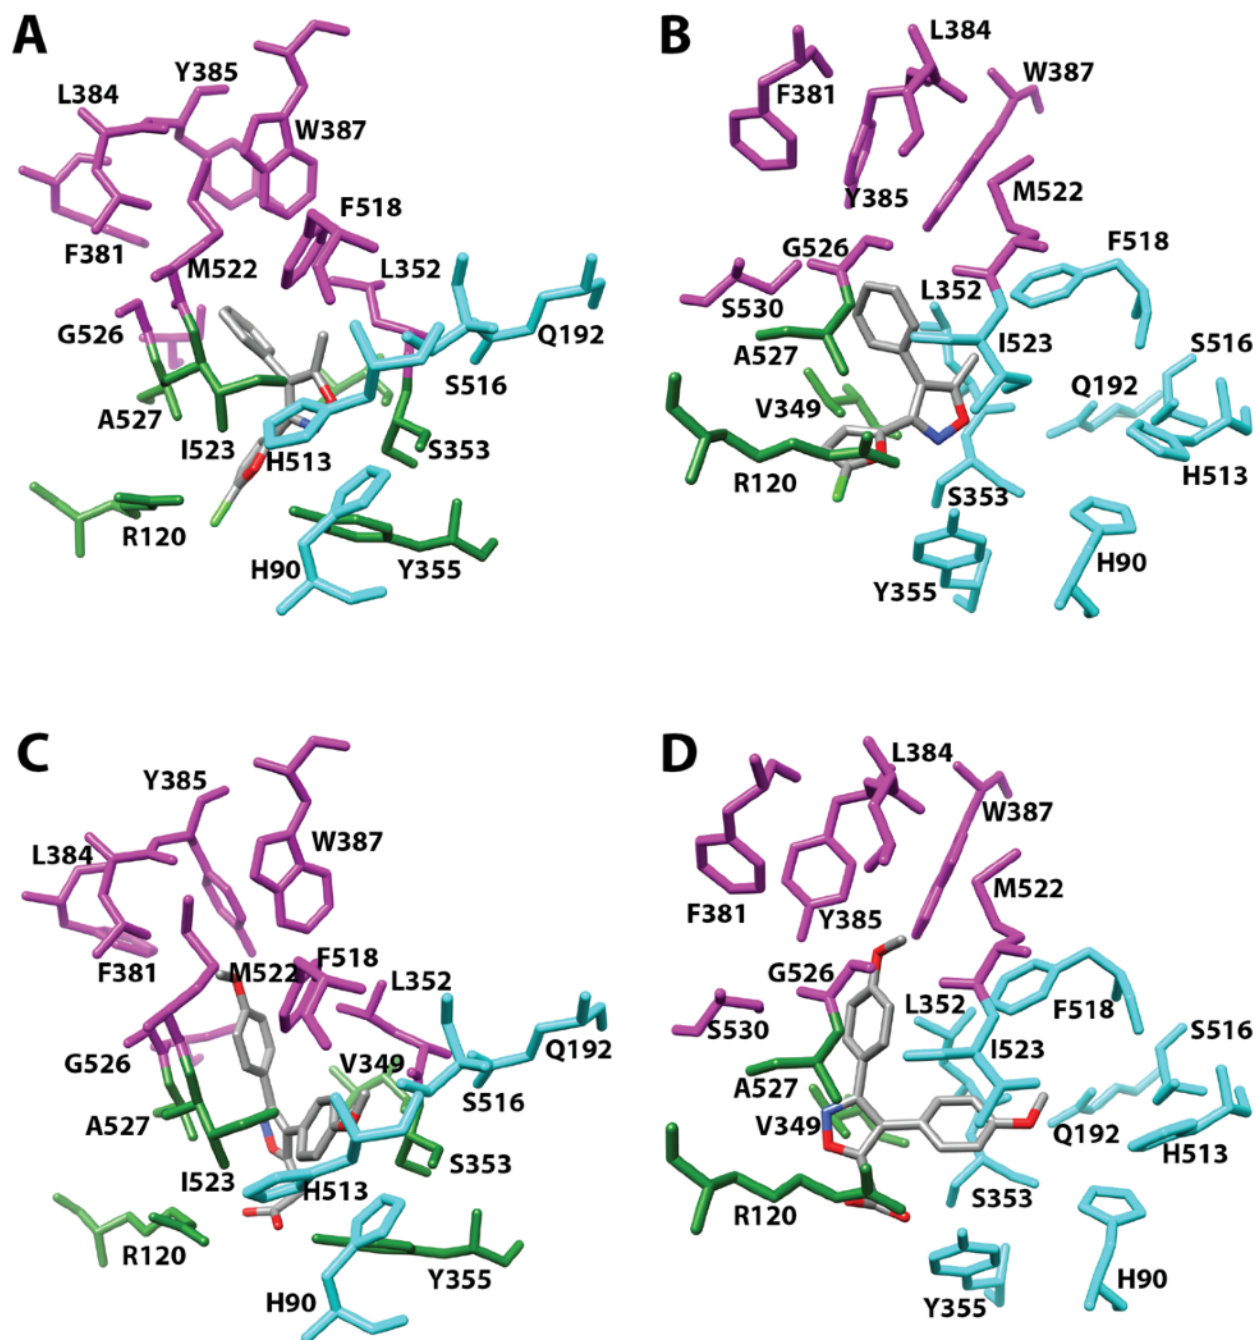

**Figure S17.** Structure of (A & B) P6 and (C & D) mofezolac bound in the cyclooxygenase active site of COX-1 and the side chains that make up the proximal binding pocket (green), the central binding pocket (magenta), and residues corresponding to the COX-2 side pocket (cyan). In (A) and (C), the residues are colored as in most previous figures. In (B) and (D), some residues in the proximal and central binding pockets that are shared with the COX-2 side pocket are colored cyan to highlight the interaction with the methoxybenzyl group of mofezolac and the absence of a significant interaction with the side pocket in the case of P6. From PDB #5U6X and #5WBE.



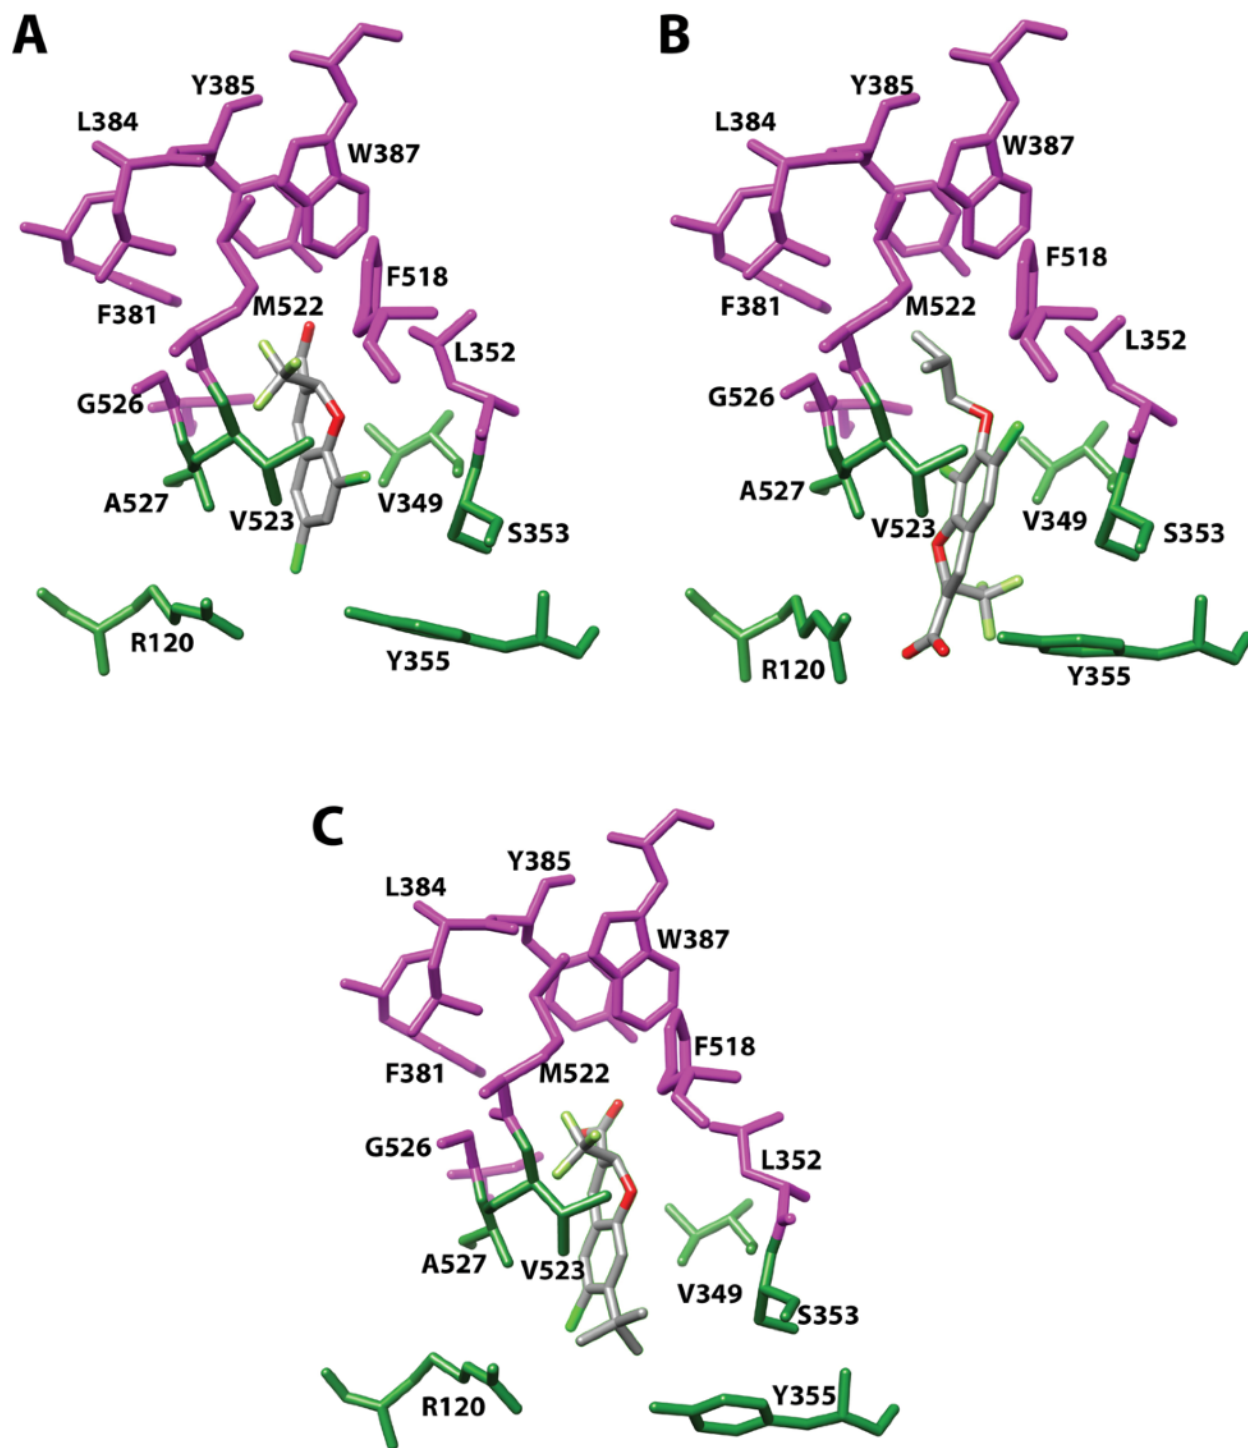

**Figure S18.** Structure of (A) (*S*)-5c, (B) (*R*)-23d, and (C) (*S*)-SC-75416 bound in the cyclooxygenase active site of COX-2 and the side chains that make up the proximal binding pocket (green) and the central binding pocket (magenta). From PDB #3LN0, #3NTG, and 3MQE.



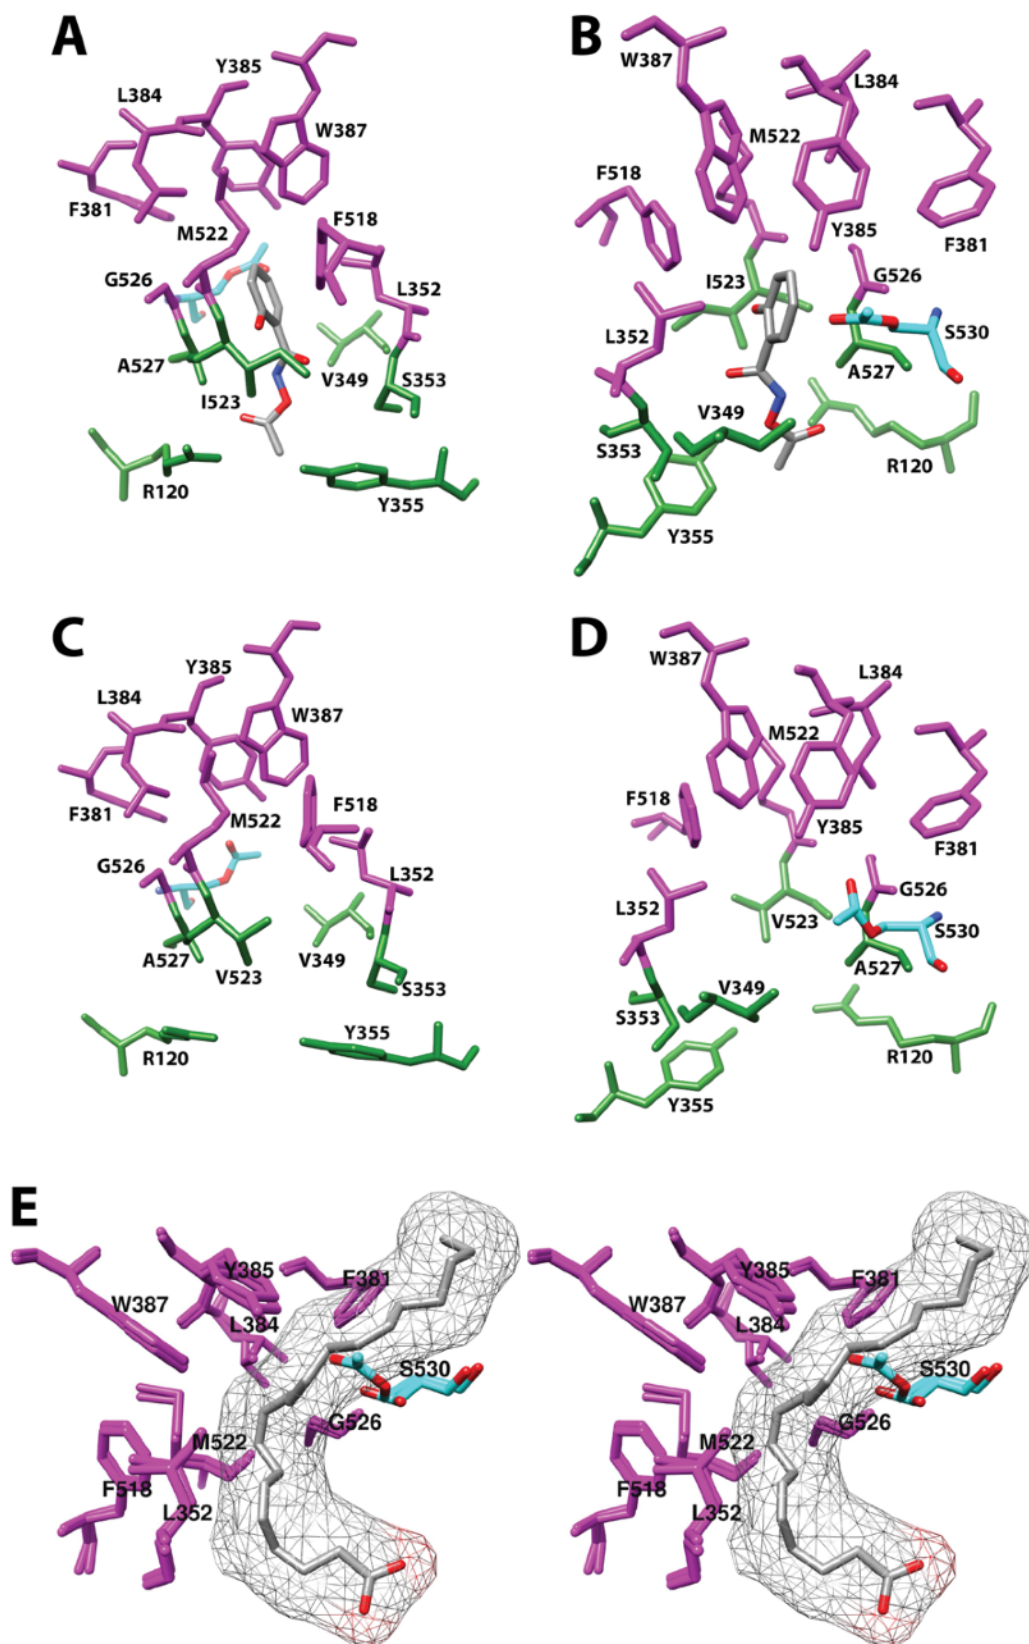

Figure S19. Structure of (A & B) acetylated COX-1 containing *O*-acetylsalicylhydroxamic acid bound in

the cyclooxygenase active site and (C & D) acetylated COX-2. (E) Cross-eyed stereo view of the structure of acetylated COX-2 superimposed over the structure of the productive conformation of AA complexed with COX-2. AA is colored by atom, with its surface shown in mesh. The steric clash between AA and the acetyl group on Ser-530 can be readily seen. The side chains that make up the proximal binding pocket (green, A-D) and the central binding pocket (magenta, A-E) are shown. The acetylated Ser-530 residue is colored by element on a cyan background. From PDB #1EBV and #5F19.

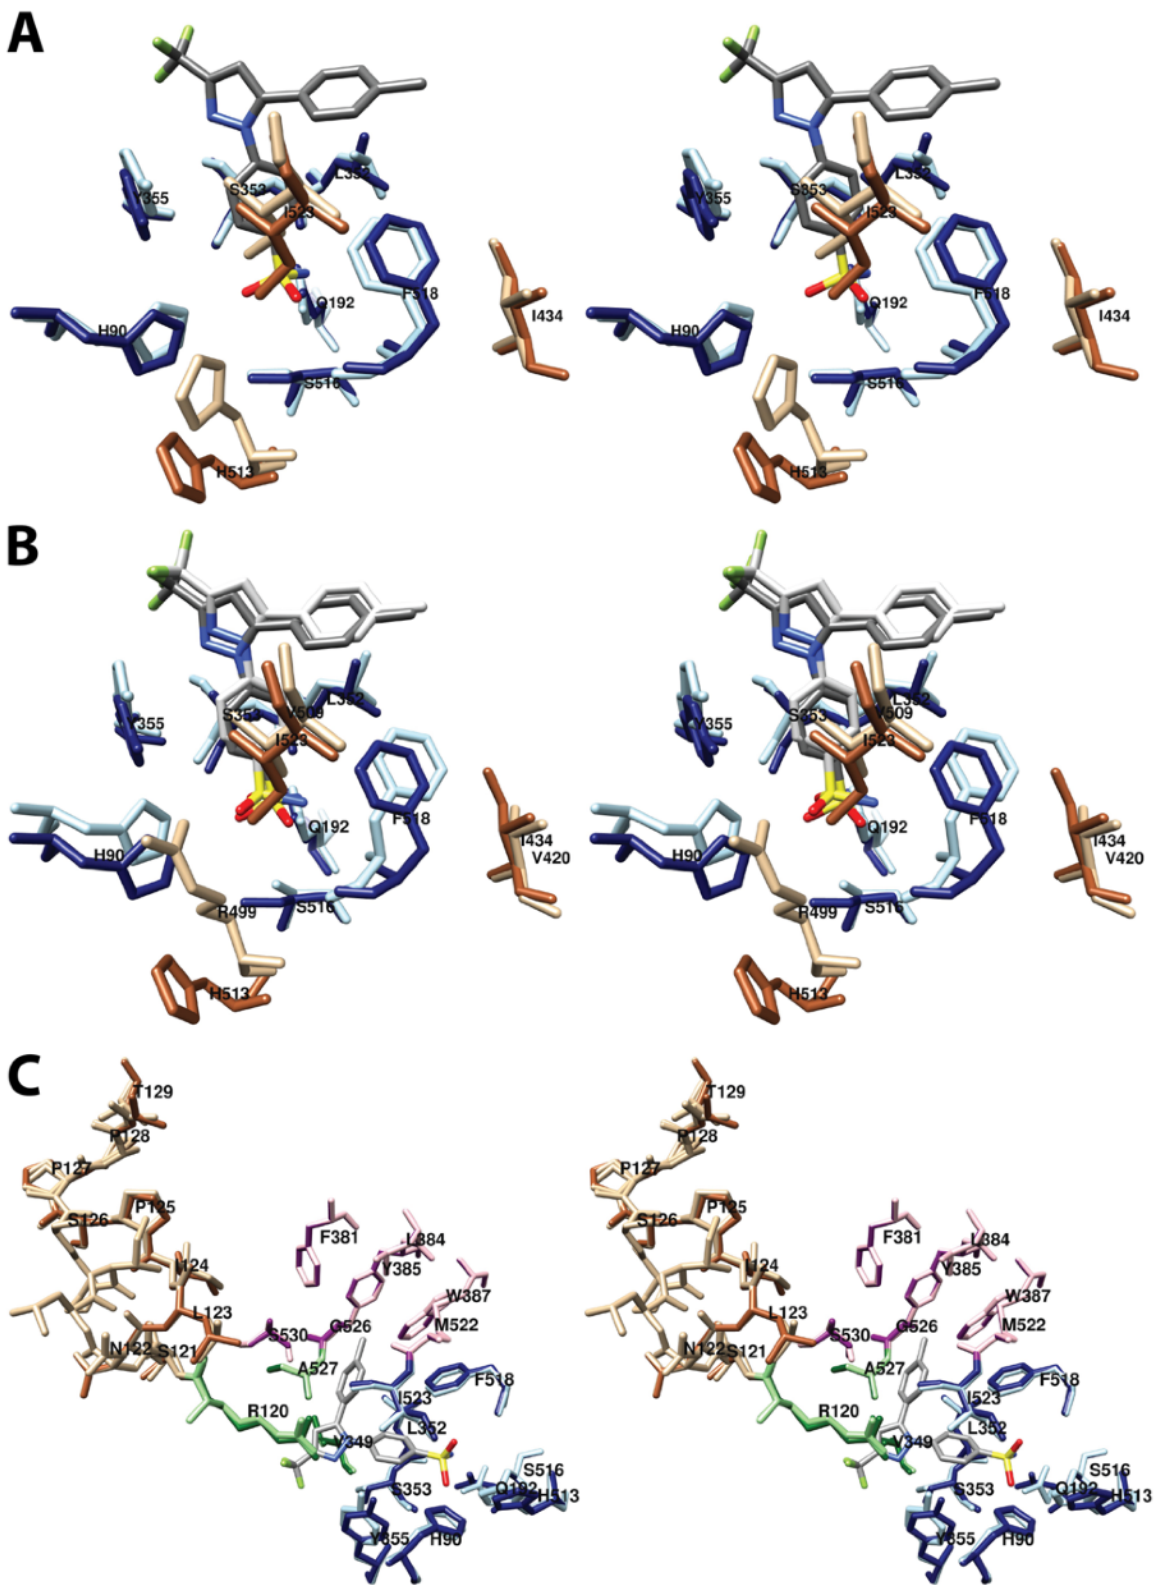

**Figure S20.** Cross-eyed stereo views of the structure of COX-1 complexed with celecoxib overlaid with (A) the structure of COX-1 complexed with (S)-flurbiprofen or (B) the structure of COX-2 complexed with

celecoxib. Key residues making up the side pocket are shown in dark blue (COX-1-celecoxib complex) or light blue (alternative complexes). The residues that differ between COX-1 and COX-2 (Ile/Val-434, His/Arg-513, Ile/Val-523) are shown in sienna (COX-1-celecoxib complex) or tan (alternative complexes). Celecoxib is colored by heteroatom on a dark gray (COX-1-celecoxib complex) or light gray (COX-2-celecoxib complex) background. (S)-Flurbiprofen is not shown. Note that the numbering in the COX-2-celecoxib complex, for residues Val-434, His-513, and Val-523 use the actual COX-2 residue numbers of 420, 499, and 509, respectively, reflecting the numbers in the PDB file. (C) Cross-eyed stereo view of COX-1 complexed with celecoxib The side chains that make up the proximal binding pocket (green) the central binding pocket (magenta), and the side pocket (blue) are shown. The structures of the two subunits are overlaid with subunit A (containing celecoxib) shown in the darker colors. Also shown are residues 121-129, which exist in two conformations in subunit B depending on the presence or absence of bound celecoxib. Subunits containing inhibitor exhibit the same conformation as is observed in subunit A (sienna), whereas those lacking inhibitor diverge between Ser-121 and Pro-125. From PDB #3KK6, #1EQH, and #3LN1.
